1 **Genomic surveillance reveals early detection and transition of Delta to Omicron**  
2 **Lineages of SARS-CoV-2 Variants in wastewater treatment plants of Pune, India**

3 Vinay Rajput <sup>a,b,1</sup>, Rinka Pramanik <sup>a,1</sup>, Vinita Malik <sup>a</sup>, Rakeshkumar Yadav <sup>a,b</sup>, Pradnya  
4 Kadam <sup>c</sup>, Unnati Bhalerao <sup>c</sup>, Manisha Tupekar <sup>c</sup>, Dipti Deshpande <sup>c</sup>, Priyanki Shah <sup>d</sup>, LS  
5 Shashidhara <sup>c,d</sup>, Radhika Boargaonkar <sup>e</sup>, Dhawal Patil <sup>e</sup>, Saurabh Kale <sup>e</sup>, Asim Bhalerao <sup>f</sup>,  
6 Nidhi Jain <sup>f</sup>, Sanjay Kamble <sup>g</sup>, Syed Dastager <sup>a,b</sup>, Krishanpal Karmodiya <sup>c</sup>, Mahesh  
7 Dharne <sup>a,b\*</sup>

8 <sup>a</sup> National Collection of Industrial Microorganisms (NCIM), Biochemical Sciences  
9 Division, CSIR-National Chemical Laboratory (NCL), Pune 411008, Maharashtra,  
10 India

11 <sup>b</sup> Academy of Scientific and Innovative Research (AcSIR), Ghaziabad 201002, Uttar  
12 Pradesh, India

13 <sup>c</sup> Department of Biology, Indian Institute of Science Education and Research (IISER),  
14 Pune 41108, Maharashtra, India

15 <sup>d</sup> The Pune Knowledge Cluster (PKC), Savitribai Phule Pune University (SPPU),  
16 Pune, Maharashtra, India

17 <sup>e</sup> Ecosan Services Foundation (ESF), Pune 411030, Maharashtra, India

18 <sup>f</sup> Fluid Robotics Private Limited (FRPL), Pune 411052, Maharashtra, India

19 <sup>g</sup> Chemical Engineering and Process Development Division, CSIR-National Chemical  
20 Laboratory, Pune 411008, Maharashtra, India

21

22 <sup>1</sup>These authors contributed equally

23

24

25 \* Corresponding Author Details: National Collection of Industrial Microorganisms  
26 (NCIM), Biochemical Sciences Division, CSIR-National Chemical Laboratory, Pune  
27 411008, India. E-mail address: ms.dharne@ncl.res.in (Mahesh S. Dharne).

28 **Highlights**

29 □ Omicron fragments were detected in the sewershed samples prior to clinical  
30 samples.

31 □ Omicron sub-lineages BA.2.12, BA.2.38, BA.2.75, BA.3, BA.4, and XBB were  
32 prevalent.

33 □ Lineage composition analysis indicated transition from Delta to Omicron variant  
34 indicated cause of third wave in India.

35 □ Overall, 426 lineages of 17 highly transmissible variants of SARS-CoV-2 were  
36 detected in the study.

37

## 38 **Abstract**

39 The COVID-19 pandemic has emphasized the urgency for rapid public health  
40 surveillance methods in early detection and monitoring of the transmission of  
41 infectious diseases. The wastewater-based epidemiology (WBE) has emerged as a  
42 promising tool to analyze and enumerate the prevalence of infectious pathogens in a  
43 population ahead of time. In the present study, real time quantitative polymerase chain  
44 reaction (RT-qPCR) and Illumina sequencing was performed to determine the SARS-  
45 CoV-2 load trend and dynamics of variants over a longitudinal scale in 442  
46 wastewater (WW) samples collected from 10 sewage treatment plants (STPs) of Pune  
47 city, India, during November 2021 to April-2022. In total 426 distinct lineages  
48 representing 17 highly transmissible variants of SARS-CoV-2 were identified. The  
49 SARS-CoV-2 Omicron variant fragments were detected in WW samples prior to its  
50 detection in clinical cases. Moreover, highly contagious sub-lineages of Omicron,  
51 such as BA.2.12 (0.8-0.25%), BA.2.38 (0.8-1.0%), BA.2.75 (0.01-0.02%), BA.3  
52 (0.09-6.3%), BA.4 (0.24-0.29%), and XBB (0.01-13.7%) fragments were significantly  
53 detected. The longitudinal analysis also suggested the presence of the BA.5 lineage in  
54 November 2021, which was not reported in the clinical settings throughout the  
55 duration of this study, indicative of silent variant persistence. Overall, the present  
56 study demonstrated the practicality of WBE in early detection of SARS CoV-2  
57 variants, which could be useful in tracking future outbreaks of SARS-CoV-2. Such  
58 approaches could be implicated in the monitoring of the infectious agents before they  
59 appear in clinical cases.

60 **Keywords:** SARS-CoV-2; wastewater-based epidemiology; Early warning; Next-  
61 generation sequencing; COVID-19; wastewater

## 62 **Abbreviations**

63 Wastewater, WW; COVID-19, coronavirus disease 19; SARS-CoV-2, severe acute  
64 respiratory syndrome coronavirus 2; WHO, The World Health Organization; VOI,  
65 variants of interest; VOC, variants of concern; WBE, wastewater-based epidemiology;  
66 E, envelope E; N, nucleocapsid; WWTP, wastewater treatment plants; PEG-8000,  
67 polyethylene glycol-8000; IISER, Indian Institute of Science Education and Research,  
68 NCL, National Chemical Laboratory

## 69 **1. Introduction**

70 The SARS-CoV-2 pandemic, initially detected in Wuhan, China in 2019,  
71 spreads rapidly all over the world (Global research on coronavirus disease (COVID-  
72 19),” W.H.O). As the virus spreads, the emergence of new variants has become a  
73 concern for public health officials. The clinical testings have limitations in detecting  
74 and tracking the spread of variants (Faria et al., 2021; Li et al., 2020). Also, the  
75 SARS-CoV-2 virus epidemic has sparked global efforts to understand its transmission  
76 dynamics and the emergence of new variations (Kucirka et al., 2020; Rambaut et al.,  
77 2020). To address this challenge, researchers have begun exploring alternative  
78 methods for monitoring the spread of SARS-CoV-2, such as wastewater-based  
79 epidemiology (WBE) (de Roda Husman et al., 2020; van der Meer et al., 2020).

80 WBE involves analyzing viral particles present in sewage to infer the spread  
81 of infection within a population. WBE has been used to study other viral diseases,  
82 such as influenza and hepatitis E (Heijnen and Medema, 2011; Rosa et al., 2014), and  
83 has recently been applied to SARS-CoV-2. Studies by Peccia et al., 2020b and Ahmed  
84 et al., 2022 have provided essential insights into the feasibility and applicability of  
85 WBE for SARS-CoV-2, highlighting its potential as an early detection system for  
86 population infection dynamics. Several studies have been conducted globally, with  
87 notable contributions from researchers in Germany, Italy, Netherlands, Finland, USA,  
88 Japan, France, Canada and India (Maida et al., 2022; Tiwari et al., 2022b; Prado et al.,  
89 2021; Stephens et al., 2022; Ho et al., 2022; Amman et al., 2022; Kumar et al., 2020).  
90 These studies provides essential information on the detection, quantification and  
91 genetic characterization of SARS-CoV-2 in sewage samples (Srivastava et al., 2021;  
92 Dharmadhikari et al., 2022; Lamba et al., 2023). The WBE has the potential to detect  
93 viral signals earlier than clinical surveillance methods and can offer a less biased  
94 assessment of viral heterogeneity and public health (Joshi et al., 2022; Jahn et al.,  
95 2022; Morvan et al., 2022). The ongoing COVID-19 outbreak has brought attention to  
96 the need for rapid and accurate surveillance of the spread of SARS-CoV-2.

97 The impact of SARS-CoV-2 has been felt globally since its emergence in 2019  
98 (Chakraborty and Maity, 2020). The virus, which causes COVID-19, has resulted in  
99 substantial interruptions to everyday life and economic activities, as well as  
100 widespread disease and death. (Shang et al., 2021, Li et al., 2020). One of the critical

101 concerns in the COVID-19 epidemic is the advent of novel SARS-CoV-2 variants,  
102 which may be more transmissible and lead to more severe disease (Aleem et al., 2022).  
103 Omicron variant is known to be associated with a high number of cases across the  
104 globe (Nyberg et al., 2022). The virus has significantly impacted India, with several  
105 clinical cases and deaths reported (Ranjan, 2022). Among the Indian cities affected,  
106 Pune has recorded one of the highest numbers of SARS-CoV-2 Omicron cases. To  
107 comprehend the propagation and evolution of SARS-CoV-2, researchers have used  
108 next-generation sequencing (NGS) platforms to analyze genomic sequences of the  
109 virus. These studies have shown that different SARS-CoV-2 variants have emerged in  
110 vast geographical areas, with varying infectivity and transmission capability levels. In  
111 light of this, NGS platforms have proven to be a valuable tool in understanding the  
112 evolution of the virus and the dangers it poses to society. Studies by Agrawal et al.,  
113 2022 in Germany, Landgraff et al., 2021 in Canada, Wilton, 2021 in London, Crits-  
114 Christoph, 2021 in California, and Dharmadhikari et al., 2022 in India have used NGS  
115 platforms to identify SARS-CoV-2 mutations in wastewater. These studies have  
116 proven that WBE can capture SARS-CoV-2 and its mutants in wastewater, providing  
117 insight into the spread of the virus in communities.

118 The present study is the first in-depth longitudinal study employing  
119 wastewater-based SARS-CoV-2 sequencing to delineate the overall dynamics of  
120 SARS-CoV-2 lineages in Pune city, India. Here, we utilized WBE to monitor the  
121 emergence of SARS-CoV-2 variants, specifically the Omicron lineage in Pune City,  
122 analyzing its presence in wastewater samples and assessing its impact on the local  
123 population and healthcare system. Understanding the dynamics of the Omicron  
124 variant and its sub-lineages will provide insights that can inform public health  
125 response and help mitigate the spread of the virus. To achieve our objectives, we  
126 systematically analyzed wastewater samples collected from different locations in  
127 Pune City, using RT-qPCR and sequencing techniques to detect and quantify the  
128 presence of the Omicron variant. This study will provide critical insights into the  
129 dynamics of the Omicron variant in Pune City and inform the development of  
130 effective public health measures to combat its spread.

## 131 **2. Materials and Methods**

### 132 **2.1. Wastewater sample collection and SARS-CoV-2 sequencing**

133 Sewage wastewater samples were taken from the inlets of 10 sewage treatment  
134 plants (STPs) in Pune (Fig.1, Table.S1). The sample collection included a grab-  
135 sampling method, executed following the CDC, USA guidelines of COVID-19  
136 wastewater sampling, and approved by the Institutional Biosafety Committee (IBSC).  
137 Sampling was carried out two times in a week from 10 STPs, in the period of  
138 November 2021 - April 2022 in 1L sterile polypropylene bottles and stored at 4°C  
139 until processing. The processing was carried out immediately as per CDC, USA  
140 guidelines of COVID-19 sewage water sampling. The sampling bottle was wiped  
141 with 70% ethanol and subjected to heat inactivation at 60°C. 80 ml of the sample was  
142 aliquoted in a 250 ml HDPE bottle (HiMedia, India) and subjected to viral RNA  
143 concentration using the polyethylene glycol (PEG) precipitation method. The detailed  
144 protocol of sample processing and RT-qPCR is given in supplementary information  
145 (Supplementary File.2) Sequencing was carried out at Next Generation Genomics  
146 facility at IISER, Pune, India. The library preparation was carried out using Illumina  
147 Covid seq RUO kits (Illumina, USA). Sequencing was carried out using Illumina  
148 NextSeq 550 sequencer.

## 149 **2.2. Bioinformatics Analysis**

150 In this study, an in-house bioinformatics pipeline was designed to identify the  
151 predominant lineages and their signature mutations of SARS-CoV-2 in the sample.  
152 The pipeline consisted of several crucial steps to ensure the accuracy of the results.  
153 The first step involved quality control and filtering of the raw reads using fastp (Chen  
154 et al., 2018), which helps to ensure the quality of the data being analyzed. The filtered  
155 reads were then aligned with the reference genome of SARS-CoV-2 (MN908947.3)  
156 using BWA-Mem (Li and Durbin, 2010), providing basic alignment and coverage  
157 statistics using SAMtools coverage/bedcov (Li et al., 2009). To determine single  
158 nucleotide variants (SNVs), iVar (Grubaugh et al., 2019) tool was used with  
159 parameters of a minimum base quality score of 20, minimum frequency of 0.03, and  
160 minimum read depth of 10. To predict the lineage composition of the SARS-CoV-2  
161 variants in a sample, we utilized LCS (Valieris et al., 2022b), a mixture model  
162 designed to determine the variant composition in environmental samples. We used  
163 LCS lineage abundance estimates to compute Shannon diversity and Bray-Curtis  
164 dissimilarity metrics, as well as an Adonis statistical analysis using R-programming

165 packages such as vegan v2.5-7, ggplot, and phyloseq. Finally, data analysis was  
166 performed using scripting in R/Python/Bash to manually check variant-associated  
167 mutations and to plot the results.

### 168 **3. Results**

#### 169 **3.1. Quantification and correlation of SARS-CoV2**

170 We analyzed data collected from 10 sewage treatment plants (STPs) located  
171 across the Pune city, covering an estimated 92% of the city's population between  
172 November 2021 and April 2022 (Fig.1, Table.S1). An average of two samples were  
173 taken from each location per week to assess the level of community spread.  
174 Wastewater samples were processed and analyzed within 24h of sample collection.  
175 RT-qPCR was employed to test 442 samples for the presence of SARS-CoV-2 genetic  
176 material using three different genetic target regions: N, RdRp, and E gene. A sample  
177 was considered positive for SARS-CoV-2 when any two genes showed Ct values  
178 lower than 35. In total, 142 out of 442 samples were positive, while the remaining 300  
179 were negative, representing a total positive detection rate of 32.12%. (Table.S2)

180 To gain insights to the prevalence of SARS-CoV-2 infection in the community,  
181 we calculated the amount of virus present in each sample using a viral load  
182 calculation tool. The results of this analysis, depicting the levels of SARS-CoV-2 in  
183 wastewater and clinically reported cases in Pune  
184 (<http://cms.unipune.ac.in/~bspujari/Covid19/Pune2/>) are illustrated in (Fig.2, Fig.3).  
185 A strong correlation for the entire city viral load exhibits a significant association with  
186 daily clinically reported COVID-19 positive cases ( $R^2=0.81$ ,  $p<22e-16$ ; Fig.S1.A) and  
187 7-day moving average COVID-19 cases ( $R^2=0.83$ ,  $p<22e-16$ ; Fig.S1.B). The RT-  
188 qPCR analysis revealed an increase in viral load during the SARS-CoV-2 surge in  
189 January 2022, with the virus detected in the samples throughout the period from  
190 November 2021 to April 2022. The viral load was observed lowered in November and  
191 December 2021, with an average viral copy of 3.2 gc/ml and 2.2 gc/ml, respectively,  
192 while a sharp increase in viral load was noted in January 2023, with an average  
193 detection of 83.9 gc/ml. Overall wastewater viral trend forms an early mirror image  
194 over clinically reported COVID-19 cases, demonstrating the usefulness of WBE in  
195 detecting the early transmission of SARS-CoV-2 infection in the community.

196 The SARS-CoV-2 signals were detected across all STPs throughout the study.  
197 When COVID-19 entered Pune in its third wave, all STPs began to give early  
198 warnings 08 to 17 days before the city's clinical COVID-19 cases substantially  
199 increased. STP sites such as Old Naidu, Mundhwa, and New Naidu and Kharadi gave  
200 early warning signals from December 8<sup>th</sup> to December 16<sup>th</sup>, 2021, sequentially,  
201 whereas STP sites like Tanajiwadi, BhairobaNala, Bopodi, and Erandwane began  
202 providing early warning signals after December 20<sup>th</sup>, 2021. However, STP sites of  
203 Vitthalwadi and Baner gave signals at the same time the clinical cases substantially  
204 started increasing (Fig.2, Fig.3), which probably indicates the effective clinical testing  
205 in the region. This phenomenon of detecting 08 to 17 days early viral signals from  
206 wastewater proves the usefulness of WBE as a system for early detection.

### 207 **3.2. Prediction and diversity of SARS-CoV-2 variants in wastewater**

208 To understand the dynamics of SARS-CoV-2 variants in the city, we  
209 conducted a large-scale SARS-CoV-2 sequencing effort on 442 samples collected  
210 over six months from November 2021 to April 2022 (Table.S3). A significant  
211 proportion of the samples which is 52%, failed to yield sufficient sequencing data due  
212 to low viral load as evidenced by high cycle threshold (Ct) values. However, the  
213 remaining 48% of samples met our stringent quality criteria, including detection  
214 confidence of SARS-CoV-2 and minimum genome coverage of 55%, and were  
215 subsequently used for lineage prediction analysis. The study's findings offer insightful  
216 information on the evolution and propagation of SARS-CoV-2 variants within our  
217 study population.

218 The relative frequencies and diversity of SARS-CoV-2 lineages in wastewater  
219 were analyzed using the *LCS* tool in a study conducted from November 2021 to April  
220 2022. A total of 426 distinct lineages representing 17 highly transmissible variants of  
221 SARS-CoV-2 were identified in WW during this period (Fig.2, Fig.3). The Delta  
222 lineage was found to be the most dominant during November and December 2021,  
223 with an overall percentage of 80% and 55% respectively (Table.S5), followed by the  
224 Kappa lineage, which accounted for 12% and 30% of the total lineages during the  
225 same period, while BA.3 and BA.2 lineages accounts for 2.4-6.3% and 0-3%  
226 respectively. The BA.1 lineage accounted for only 0.3% and 0.2% in January and  
227 February'2022, respectively. The remaining 8% of lineages were classified as "others".



228 However, small signals of the Omicron lineage started to be detected during  
229 November 2021 (2.6%) and December 2021 (7.9%), with a 10-fold increase in  
230 January 2022 (70%) to become the most prevalent lineage from January 2022  
231 onwards (Fig.4). Interestingly, the study also detected strong signals of the XBB  
232 lineage in March samples accounts for 13.7% to total lineages. This emphasizes the  
233 significance of continuing monitoring of SARS-CoV-2 variants in WW to better  
234 understand their spread and transmission dynamics. Identifying highly transmissible  
235 variants in WW may also affect public health interventions and measures.

### 236 **3.3. Diversity and correlation between Wastewater and Clinical SARS-CoV-2** 237 **data**

238 We aimed to correlate the lineage composition between clinical and  
239 wastewater samples of SARS-CoV-2 in Pune city, India. We retrieved 3223 SARS-  
240 CoV-2 genomes from GISAID from November 2021 to April 2022, submitted from  
241 Pune city (Table.S6). A total of 98 distinct lineages and sub lineages were identified  
242 during this period. Based on the predominance of each lineage in India, the lineages  
243 were categorized according to the INSACOG categorization for further study  
244 (INSACOG Dashboard, Table.S7). The results showed that the overall clinical  
245 lineages followed a similar pattern as the wastewater samples. The Omicron lineage  
246 and its sub lineages were the dominant lineages from January to April 2022. Omicron  
247 BA.2 accounted for 51.6% of all lineages, followed by Omicron BA.2.10 (14.8%),  
248 Omicron BA.2.X (13.8%), Omicron BA.1.X (6.3%), Omicron BA.1 (5.6%), and  
249 Omicron BA.2.38 (4.9%). (Fig.S3). However, the Delta lineage was the most  
250 dominant lineage during November and December 2021. Specifically, the  
251 Delta\_B.1.617.2 lineage accounted for 88.1% of the total lineages, followed by early  
252 signals of Omicron\_BA.1.X (5.2%), Omicron\_BA.2 (2.8%), and Omicron\_BA.1  
253 (2.1%). Similarly, the wastewater samples had dominant lineages of Delta\_B.1.617.2  
254 and Kappa during November and December 2021. Later, the Omicron variant  
255 takeover the Delta variant and became a dominant variant by January' 2022 (Fig.4).  
256 This transition from Delta to the omicron variant highlights the significance of  
257 ongoing monitoring and observation of SARS-CoV-2 lineages in both clinical and  
258 wastewater samples to gain a better understanding of their spread and transmission  
259 dynamics.

260 To understand the diversity of SARS-CoV-2 lineages circulating in the  
261 community, we calculated Simpson indices for all the samples collected from various  
262 sites. These indices measure the total diversity of a community and are commonly  
263 used in ecology and epidemiology. The results of our analysis revealed a significant  
264 difference in diversity between months (Kruskal-Wallis,  $p=2.6e-12$ ) but no significant  
265 difference by location (Fig.S2.A, Fig.S2.B). To further investigate the variation in  
266 diversity across time, we used the Bray-Curtis dissimilarity matrix with the Adonis  
267 test to compute beta diversity. This approach allows for comparing community  
268 composition between different samples or groups. The analysis found a significant  
269 difference in beta diversity across the months ( $R^2 = 0.55$ ,  $P>0.001$ ) but no significant  
270 variation by location (Fig.S2.C, Fig.S2.D). These results suggest that temporal rather  
271 than geographic factors primarily influence the diversity of SARS-CoV-2 lineages in  
272 Pune. Overall, these findings discern the dynamics of SARS-CoV-2 lineage diversity  
273 in the population and highlight the importance of continued monitoring to track  
274 emerging variants of concern.

### 275 **3.4. Early detection of Omicron and its sub-lineages**

276 To determine the population's exposure to SARS-CoV-2 variants, we utilized  
277 the *iVar* tool to analyze each sample for co-occurring signature mutations of the  
278 Omicron variant (BA.1, BA.2, BA.3, BA.4, BA.5, BA.1.x, BA.2.x, BA.3.x, BA.4.x,  
279 BA.5.x). Despite some limitations in the sequencing data due to low RNA  
280 concentrations in certain samples, we could still detect characteristic signals of the  
281 Omicron variant. Our analysis revealed that wastewater samples taken from the STP  
282 at Bhairobanala was the first one to have the Omicron signals : S: D614G, S: H655Y,  
283 S: N679K, S: P681H, N: P13L) and Tanajiwadi (S: N440K, S: S477N, S: T478K, S:  
284 E484A, S: Q493R, S: Q498R, S: N501Y, S: Y505H, S: T547K, S: D614G, E: T9I, on  
285 November 1st, 2021, before it was classified as a VOC by the World Health  
286 Organization (“Tracking SARS-CoV-2 variants,” WHO) on November 26th, 2021  
287 (Table.S8). The Omicron was also detected in samples collected from the STP at  
288 Bopodi ((S: L452R, S: T478K, E: T9I) on November 2nd, 2021, before it was  
289 confirmed in Pune's first clinical case on December 5th, 2021. Furthermore, our  
290 analysis revealed that Omicron and its sub lineages were detected in wastewater  
291 samples collected from nine out of ten STPs in Pune, indicating widespread

292 community exposure to this variant before its detection in clinical cases (Table.S9).  
293 These findings emphasize the use of wastewater-based surveillance in tracking the  
294 emergence and spread of SARS-CoV-2 variants in the community. It is important to  
295 note that our investigation was carried out in India, and the Omicron variant was  
296 discovered in Botswana on November 2011. As such, our data suggest that Omicron  
297 may have been circulating in wastewater prior to its detection in clinical cases. The  
298 findings of this investigation offer crucial insights into the early detection and spread  
299 of SARS-CoV-2 in the community and support the implementation of WBE as a  
300 complementary approach to traditional clinical surveillance.

301 Moreover, to evaluate the rise of variation in the lineage of SARS-CoV-2 in  
302 the population, we employed a linear mixed model analysis to examine the correlation  
303 between the initial detection of variant of concern in wastewater and the date when  
304 clinical samples were collected from Pune city and submitted to GISAID. Our  
305 examination revealed a trend of increasing presence of the Omicron variant  
306 (B.1.1.529) and its sub lineages (BA.1, BA.2, BA.2.12, BA.2.X, BA.2.38, BA.3,  
307 BA.4, BA.5) starting from January 2022. As time progressed, however, we noted a  
308 reduction in the frequency of the Kappa (B.1.617.1) and Delta (B.1.617.2) lineages,  
309 with the Omicron variant completely dominating by February 2022 (Fig.5).  
310 Additionally, we observed an upward trend in the prevalence of the XBB lineage  
311 starting from January 2022. These findings emphasize the crucial importance of  
312 ongoing monitoring of the variations in SARS-CoV-2 in order to inform public health  
313 strategies.

#### 314 4. Discussion

315 The emergence of new SARS-CoV-2 variants has been a key cause of concern  
316 in the ongoing COVID-19 epidemic. One such variant, Omicron, has been identified  
317 in India (Gao et al., 2021). This variant has raised concerns due to its high  
318 transmissibility and potential to evade immunity from previous infections or vaccines  
319 (Shrestha et al., 2021; Zhang, 2022; Yadav and Kumar, 2022). Our study utilizes  
320 WBE to identify, track, and assess the SARS-CoV-2 genetic variants in Pune city,  
321 India. We collected 442 wastewater samples from 10 locations, representing an  
322 estimated 7.4 million individuals. WBE has been used in several studies globally to  
323 identify and quantify the SARS-CoV-2 fragments in wastewater (Srivastava et al.,

324 2021; Dharmadhikari et al., 2022; Joshi et al., 2022; Jahn et al., 2022; Morvan et al.,  
325 2022). By applying this model at the city level, we aim to prevent the spread of  
326 COVID-19 and better understand the dynamics of SARS-CoV-2 transmission in Pune  
327 city.

328 In this study, we used RT-qPCR and Illumina sequencing to quantify and  
329 monitor the genetic characteristics of SARS-CoV-2 variants. Our findings show a  
330 strong correlation between the viral load and clinical cases of COVID-19.  
331 Additionally, our data suggest that a significant amount of viral shedding likely  
332 occurs early in infection, particularly from asymptomatic individuals, before they seek  
333 medical attention and are tested for Covid-19 (Lamba et al., 2023). The SARS-CoV-2  
334 persists in faeces samples longer than in respiratory and serum samples (Prakash et al.,  
335 2021). In the present study, the SARS-CoV-2 was detected before an increase in  
336 clinical cases highlighting the potential utility of WBE as a tool for early detection  
337 and prevention of SARS-CoV-2 transmission. By monitoring STPs, public health  
338 officials can identify outbreaks and implement strict management strategies at the  
339 earliest stages of severe disease.

340 The SARS-CoV-2 genetic material was quantified using RT-qPCR, followed  
341 by Illumina sequencing to determine the trends of SARS-CoV-2 lineages  
342 disseminated in the community. Detecting SARS-CoV-2 titers in wastewater is  
343 challenging amid the fragmentation and PCR inhibitors, making it difficult to quantify  
344 and sequence for estimating lineage/variant composition (Baaijens et al., 2021).  
345 However, in this study, LCS (Lineage decomposition for SARS-CoV-2), a model for  
346 predicting the lineage composition in a sample, was utilized, which captures and  
347 classifies variant-specific mutations (Valieris et al., 2022). Our results showed that  
348 relative to the clinical testing, SARS-CoV-2 RNA content in wastewater provides a  
349 more accurate indicator for local infection dynamics (Karthikeyan, 2021); Randazzo  
350 et al., 2020; Polo et al., 2020). We found a wide range of SARS-CoV-2 lineages in  
351 wastewater, with some lineages that infect a substantial proportion of people  
352 exhibiting similar patterns. Additionally, we discovered low prevalent mixed lineages  
353 in wastewater that were undetectable from clinical data, suggesting that such lineages  
354 infected only a small number of individuals.

355 Furthermore, weak signals from novel variants imply the arrival of a new  
356 lineage into the population that could not be emphasized in clinical data- indicating  
357 the limited testing or testing for symptomatic individuals exclusively. We discovered

358 early XBB signals and other Omicron sub-lineages that were not previously reported  
359 in clinical data. This discrepancy highlights the lack of required sequencing, i.e. at  
360 least 0.5% of the positive cases (Grimaldi et al., 2022), which impacts the ability to  
361 detect SARS-CoV-2 variants quickly and undermines the global pandemic  
362 preparedness. Our research emphasizes the effects of socioeconomic disparities,  
363 population density, and wastewater treatment as powerful strategies to stop the spread  
364 of SARS-CoV-2 (Sharifi and Khavarian-Garmsir, 2020). It is imperative to continue  
365 monitoring and testing wastewater for SARS-CoV-2 to prevent the spread of new  
366 variants and to ensure global pandemic preparedness. We aimed to quantify the  
367 SARS-CoV-2 genetic material in wastewater samples and determine the genomic  
368 trends of SARS-CoV-2 lineages circulating in the community. Our results showed  
369 that wastewater samples exhibit greater alpha diversity than clinical samples.  
370 Additionally, the viral composition of the city did not show regional variability, as the  
371 beta diversity of SARS-CoV-2 did not differ by STP locations. However, there was a  
372 significant variation (35%) across clinical and wastewater samples, and distinct and  
373 common clusters of SARS-CoV-2 lineages were formed over time, suggesting  
374 introduction and elimination of various lineages in the community over time  
375 (Karthikeyan et al., 2022; Gu et al., 2022). These findings emphasize the significance  
376 of wastewater surveillance as a complementary tool to clinical testing in  
377 understanding the dynamics of SARS-CoV-2 transmission in the community.

378 We investigated the presence of different lineages and sub-lineages of SARS-  
379 CoV-2 in wastewater samples collected from Pune, India. Our findings showed the  
380 presence of several variants of the Omicron lineage, which have been linked to  
381 increased transmissibility, adverse health impacts, and hospitalization (Khandia et al.,  
382 2022; Araf et al., 2022.). Importantly, our results indicated that three out of the ten  
383 catchment areas had detectable levels of Omicron in the wastewater samples before  
384 the first clinical case of Omicron-positive in Botswana on November 11th, 2021: 10  
385 days earlier in Bhairobanala, 9 days earlier in Bopodi, and 10 days earlier in  
386 Tanajiwadi. Additionally, nine out of the ten catchment areas had Omicron signals in  
387 the wastewater samples before the first reported clinical case of Omicron in Pune city  
388 on December 5th, 2021: 19 days earlier in Baner, 34 days earlier in Bhairobanala, 33  
389 days earlier in Bopodi, 23 days earlier in Erandwane, 24 days earlier in Kharadi, 18  
390 days earlier in New Naidu, 25 days earlier in old Naidu, 34 days earlier in Tanajiwadi,  
391 and 24 days earlier in Mundhwa. This implies that a substantial portion of the

392 population was infected and shedding the virus before being diagnosed through  
393 clinical testing (He et al., 2020).

394 Furthermore, we discovered six highly transmissible lineages of Omicron in  
395 the wastewater samples before their detection in clinical samples from the city:  
396 BA.2.12, BA.2.38, BA.2.75, BA.3, BA.4, and XBB detected 20, 8, 153, 242, 127, and  
397 279 days earlier, respectively. Additionally, we found weak indications of lineage  
398 BA.5 in November 2022, which has yet to be reported in any clinical cases from Pune  
399 city. Our findings demonstrate the utility of WBE for detecting and monitoring the  
400 presence of SARS-CoV-2 variants in the community. Testing of wastewater captures  
401 the combined contributions of every individual in a catchment region, providing a less  
402 biased representation of viral diversity and public health (Karthikeyan et al., 2022). In  
403 contrast, delays in detection from clinical samples may be due to limited testing and  
404 sequencing or asymptomatic or home-testing cases (Mercer and Salit, 2021).  
405 Additionally, our study showed that sequencing data from wastewater samples could  
406 be used to monitor the prevalence of variants and estimate their growth rate, using  
407 significantly fewer samples than required for clinical samples. Overall, these results  
408 substantiates the importance of WBE as a complementary approach to traditional  
409 clinical surveillance for detecting and monitoring the spread of SARS-CoV-2 variants.  
410 Furthermore, it also highlights the potential of WBE to detect the emergence of new  
411 variants before they are identified in clinical samples.

## 412 5. Conclusion

413 The present study highlighted the efficacy of wastewater-based epidemiology (WBE)  
414 as a formidable tool in the early warning, detection, and monitoring of SARS-CoV-2  
415 variants. By conducting a comprehensive analysis of wastewater samples collected  
416 between November 2021 and April 2022, we could detect the Omicron variant  
417 fragments before clinical cases, providing valuable insights for public health officials  
418 to implement preventative measures. Our findings highlight the potential of WBE as a  
419 practical approach for real-time surveillance of infectious outbreaks, not only for  
420 SARS-CoV-2 but also for other pathogens. Integrating WBE into existing public  
421 health surveillance methods can significantly enhance our ability to understand the  
422 transmission dynamics and evolution of infectious diseases and, ultimately, help in  
423 preventing future outbreaks.

424 **Data availability:** All data produced in the present study are available upon  
425 reasonable request to the authors. Clinical COVID-19 data was used from CMS  
426 dashboard (<http://cms.unipune.ac.in/~bspujari/Covid19/Pune2/>)

427 **Declaration of competing interest:** The authors declare that they have no known  
428 competing financial interests or personal relationships that could have appeared to  
429 influence the work reported in this paper.

### 430 **Funding**

431 This work was financially supported by Rockefeller Foundation, USA (project code  
432 GAP 332926).

### 433 **Acknowledgments**

434 Authors wish to thank Directors of CSIR-NCL, IISER-Pune, and PKC for  
435 encouragement and support. We gratefully acknowledge Pune Municipal Corporation  
436 (PMC) for permission to carry out the sampling and use clinical COVID-19 data.  
437 Authors are indebted to Prof. Aurnab Ghose, IISER-Pune (for grant administration  
438 support and discussions), Dr. Dayanand Panse-ESF (for support and pre-preparations  
439 in sampling logistics) and Ms. Rachel Samson (for processing and RNA extractions of  
440 the subset samples). Authors also acknowledge <https://biorender.com/> for creation of  
441 images. The manuscript has been thoroughly checked for plagiarism content using  
442 iThenticate software.

### 443 **Reference**

444 Agrawal, S., Orschler, L., Schubert, S., Zachmann, K., Heijnen, L., Tavazzi,  
445 S., Gawlik, B.M., de Graaf, M., Medema, G., Lackner, S., 2022. Prevalence and  
446 circulation patterns of SARS-CoV-2 variants in European sewage mirror clinical data  
447 of 54 European cities. *Water Research* 214, 118162.  
448 <https://doi.org/10.1016/j.watres.2022.118162>

449 Ahmed, W., Bivins, A., Metcalfe, S., Smith, W.J.M., Ziels, R., Korajkic, A.,  
450 McMinn, B., Graber, T.E., Simpson, S.L., 2022. RT-qPCR and ATOplex sequencing  
451 for the sensitive detection of SARS-CoV-2 RNA for wastewater surveillance. *Water  
452 research* 220, 118621. <https://doi.org/10.1016/j.watres.2022.118621>

453 Aleem, A., Samad, A.B.A., Slenker, A.K., 2022. Emerging Variants of  
454 SARS-CoV-2 And Novel Therapeutics Against Coronavirus (COVID-19) - PubMed.

455 Amman, Markt, Endler, Hupfau, Agerer, Schedl, Richter, Zechmeister,  
456 Bicher, Heiler, Triska, Thornton, Penz, Senekowitsch, Laine, Keszei, Klimek, Nägele,  
457 Mayr, Daleiden, Steinlechner, Niederstätter, Heidinger, Rauch, Scheffknecht, Vogl,  
458 Weichlinger, Wagner, Slipko, Masseron, Radu, Allerberger, Popper, Bock, Schmid,  
459 Oberacher, Kreuzinger, Insam, Bergthaler, 2022. Viral variant-resolved wastewater  
460 surveillance of SARS-CoV-2 at national scale. *Nature Biotechnology* 40, 1814–1822.  
461 <https://doi.org/10.1038/s41587-022-01387-y>

462 Araf, Y., Akter, F., Tang, Y., Fatemi, R., Parvez, Md.S.A., Zheng, C., Hossain,  
463 Md.G., 2022. Omicron variant of SARS-CoV-2: Genomics, transmissibility, and  
464 responses to current COVID-19 vaccines. *Journal of Medical Virology* 94, 1825–  
465 1832. <https://doi.org/10.1002/jmv.27588>

466 Baaijens, J.A., Zulli, A., Ott, I.M., Petrone, M.E., Alpert, T., Fauver, J.R.,  
467 Kalinich, C.C., Vogels, C.B.F., Breban, M.I., Duvallet, C., McElroy, K., Ghaeli, N.,  
468 Imakaev, M., McKenzie-Bennett, M., Robison, K., Plocik, A., Schilling, R., Pierson,  
469 M., Littlefield, R., Spencer, M., Simen, B.B., Hanage, W.P., Grubaugh, N.D., Peccia,  
470 J., Baym, M., 2021. Variant abundance estimation for SARS-CoV-2 in wastewater  
471 using RNA-Seq quantification. Cold Spring Harbor Laboratory.

472 Chakraborty, I., Maity, P., 2020. COVID-19 outbreak: Migration, effects on  
473 society, global environment and prevention. *The Science of the Total Environment*  
474 728. <https://doi.org/10.1016/j.scitotenv.2020.138882>

475 Chen, S., Zhou, Y., Chen, Y., Gu, J., 2018. fastp: an ultra-fast all-in-one  
476 FASTQ preprocessor. *Bioinformatics* (Oxford, England) 34, i884–i890.  
477 <https://doi.org/10.1093/bioinformatics/bty560>

478 Crits-Christoph, A., 2021. Genome Sequencing of Sewage Detects  
479 Regionally Prevalent SARS-CoV-2 Variants. *mBio*.

480 de Roda Husman, A.M., et al., 2020. Wastewater-based epidemiology of  
481 SARS-CoV-2. *The Lancet Microbe*, 1(1), e1–e3.



482 Dharmadhikari, T., Rajput, V., Yadav, R., Boargaonkar, R., Patil, D., Kale,  
483 S., Kamble, S.P., Dastager, S.G., Dharne, M.S., 2022. High throughput sequencing  
484 based direct detection of SARS-CoV-2 fragments in wastewater of Pune, West India.  
485 *Science of the Total Environment* 807, 151038.  
486 <https://doi.org/10.1016/j.scitotenv.2021.151038>

487 Faria, N.R., et al., 2021. Tracking changes in SARS-CoV-2 genomes to  
488 understand the evolution of the pandemic. *Science*, 372(6537), eabd3060.

489 Gao, S., Guo, H., Luo, G., 2021. Omicron variant (B.1.1.529) of SARS CoV-  
490 2, a global urgent public health alert! *Journal of Medical Virology* 94, 1255–1256.  
491 <https://doi.org/10.1002/jmv.27491>

492 GenePath Diagnostics - Covid-19 Viral Load Calculation Tool (RUO). (n.d.).  
493 Retrieved January 30, 2023, from <https://coviquant.genepathdx.com/>

494 Global research on coronavirus disease (COVID-19) [WWW Document], n.d.  
495 URL [https://www.who.int/emergencies/diseases/novel-coronavirus-2019/global-](https://www.who.int/emergencies/diseases/novel-coronavirus-2019/global-research-on-novel-coronavirus-2019-ncov)  
496 [research-on-novel-coronavirus-2019-ncov](https://www.who.int/emergencies/diseases/novel-coronavirus-2019/global-research-on-novel-coronavirus-2019-ncov) (accessed 2.2.23).

497 Grimaldi, Panariello, Annunziata, Giuliano, Daniele, Pierri, Colantuono, Salvi,  
498 Bouché, Manfredi, Cuomo, Concilio, D., Tiberio, Fiorenza, Portella, Cimmino,  
499 Sorrentino, Fusco, Granata, Cerino, Limone, Atripaldi, Ballabio, Cacchiarelli, 2022.  
500 Improved SARS-CoV-2 sequencing surveillance allows the identification of new  
501 variants and signatures in infected patients. *Genome Medicine* 14, 1–15.  
502 <https://doi.org/10.1186/s13073-022-01098-8>

503 Grubaugh, Gangavarapu, Quick, Matteson, Jesus, D., Main, Tan, Paul,  
504 Brackney, Grewal, Gurfield, Rompay, V., Isern, Michael, Coffey, Loman, Andersen,  
505 2019. An amplicon-based sequencing framework for accurately measuring intrahost  
506 virus diversity using PrimalSeq and iVar. *Genome Biology* 20, 1–19.  
507 <https://doi.org/10.1186/s13059-018-1618-7>

508 Gu, Xie, Adam, Tsui, Chu, Chang, Cheuk, Gurung, Krishnan, Ng, Liu, Wan,  
509 Cheng, Edwards, Leung, Wu, Tsang, Leung, Cowling, Peiris, Lam, Dhanasekaran,  
510 Poon, 2022. Genomic epidemiology of SARS-CoV-2 under an elimination strategy in  
511 Hong Kong. *Nature Communications* 13, 1–10. [https://doi.org/10.1038/s41467-022-](https://doi.org/10.1038/s41467-022-28420-7)  
512 [28420-7](https://doi.org/10.1038/s41467-022-28420-7)

513 He, Lau, Wu, Deng, Wang, Hao, Lau, Wong, Guan, Tan, Mo, Chen, Liao,  
514 Chen, Hu, Zhang, Zhong, Wu, Zhao, Zhang, Cowling, Li, Leung, 2020. Temporal  
515 dynamics in viral shedding and transmissibility of COVID-19. *Nature Medicine* 26,  
516 672–675. <https://doi.org/10.1038/s41591-020-0869-5>

517 Heijnen, L., Medema, G., 2011. Surveillance of influenza A and the  
518 pandemic influenza A (H1N1) 2009 in sewage and surface water in the Netherlands -  
519 PubMed. *Journal of water and health* 9. <https://doi.org/10.2166/wh.2011.019>

520 Ho, J., Stange, C., Suhrborg, R., Wurzbacher, C., Drewes, J.E., Tiehm, A.,  
521 2022. SARS-CoV-2 wastewater surveillance in Germany: Long-term RT-digital  
522 droplet PCR monitoring, suitability of primer/probe combinations and biomarker  
523 stability. *Water Research* 210, 117977. <https://doi.org/10.1016/j.watres.2021.117977>

524 INSACOG Dashboard. Retrieved January 30, 2023, from  
525 <https://inda.rcb.ac.in/insacog/statreportlineagegraph>

526 Jahn, K., Dreifuss, D., Topolsky, I., Kull, A., Ganesanandamoorthy, P.,  
527 Fernandez-Cassi, X., Bänziger, C., Devaux, A.J., Stachler, E., Caduff, L., Cariti, F.,  
528 Corzón, A.T., Fuhrmann, L., Chen, C., Jablonski, K.P., Nadeau, S., Feldkamp, M.,  
529 Beisel, C., Aquino, C., Stadler, T., Ort, C., Kohn, T., Julian, T.R., Beerenwinkel, N.,  
530 2022. Early detection and surveillance of SARS-CoV-2 genomic variants in  
531 wastewater using COJAC. *Nature Microbiology* 7, 1151–1160.  
532 <https://doi.org/10.1038/s41564-022-01185-x>

533 Joshi, M., Kumar, M., Srivastava, V., Kumar, D., Rathore, D.S., Pandit, R.,  
534 Graham, D.W., Joshi, C.G., 2022. Genetic sequencing detected the SARS-CoV-2  
535 delta variant in wastewater a month prior to the first COVID-19 case in Ahmedabad  
536 (India). *Environmental pollution (Barking, Essex)*: 1987) 310, 119757.  
537 <https://doi.org/10.1016/j.envpol.2022.119757>

538 Karthikeyan, Levy, Hoff, D., Humphrey, Birmingham, Jepsen, Farmer, Tubb,  
539 Valles, Tribelhorn, Tsai, Aigner, Sathe, Moshiri, Henson, Mark, Hakim, Baer, Barber,  
540 Belda-Ferre, Chacón, Cheung, Cresini, Eisner, Lastrella, Lawrence, Marotz, Ngo,  
541 Ostrander, Plascencia, Salido, Seaver, Smoot, McDonald, Neuhard, Scioscia,  
542 Satterlund, Simmons, Abelman, Brenner, Bruner, Buckley, Ellison, Gattas, Gonias,  
543 Hale, Hawkins, Ikeda, Jhaveri, Johnson, Kellen, Kremer, Matthews, McLawhon,

544 Ouillet, Park, Pradenas, Reed, Riggs, Sanders, Sollenberger, Song, White, Winbush,  
545 Aceves, Anderson, Gangavarapu, Hufbauer, Kurzban, Lee, Matteson, Parker, Perkins,  
546 Ramesh, Robles-Sikisaka, Schwab, Spencer, Wohl, Nicholson, McHardy, Dimmock,  
547 Hobbs, Bakhtar, Harding, Mendoza, Bolze, Becker, Cirulli, Isaksson, Barrett, S.,  
548 Washington, Malone, Schafer, Gurfield, Stous, Fielding-Miller, Garfein, Gaines,  
549 Anderson, Martin, Schooley, Austin, MacCannell, Kingsmore, Lee, Shah, McDonald,  
550 Yu, Zeller, Fisch, Longhurst, Maysent, Pride, Khosla, Laurent, Yeo, Andersen,  
551 Knight, 2022. Wastewater sequencing reveals early cryptic SARS-CoV-2 variant  
552 transmission. *Nature* 609, 101–108. <https://doi.org/10.1038/s41586-022-05049-6>

553 Karthikeyan, S., 2021. High-Throughput Wastewater SARS-CoV-2 Detection  
554 Enables Forecasting of Community Infection Dynamics in San Diego County.  
555 *mSystems*.

556 Khandia, R., Singhal, S., Alqahtani, T., Kamal, M.A., El-Shall, N.A., Nainu,  
557 F., Desingu, P.A., Dhama, K., 2022. Emergence of SARS-CoV-2 Omicron (B.1.1.529)  
558 variant, salient features, high global health concerns and strategies to counter it amid  
559 ongoing COVID-19 pandemic. *Environmental Research* 209, 112816.  
560 <https://doi.org/10.1016/j.envres.2022.112816>

561 Kucirka, L.M., et al., 2020. Variation in transmission of SARS-CoV-2 in the  
562 United States. *Nature Medicine*, 26(9), 1567-1573.

563 Kumar, M., Patel, A.K., Shah, A.V., Raval, J., Rajpara, N., Joshi, M., Joshi,  
564 C.G., 2020. First proof of the capability of wastewater surveillance for COVID-19 in  
565 India through detection of genetic material of SARS-CoV-2. *The Science of the total*  
566 *environment* 746, 141326. <https://doi.org/10.1016/j.scitotenv.2020.141326>

567 Lamba, S., Ganesan, S., Daroch, N., Paul, K., Joshi, S.G., Sreenivas, D.,  
568 Nataraj, A., Srikantaiah, V., Mishra, R., Ramakrishnan, U., Ishtiaq, F., 2023. SARS-  
569 CoV-2 infection dynamics and genomic surveillance to detect variants in wastewater -  
570 a longitudinal study in Bengaluru, India. *The Lancet regional health. Southeast Asia*  
571 100151. <https://doi.org/10.1016/j.lansea.2023.100151>

572 Landgraff, C., Wang, L.Y.R., Buchanan, C., Wells, M., Schonfeld, J.,  
573 Bessonov, K., Ali, J., Robert, E., Nadon, C., 2021. Metagenomic sequencing of  
574 municipal wastewater provides a near-complete SARS-CoV-2 genome sequence

575 identified as the B.1.1.7 variant of concern from a Canadian municipality concurrent  
576 with an outbreak. Cold Spring Harbor Laboratory.

577 Li, Durbin, 2010. Fast and accurate long-read alignment with Burrows–  
578 Wheeler transform. *Bioinformatics* 26, 589–595.  
579 <https://doi.org/10.1093/bioinformatics/btp698>

580 Li, H., Liu, S.-M., Yu, X.-H., Tang, S.-L., Tang, C.-K., 2020. Coronavirus  
581 disease 2019 (COVID-19): current status and future perspectives. *International*  
582 *Journal of Antimicrobial Agents* 55.  
583 <https://doi.org/10.1016/j.ijantimicag.2020.105951>

584 Li, Handsaker, Wysoker, Fennell, Ruan, Homer, Marth, Abecasis, Durbin,  
585 2009. The Sequence Alignment/Map format and SAMtools. *Bioinformatics* 25, 2078–  
586 2079. <https://doi.org/10.1093/bioinformatics/btp352>

587 Li, R., et al., 2020. Substantial undocumented infection facilitates the rapid  
588 dissemination of novel coronavirus (SARS-CoV-2). *Science*, 368(6491), 489–493.

589 Maida, C.M., Amodio, E., Mazzucco, W., Rosa, G.L., Lucentini, L.,  
590 Suffredini, E., Palermo, M., Andolina, G., Iaia, F.R., Merlo, F., Chiarelli, M.G.,  
591 Siragusa, A., Vitale, F., Tramuto, F., SARI Collaboration Group, 2022. Wastewater-  
592 based epidemiology for early warning of SARS-COV-2 circulation: A pilot study  
593 conducted in Sicily, Italy. *International Journal of Hygiene and Environmental Health*  
594 242. <https://doi.org/10.1016/j.ijheh.2022.113948>

595 Mercer, T.R., Salit, M., 2021. Testing at scale during the COVID-19 pandemic.  
596 *Nature Reviews. Genetics* 22. <https://doi.org/10.1038/s41576-021-00360-w>

597 Morvan, Giacomo, Souque, Wade, Hoffmann, Pouwels, Lilley, Singer, Porter,  
598 Evens, Walker, Bunce, Engeli, Grimsley, O’Reilly, Danon, 2022. An analysis of 45  
599 large-scale wastewater sites in England to estimate SARS-CoV-2 community  
600 prevalence. *Nature Communications* 13, 1–9. [https://doi.org/10.1038/s41467-022-](https://doi.org/10.1038/s41467-022-31753-y)  
601 31753-y

602 Nyberg, T., Ferguson, N.M., Nash, S.G., Webster, H.H., Flaxman, S.,  
603 Andrews, N., Hinsley, W., Bernal, J.L., Kall, M., Bhatt, S., Blomquist, P., Zaidi, A.,  
604 Volz, E., Aziz, N.A., Harman, K., Funk, S., Abbott, S., Nyberg, T., Ferguson, N.M.,

605 Nash, S.G., Webster, H.H., Flaxman, S., Andrews, N., Hinsley, W., Bernal, J.L., Kall,  
606 M., Bhatt, S., Blomquist, P., Zaidi, A., Volz, E., Aziz, N.A., Harman, K., Funk, S.,  
607 Abbott, S., Hope, R., Charlett, A., Chand, M., Ghani, A.C., Seaman, S.R., Dabrera, G.,  
608 Angelis, D.D., Presanis, A.M., Thelwall, S., Hope, R., Charlett, A., Chand, M., Ghani,  
609 A.C., Seaman, S.R., Dabrera, G., Angelis, D.D., Presanis, A.M., Thelwall, S., 2022.  
610 Comparative analysis of the risks of hospitalisation and death associated with SARS-  
611 CoV-2 omicron (B.1.1.529) and delta (B.1.617.2) variants in England: a cohort study.  
612 *The Lancet* 399, 1303–1312. [https://doi.org/10.1016/S0140-6736\(22\)00462-7](https://doi.org/10.1016/S0140-6736(22)00462-7)

613 Peccia, J., Zulli, A., Brackney, D.E., Grubaugh, N.D., Kaplan, E.H.,  
614 Casanovas-Massana, A., Ko, A.I., Malik, A.A., Wang, D., Wang, M., Warren, J.L.,  
615 Weinberger, D.M., Arnold, W., Omer, S.B., 2020b. Measurement of SARS-CoV-2  
616 RNA in wastewater tracks community infection dynamics. *Nature biotechnology* 38,  
617 1164–1167. <https://doi.org/10.1038/s41587-020-0684-z>

618 Polo, D., Quintela-Baluja, M., Corbishley, A., Jones, D.L., Singer, A.C.,  
619 Graham, D.W., Romalde, J.L., 2020. Making waves: Wastewater-based epidemiology  
620 for COVID-19 – approaches and challenges for surveillance and prediction. *Water*  
621 *Research* 186, 116404. <https://doi.org/10.1016/j.watres.2020.116404>

622 Prado, T., Fumian, T.M., Mannarino, C.F., Resende, P.C., Motta, F.C.,  
623 Eppinghaus, A.L.F., Chagas do Vale, V.H., Braz, R.M.S., de Andrade, J. da S.R.,  
624 Maranhão, A.G., Miagostovich, M.P., 2021. Wastewater-based epidemiology as a  
625 useful tool to track SARS-CoV-2 and support public health policies at municipal level  
626 in Brazil. *Water research* 191, 116810. <https://doi.org/10.1016/j.watres.2021.116810>

627 Prakash, S., Shukla, S., Mishra, H., Prakash, O., Khan, D.N., Pandey, A.,  
628 Reddy, D.H., Jain, A., 2021. SARS-CoV-2 –RNA persists longer in faecal sample as  
629 compared to nasal and throat swab samples of COVID-19 patients'; an observational  
630 study. *Indian Journal of Medical Microbiology* 39.  
631 <https://doi.org/10.1016/j.ijmmb.2020.10.012>

632 Rambaut, A., et al., 2020. The proximal origin of SARS-CoV-2. *Nature*  
633 *Medicine*, 26(4), 450-452.

634 Randazzo, W., Truchado, P., Cuevas-Ferrando, E., Simón, P., Allende, A.,  
635 Sánchez, G., 2020. SARS-CoV-2 RNA in wastewater anticipated COVID-19

636 occurrence in a low prevalence area. *Water Research* 181, 115942.  
637 <https://doi.org/10.1016/j.watres.2020.115942>

638 Ranjan, R., 2022. *Omicron Impact in India: Analysis of the Ongoing*  
639 *COVID-19 Third Wave Based on Global Data*. Cold Spring Harbor Laboratory.

640 Rosa, L., Libera, D., Iaconelli, Ciccaglione, Bruni, Taffon, Equestre, Alfonsi,  
641 Rizzo, Tosti, Chironna, Romanò, Zanetti, Muscillo, 2014. Surveillance of hepatitis A  
642 virus in urban sewages and comparison with cases notified in the course of an  
643 outbreak, Italy 2013. *BMC Infectious Diseases* 14, 1–11.  
644 <https://doi.org/10.1186/1471-2334-14-419>

645 Shang, Y., Li, H., Zhang, R., 2021. Effects of Pandemic Outbreak on  
646 Economies: Evidence From Business History Context. *Frontiers in Public Health* 9.  
647 <https://doi.org/10.3389/fpubh.2021.632043>

648 Sharifi, A., Khavarian-Garmsir, A.R., 2020. The COVID-19 pandemic:  
649 Impacts on cities and major lessons for urban planning, design, and management. *The*  
650 *Science of the Total Environment* 749.  
651 <https://doi.org/10.1016/j.scitotenv.2020.142391>

652 Shrestha, L.B., Tedla, N., Bull, R.A., 2021. Broadly-Neutralizing Antibodies  
653 Against Emerging SARS-CoV-2 Variants. *Frontiers in Immunology* 12.  
654 <https://doi.org/10.3389/fimmu.2021.752003>

655 Srivastava, V., Gupta, S., Patel, A.K., Joshi, M., Kumar, M., 2021.  
656 Reflections of COVID-19 cases in the wastewater loading of SARS-CoV-2 RNA: A  
657 case of three major cities of Gujarat, India. *Case Studies in Chemical and*  
658 *Environmental Engineering* 4. <https://doi.org/10.1016/j.cscee.2021.100115>

659 Stephens, N., Béen, F., Savic, D., 2022. An Analysis of SARS-CoV-2 in  
660 Wastewater to Evaluate the Effectiveness of Nonpharmaceutical Interventions against  
661 COVID-19 in The Netherlands. *ACS ESand#38;T Water* 2, 2158–2166.  
662 <https://doi.org/10.1021/acsestwater.2c00071>

663 Tiwari, A., Lipponen, A., Hokajärvi, A.-M., Luomala, O., Sarekoski, A.,  
664 Rytönen, A., Österlund, P., Al-Hello, H., Juutinen, A., Miettinen, I.T., Savolainen-  
665 Kopra, C., Pitkänen, T., 2022b. Detection and quantification of SARS-CoV-2 RNA in

666 wastewater influent in relation to reported COVID-19 incidence in Finland. Water  
667 Research 215, 118220. <https://doi.org/10.1016/j.watres.2022.118220>

668 Tracking SARS-CoV-2 variants [WWW Document], n.d. URL  
669 <https://www.who.int/activities/tracking-SARS-CoV-2-variants> (accessed 2.10.23).

670 Valieris, Drummond, Defelicibus, Dias-Neto, Rosales, Silva, T. da, 2022. A  
671 mixture model for determining SARS-Cov-2 variant composition in pooled samples.  
672 *Bioinformatics* 38, 1809–1815. <https://doi.org/10.1093/bioinformatics/btac047>

673 Valieris, Drummond, Defelicibus, Dias-Neto, Rosales, Silva, T. da, 2022b. A  
674 mixture model for determining SARS-Cov-2 variant composition in pooled samples.  
675 *Bioinformatics* 38, 1809–1815. <https://doi.org/10.1093/bioinformatics/btac047>

676 van der Meer, L.M., et al., 2020. Wastewater-based surveillance for SARS-  
677 CoV-2: The way forward. *Journal of Virological Methods*, 282, 113907.

678 Wilton, T., 2021. Rapid Increase of SARS-CoV-2 Variant B.1.1.7 Detected  
679 in Sewage Samples from England between October 2020 and January 2021.  
680 *mSystems*.

681 Yadav, P.D., Kumar, S., 2022. Global emergence of SARS-CoV-2 variants:  
682 new foresight needed for improved vaccine efficacy. *The Lancet Infectious Diseases*  
683 22, 298–299. [https://doi.org/10.1016/s1473-3099\(21\)00687-3](https://doi.org/10.1016/s1473-3099(21)00687-3)

684 Zhang, L., 2022. Broadly neutralizing antibodies against SARS-CoV-2  
685 variants. *National Science Open* 1, 20220005. <https://doi.org/10.1360/nso/20220005>

686

687

688 **Fig.1.** Geographical locations of the sewage treatment facilities sampled in Pune city  
689 (India).

690 **Fig.2** Temporal trends of SARS-CoV-2 viral load in relation to COVID-19 cases and  
691 the relative abundance of SARS-CoV-2 variants in sewer shed sites (Bhairobanala,  
692 Bopodi, Erandwane, Kharadi, Baner).

693 **Fig.3** Temporal trends of SARS-CoV-2 viral load in relation to COVID-19 cases and  
694 the relative abundance of SARS-CoV-2 variants in sewer shed sites (New Naidu, Old  
695 Naidu, Tanajiwadi, Vitthalwadi, Mundhwa).

696 **Fig.4** Relative abundance of SARS-CoV-2 lineages in wastewater according to date  
697 of collection and sewer shed sites in Pune.

698 **Fig.5** Temporal trends of dominant variants of SARS-CoV-2 in wastewater samples  
699 between November 2021 and April 2022.



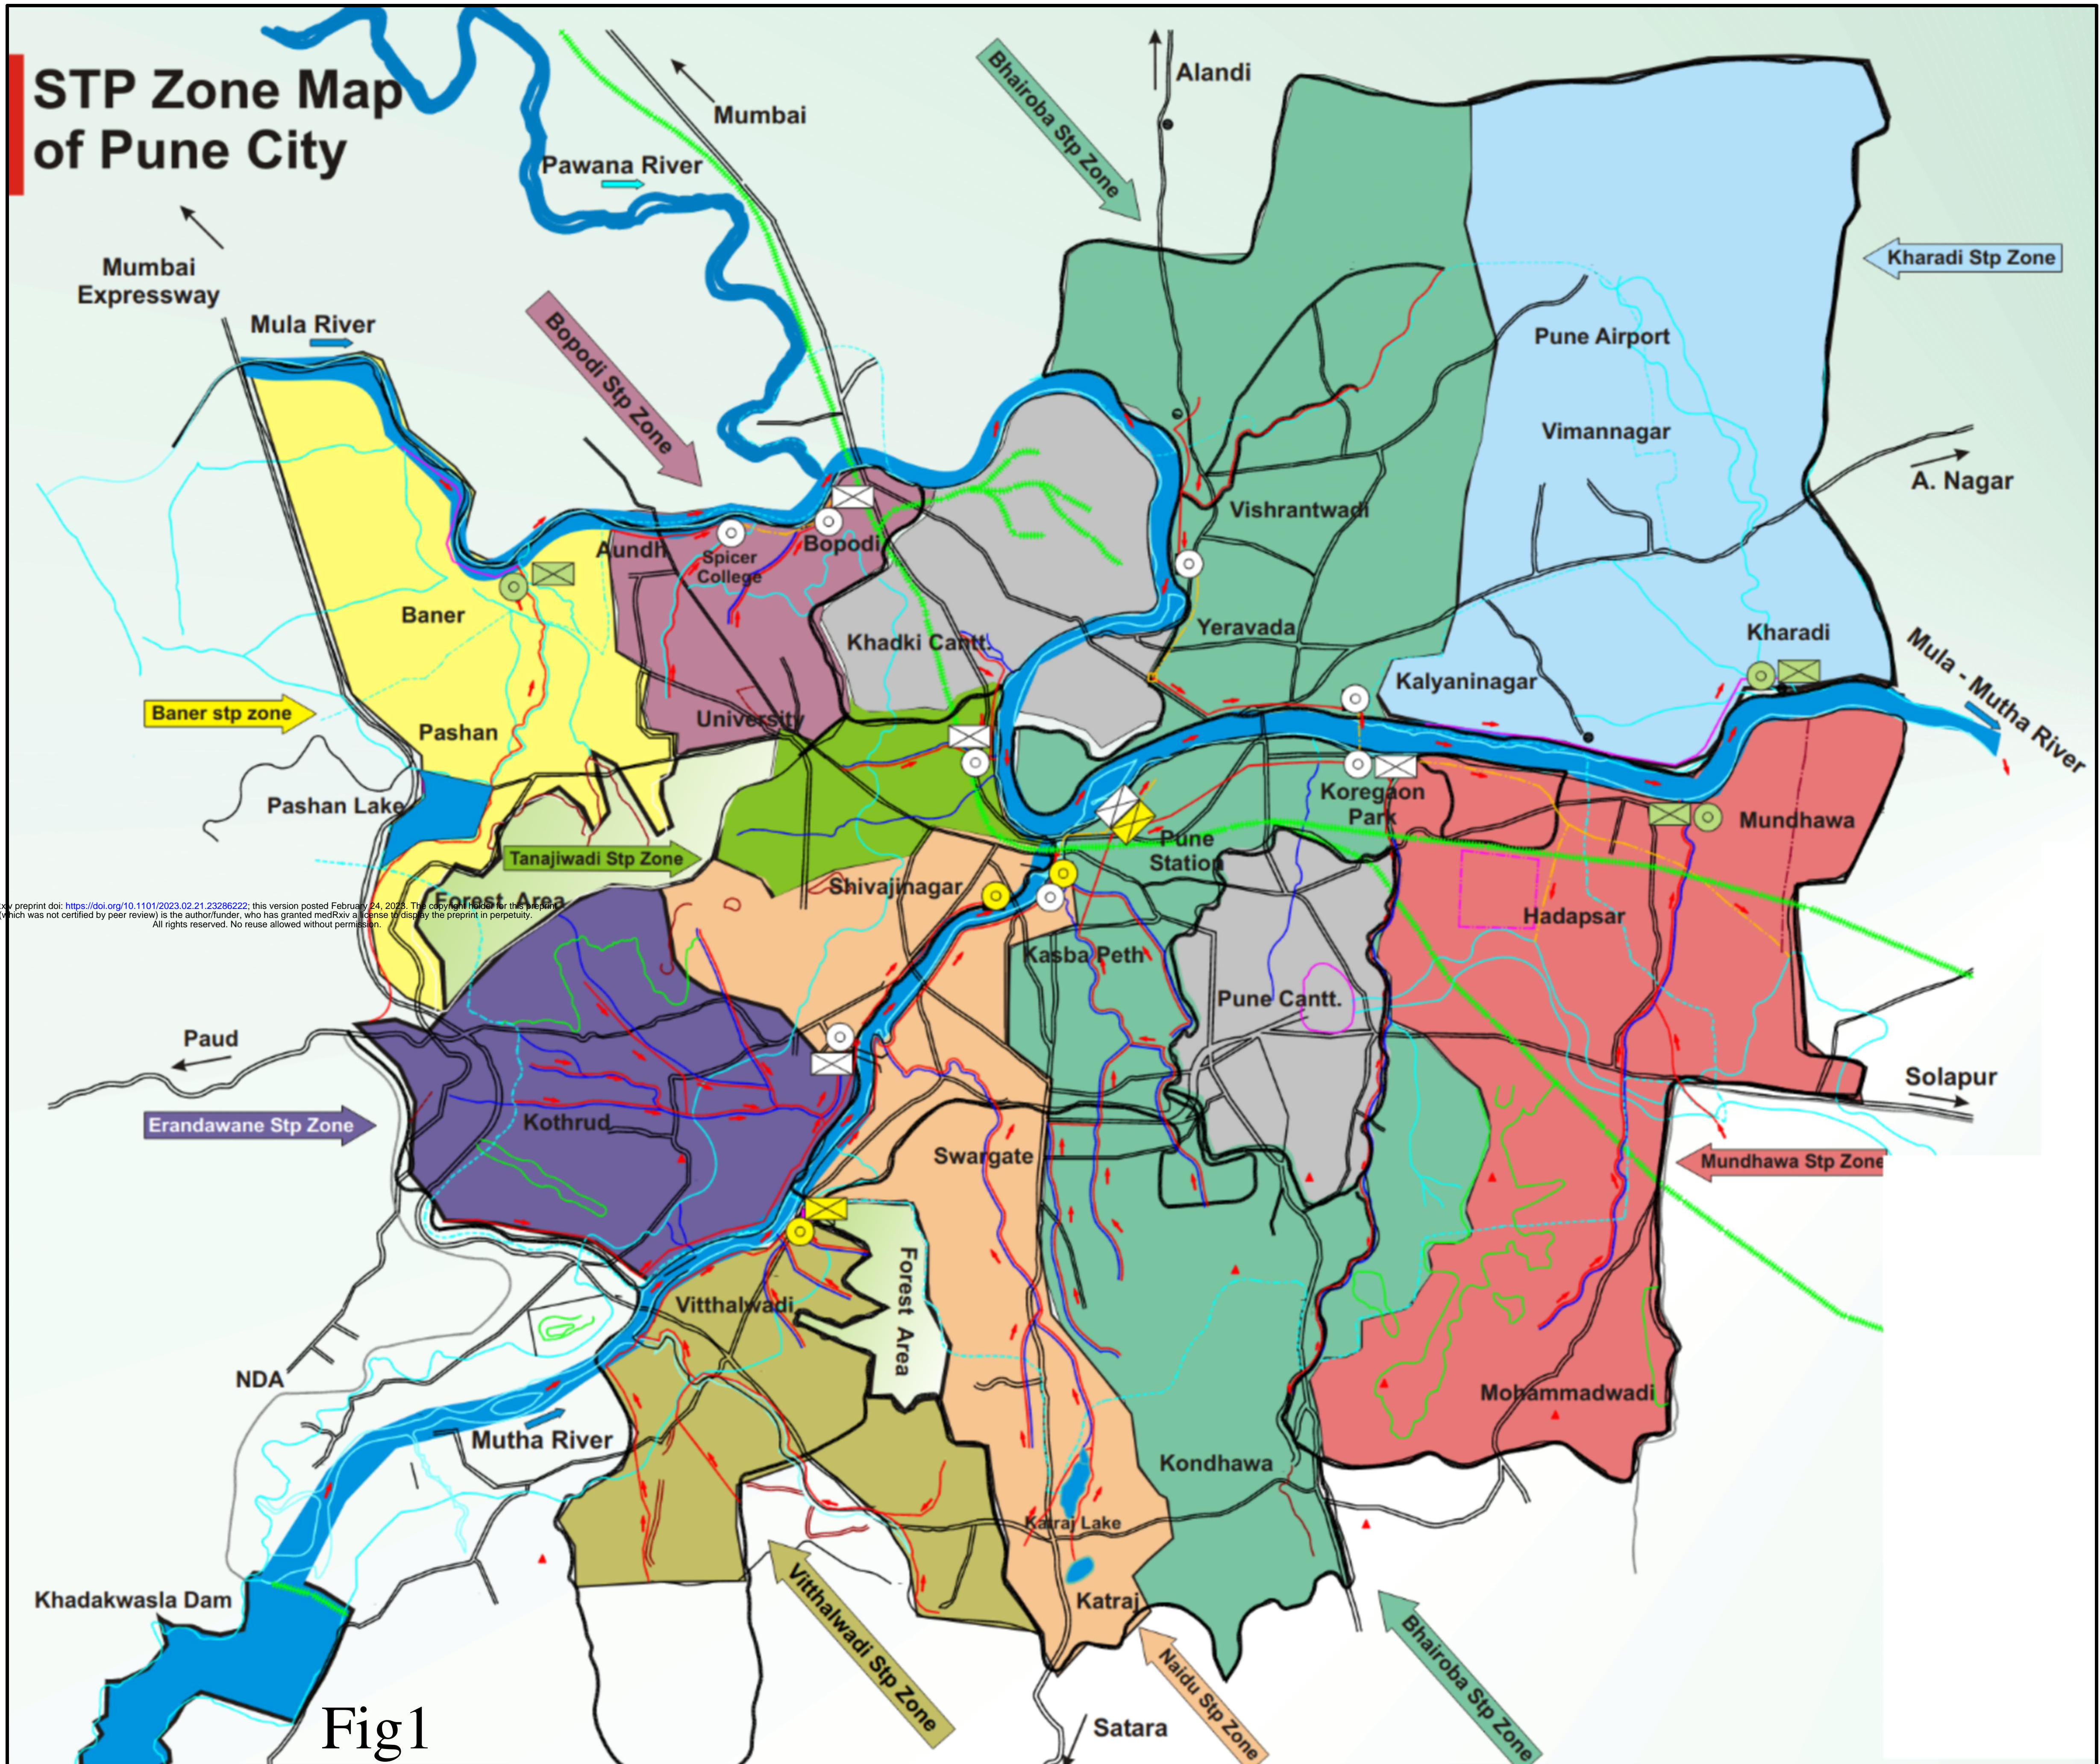

## Sewage Treatment Plant : PUNE-INDIA

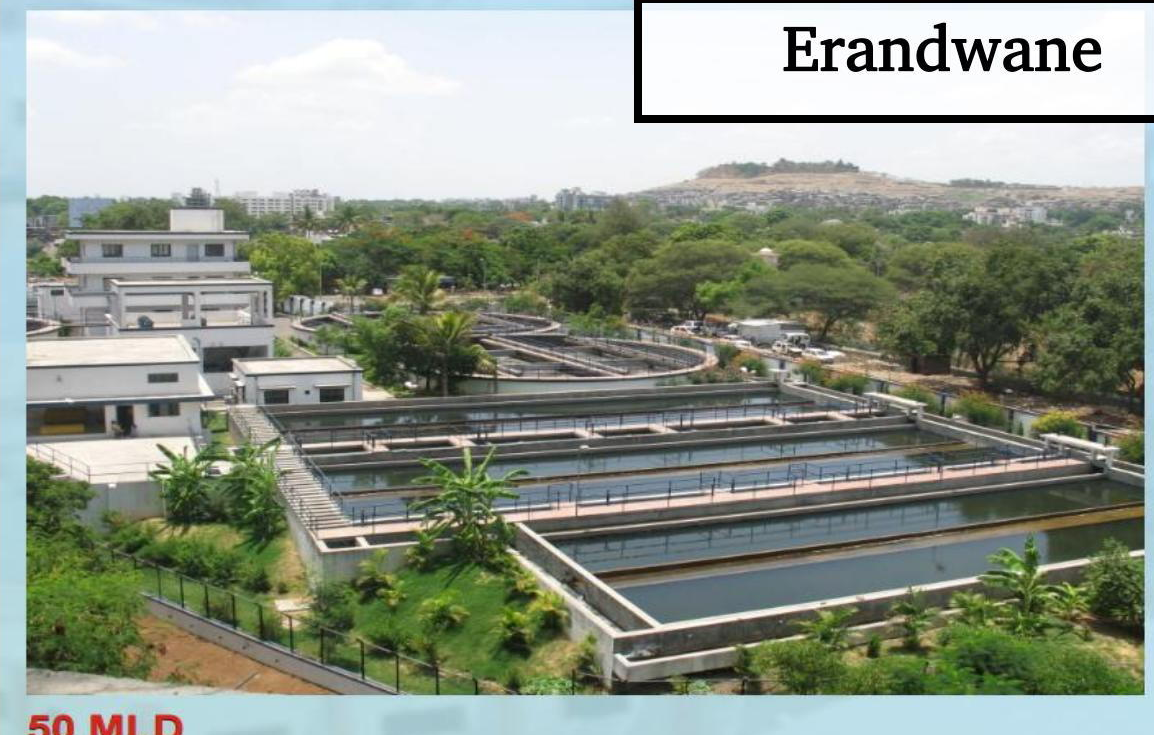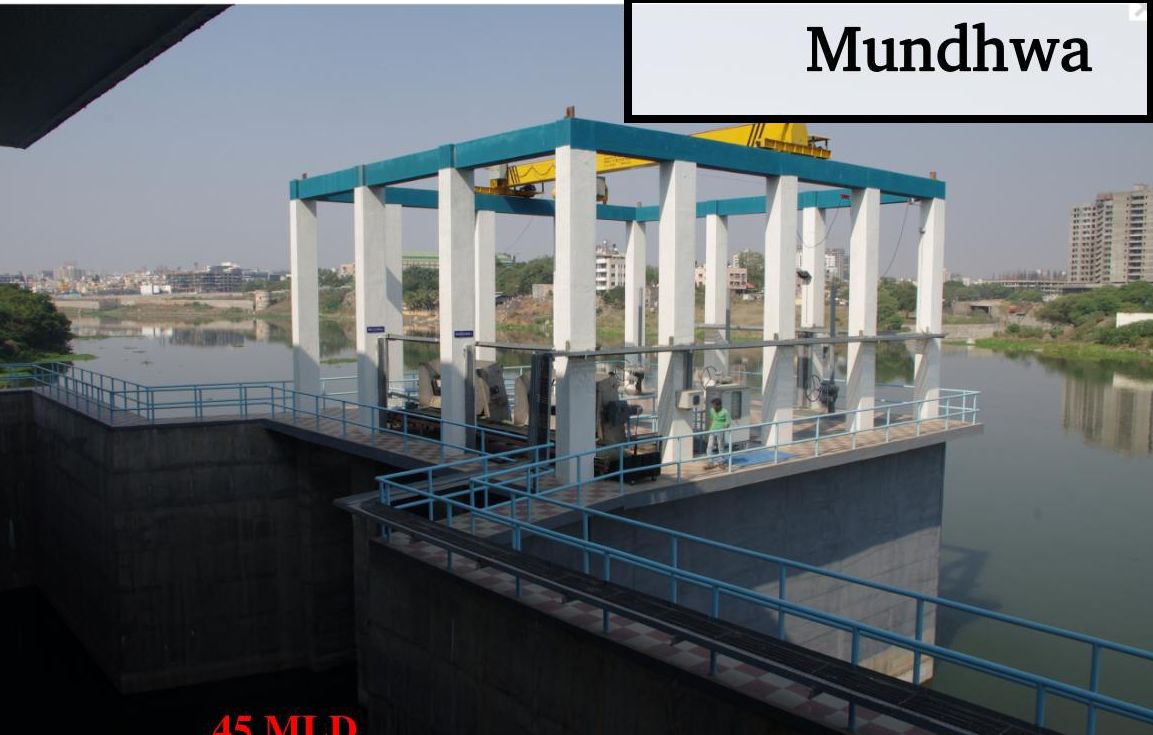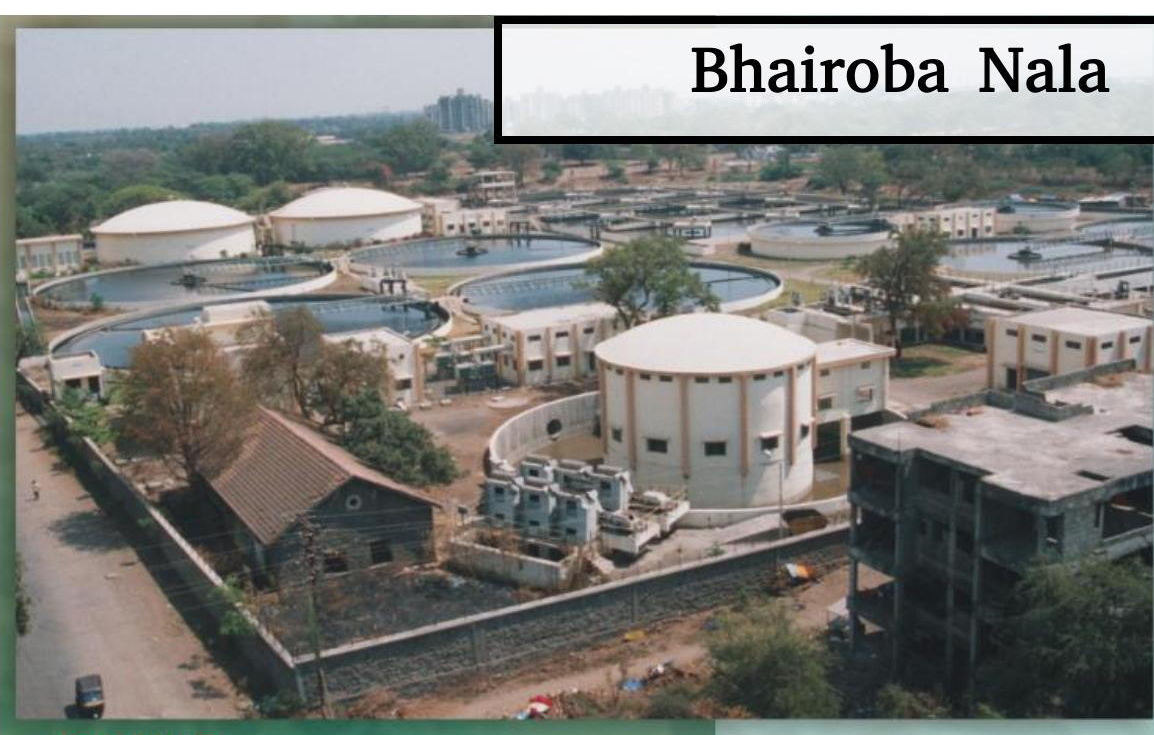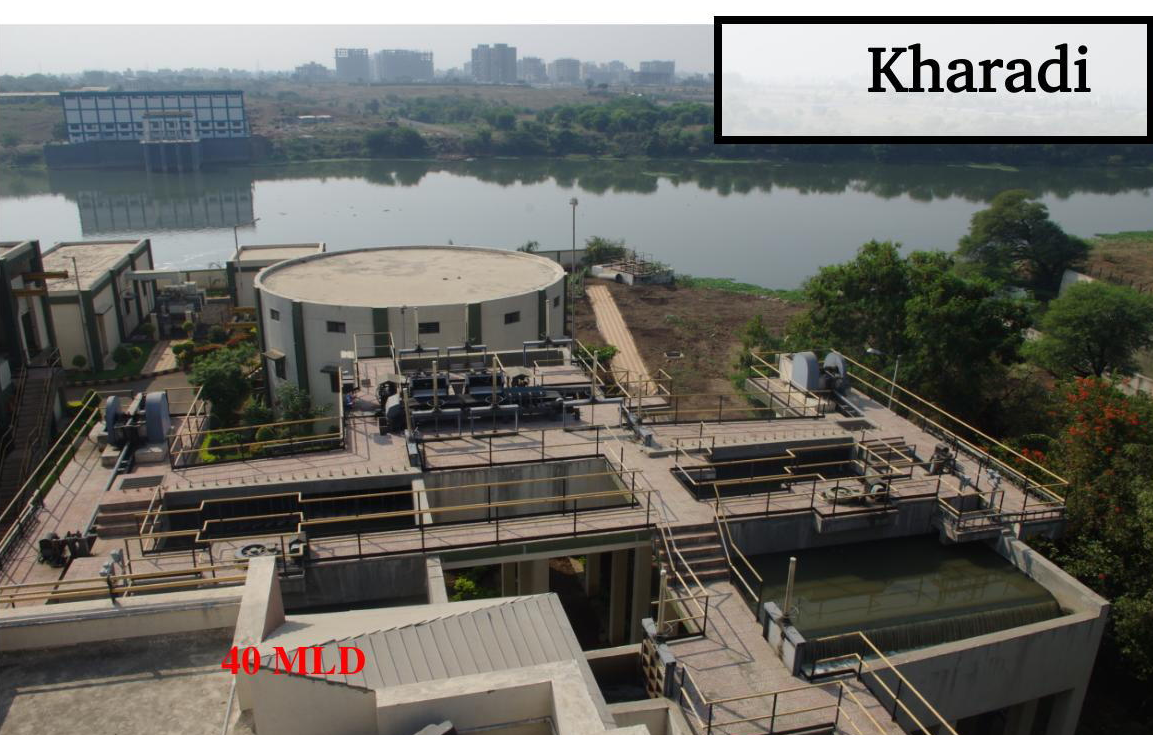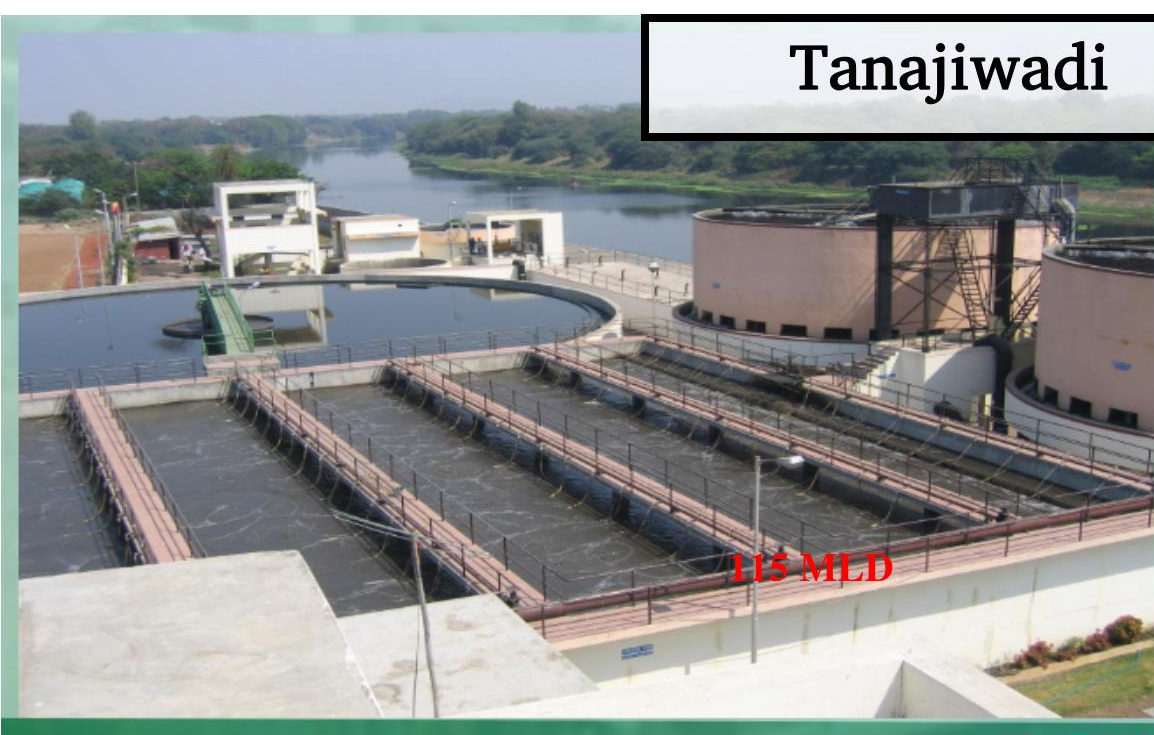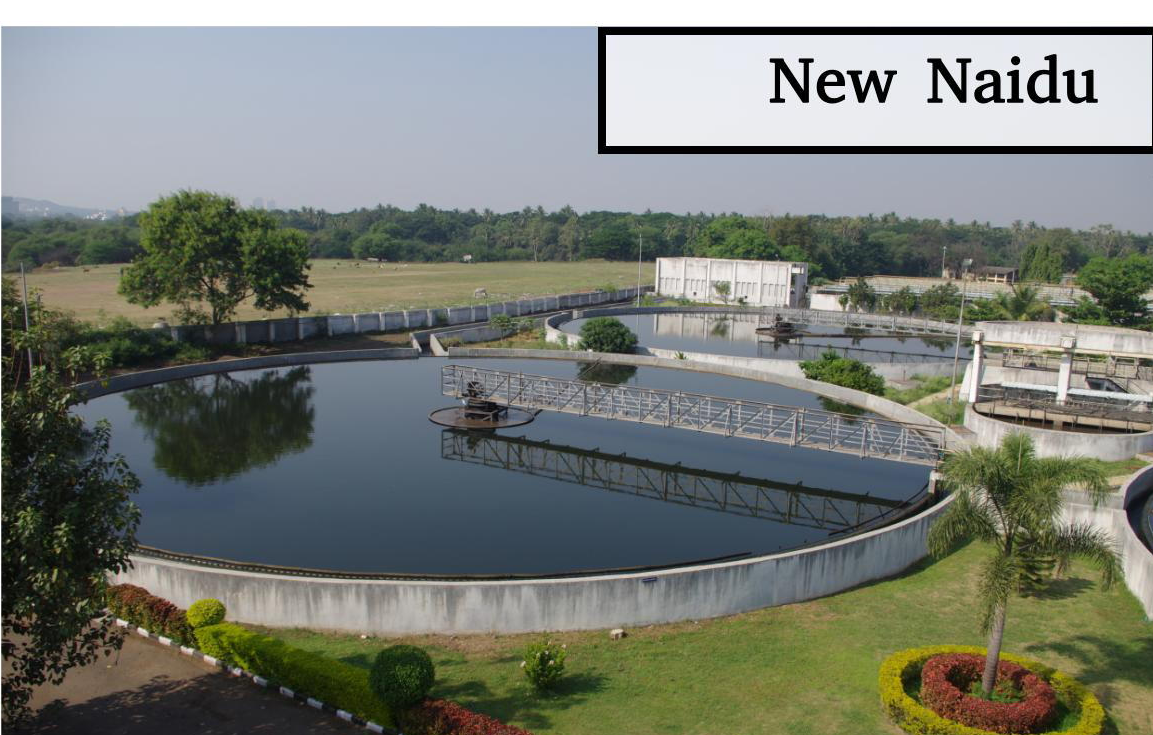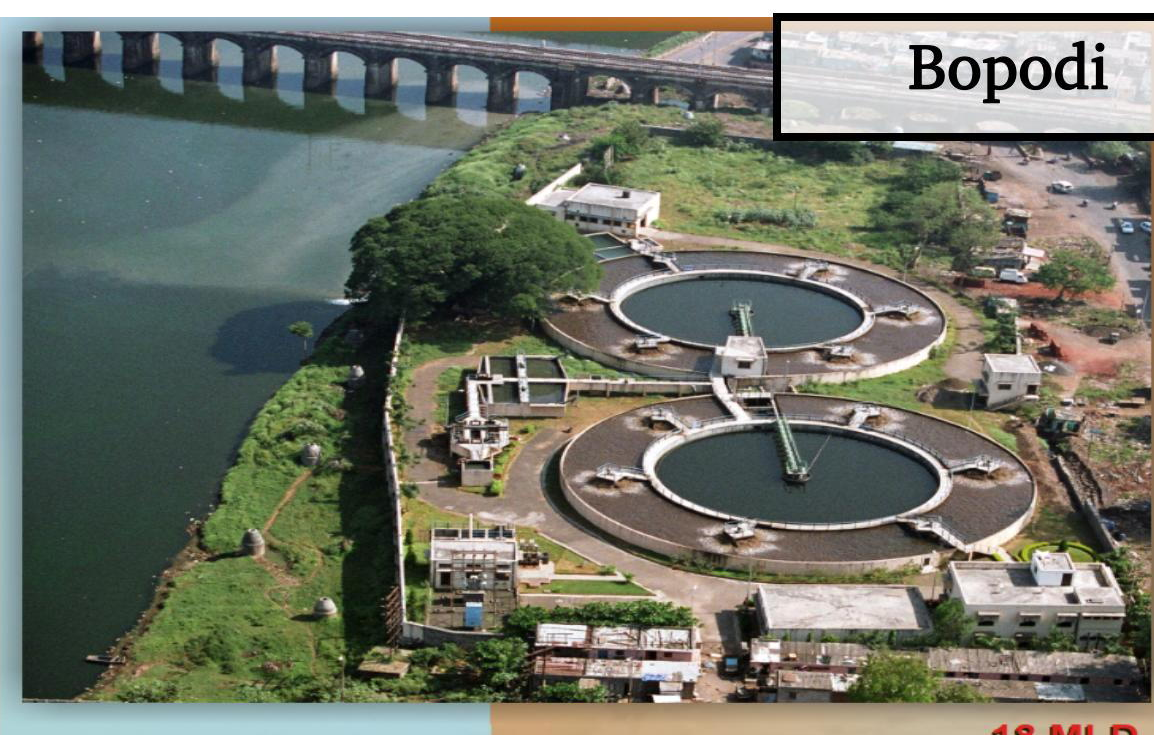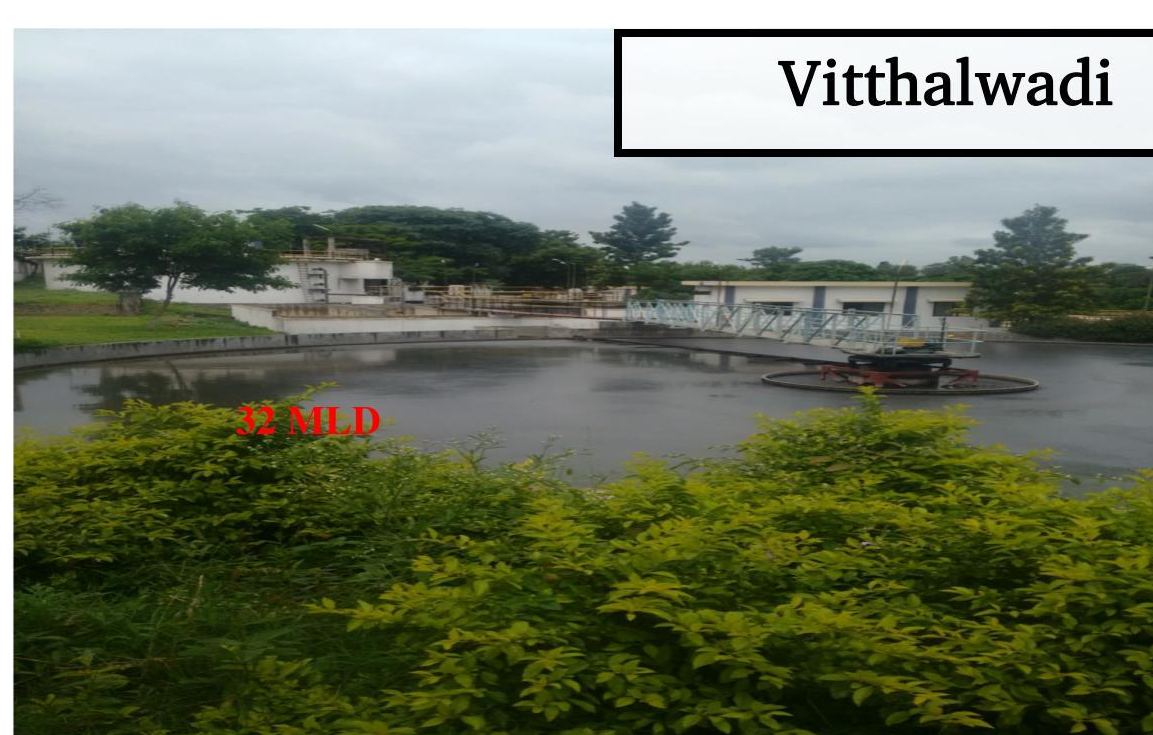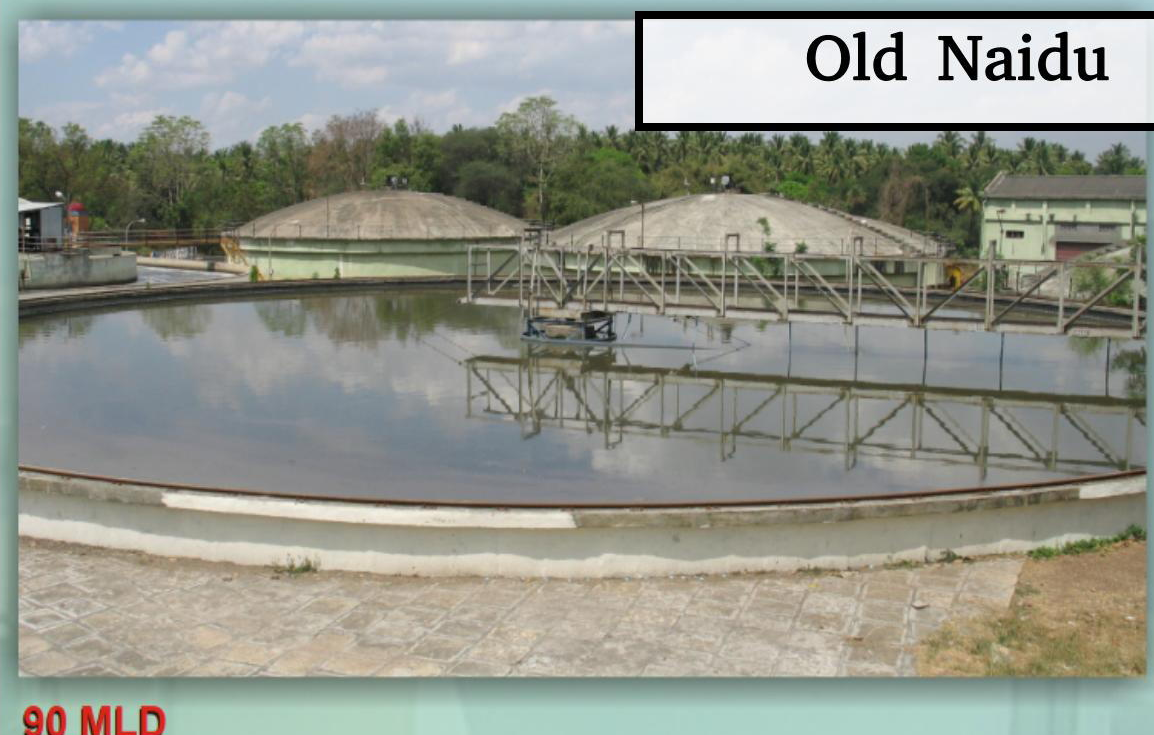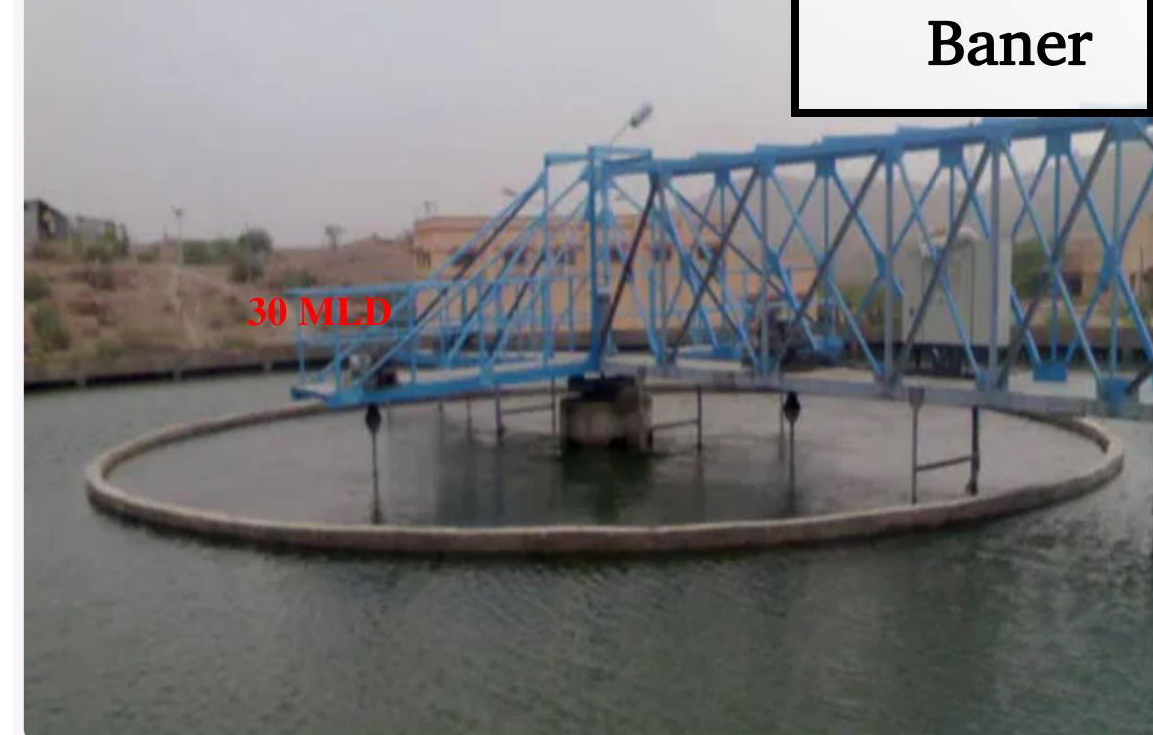



STP : New Naidu

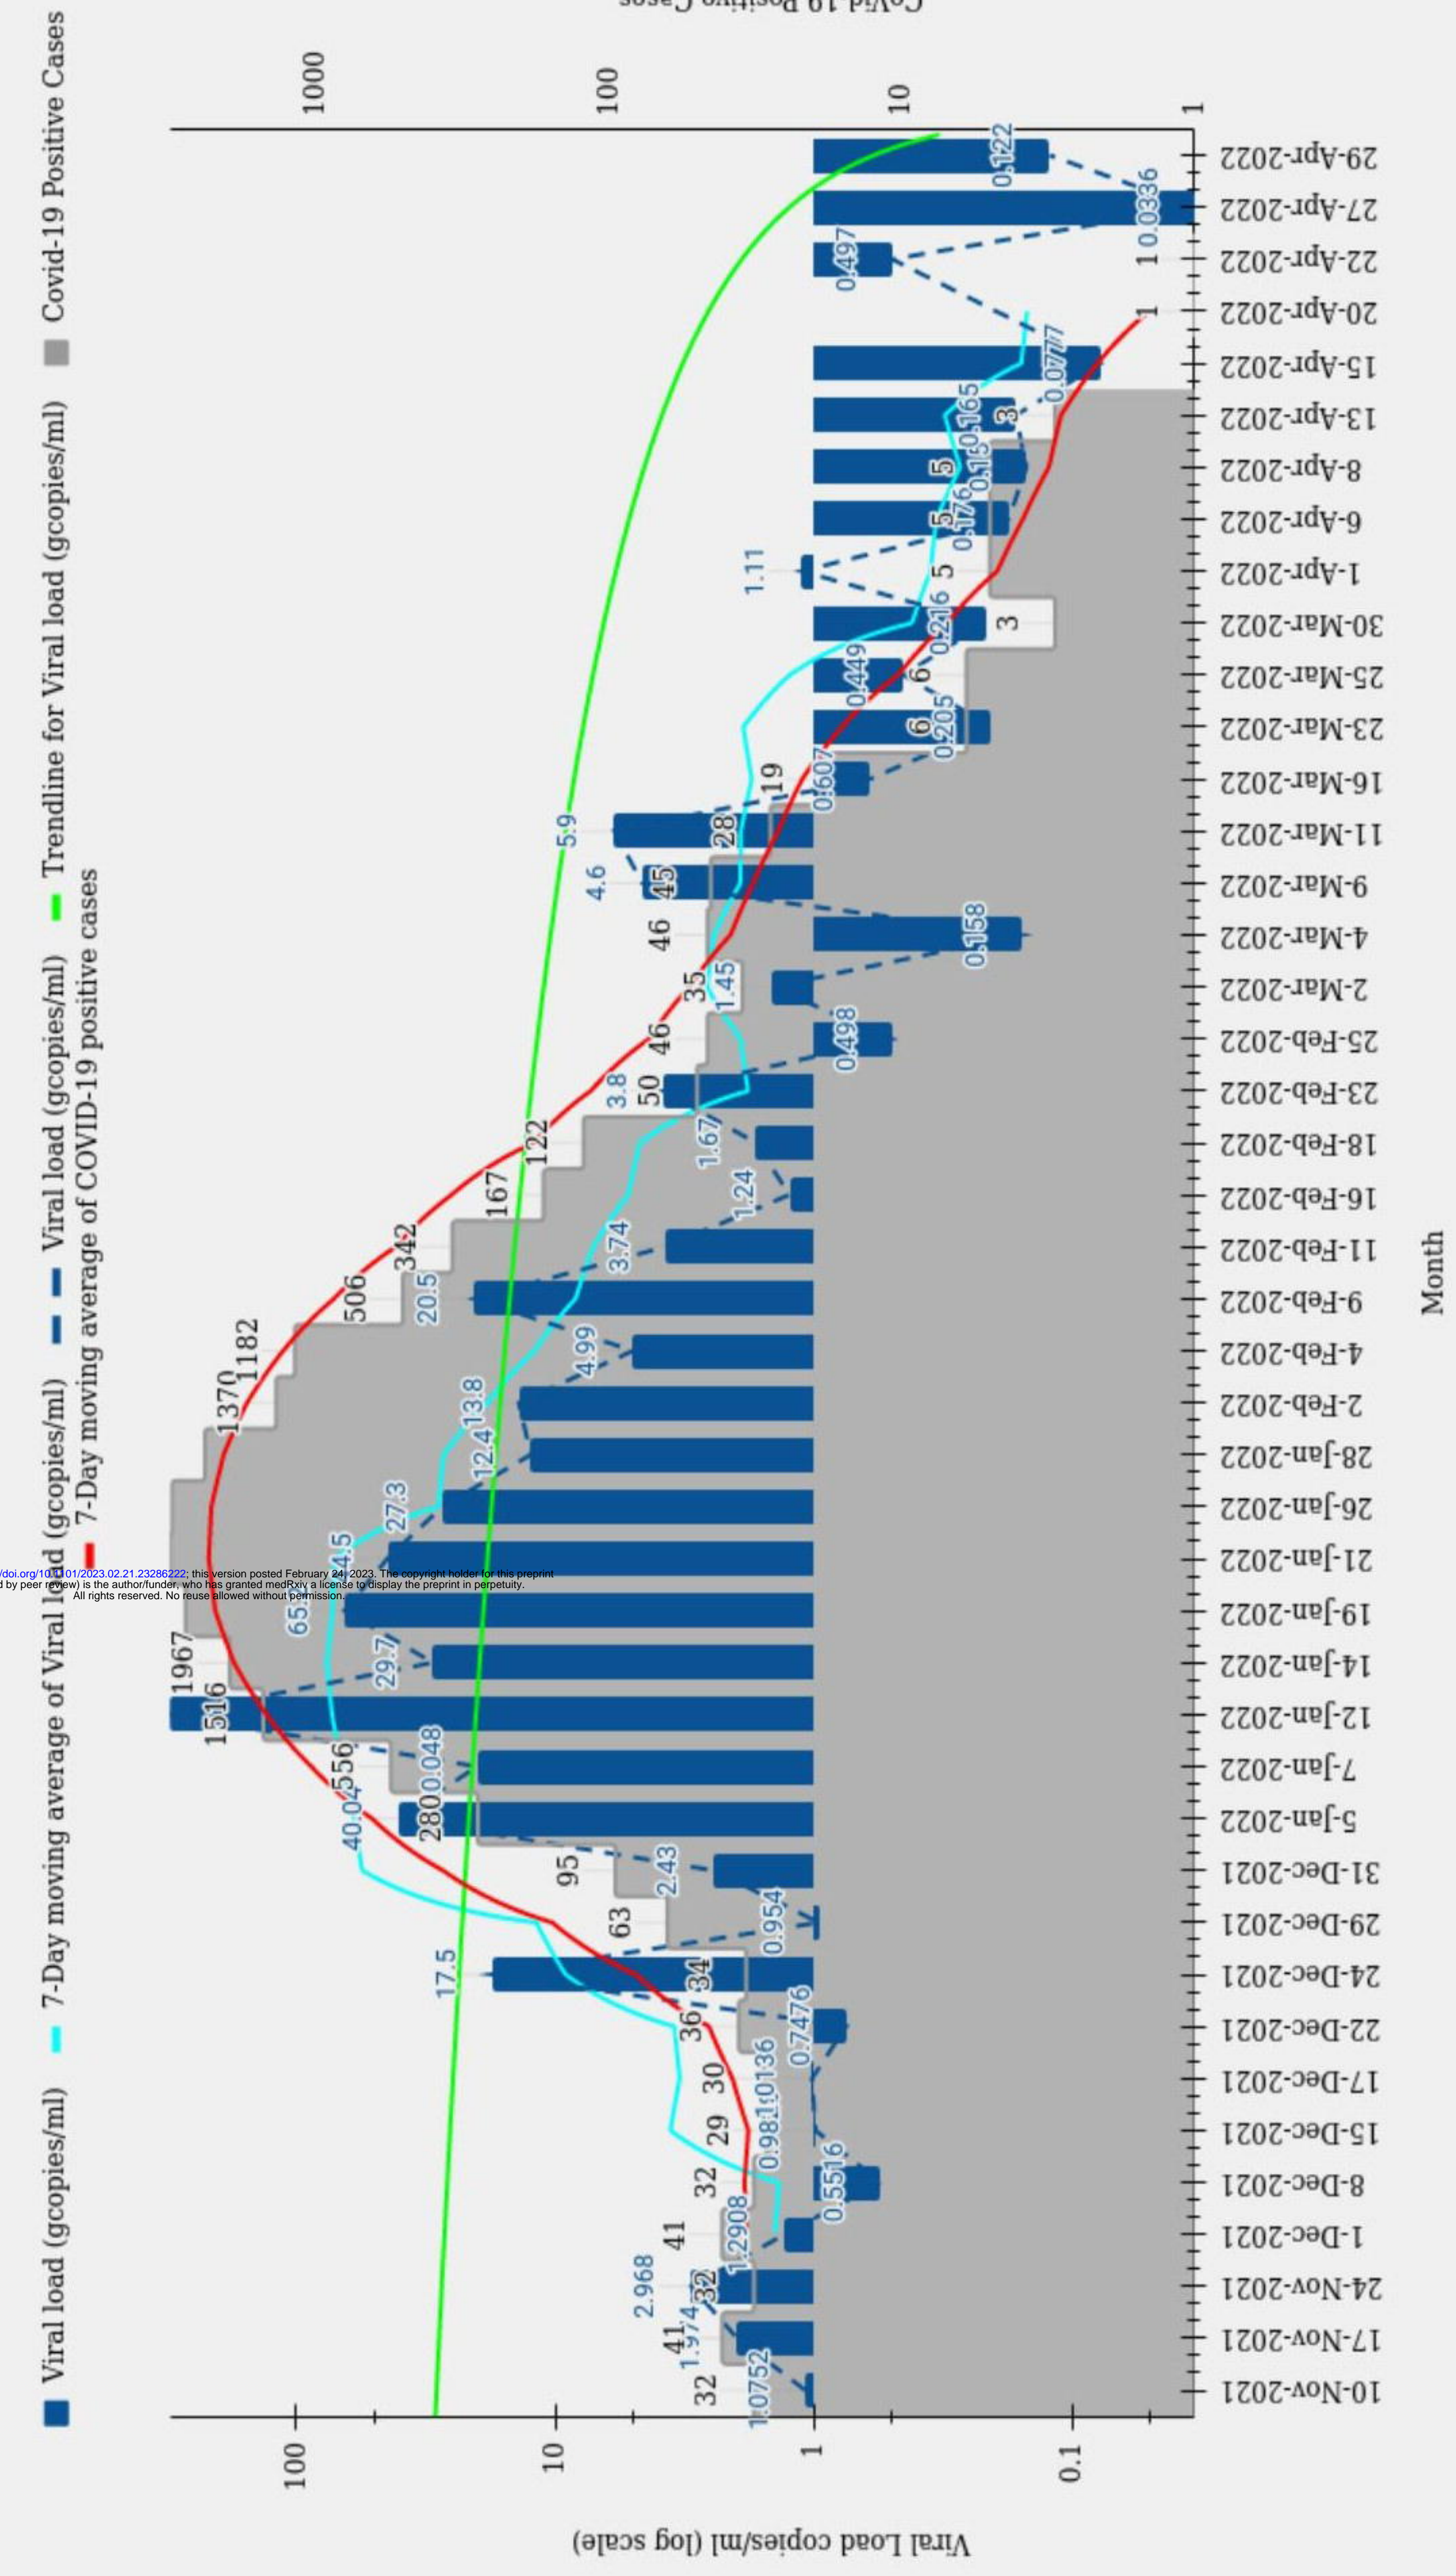

STP : New Naidu

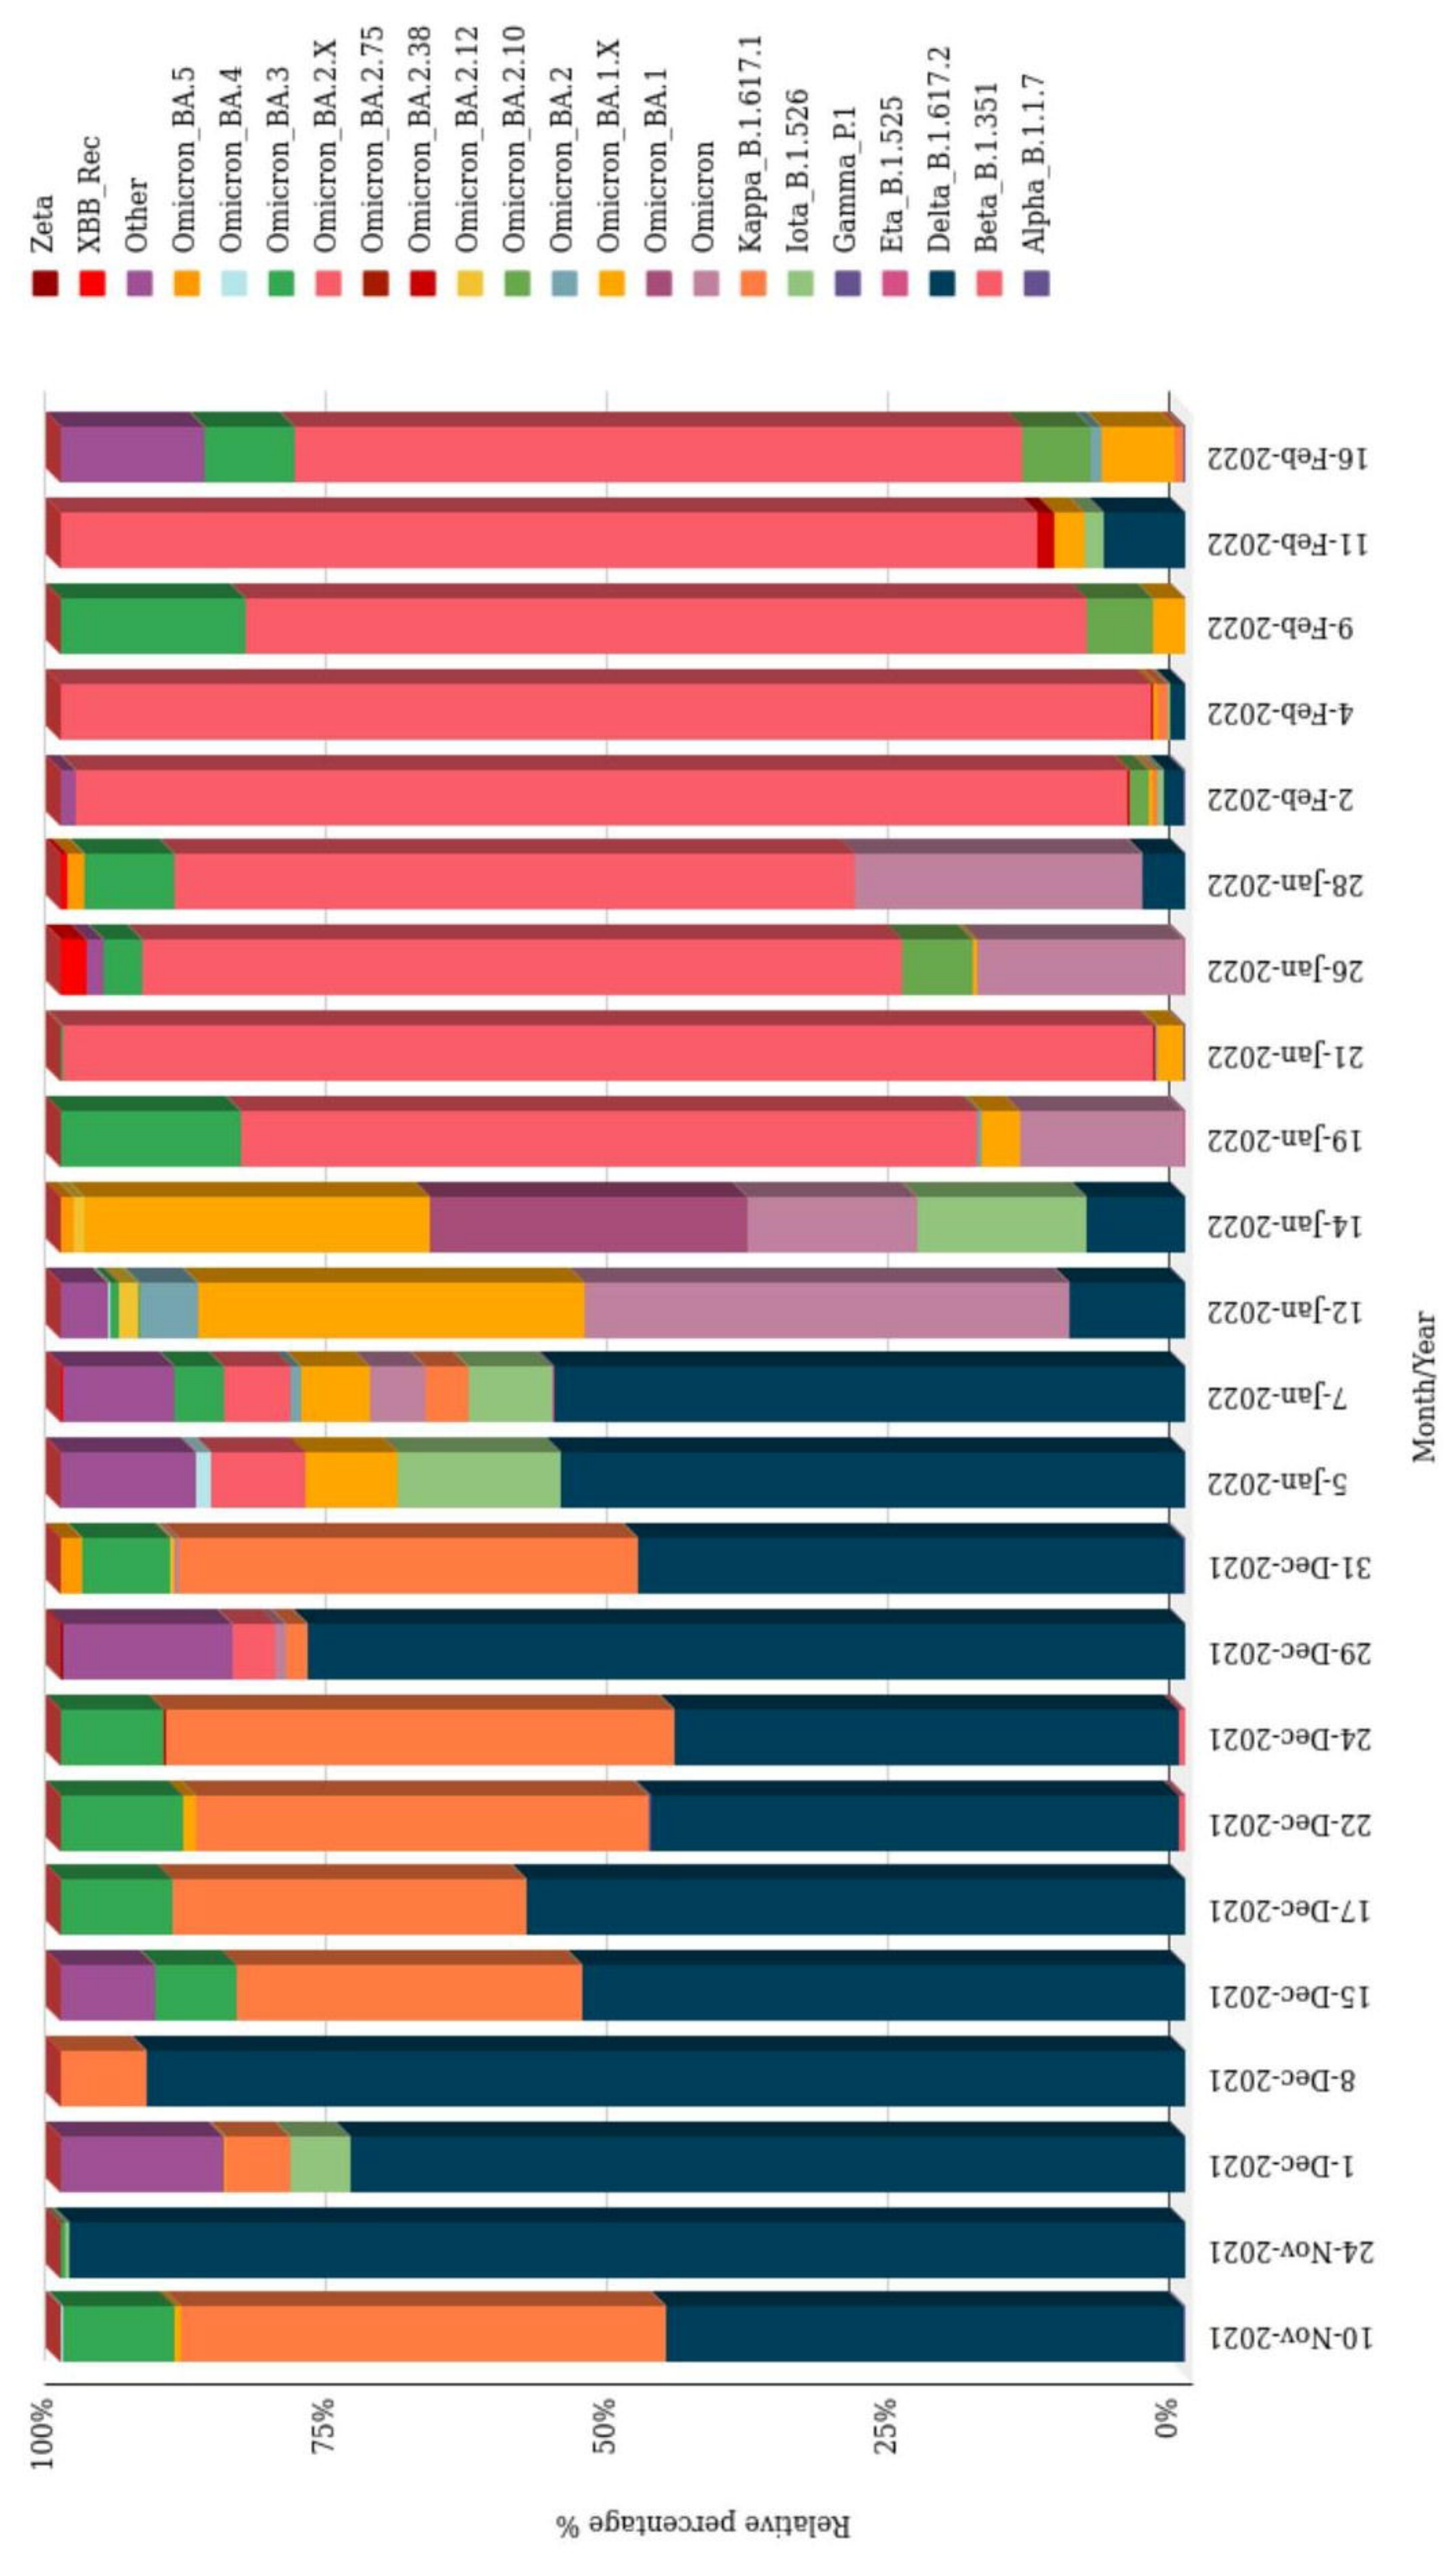

STP : Old Naidu

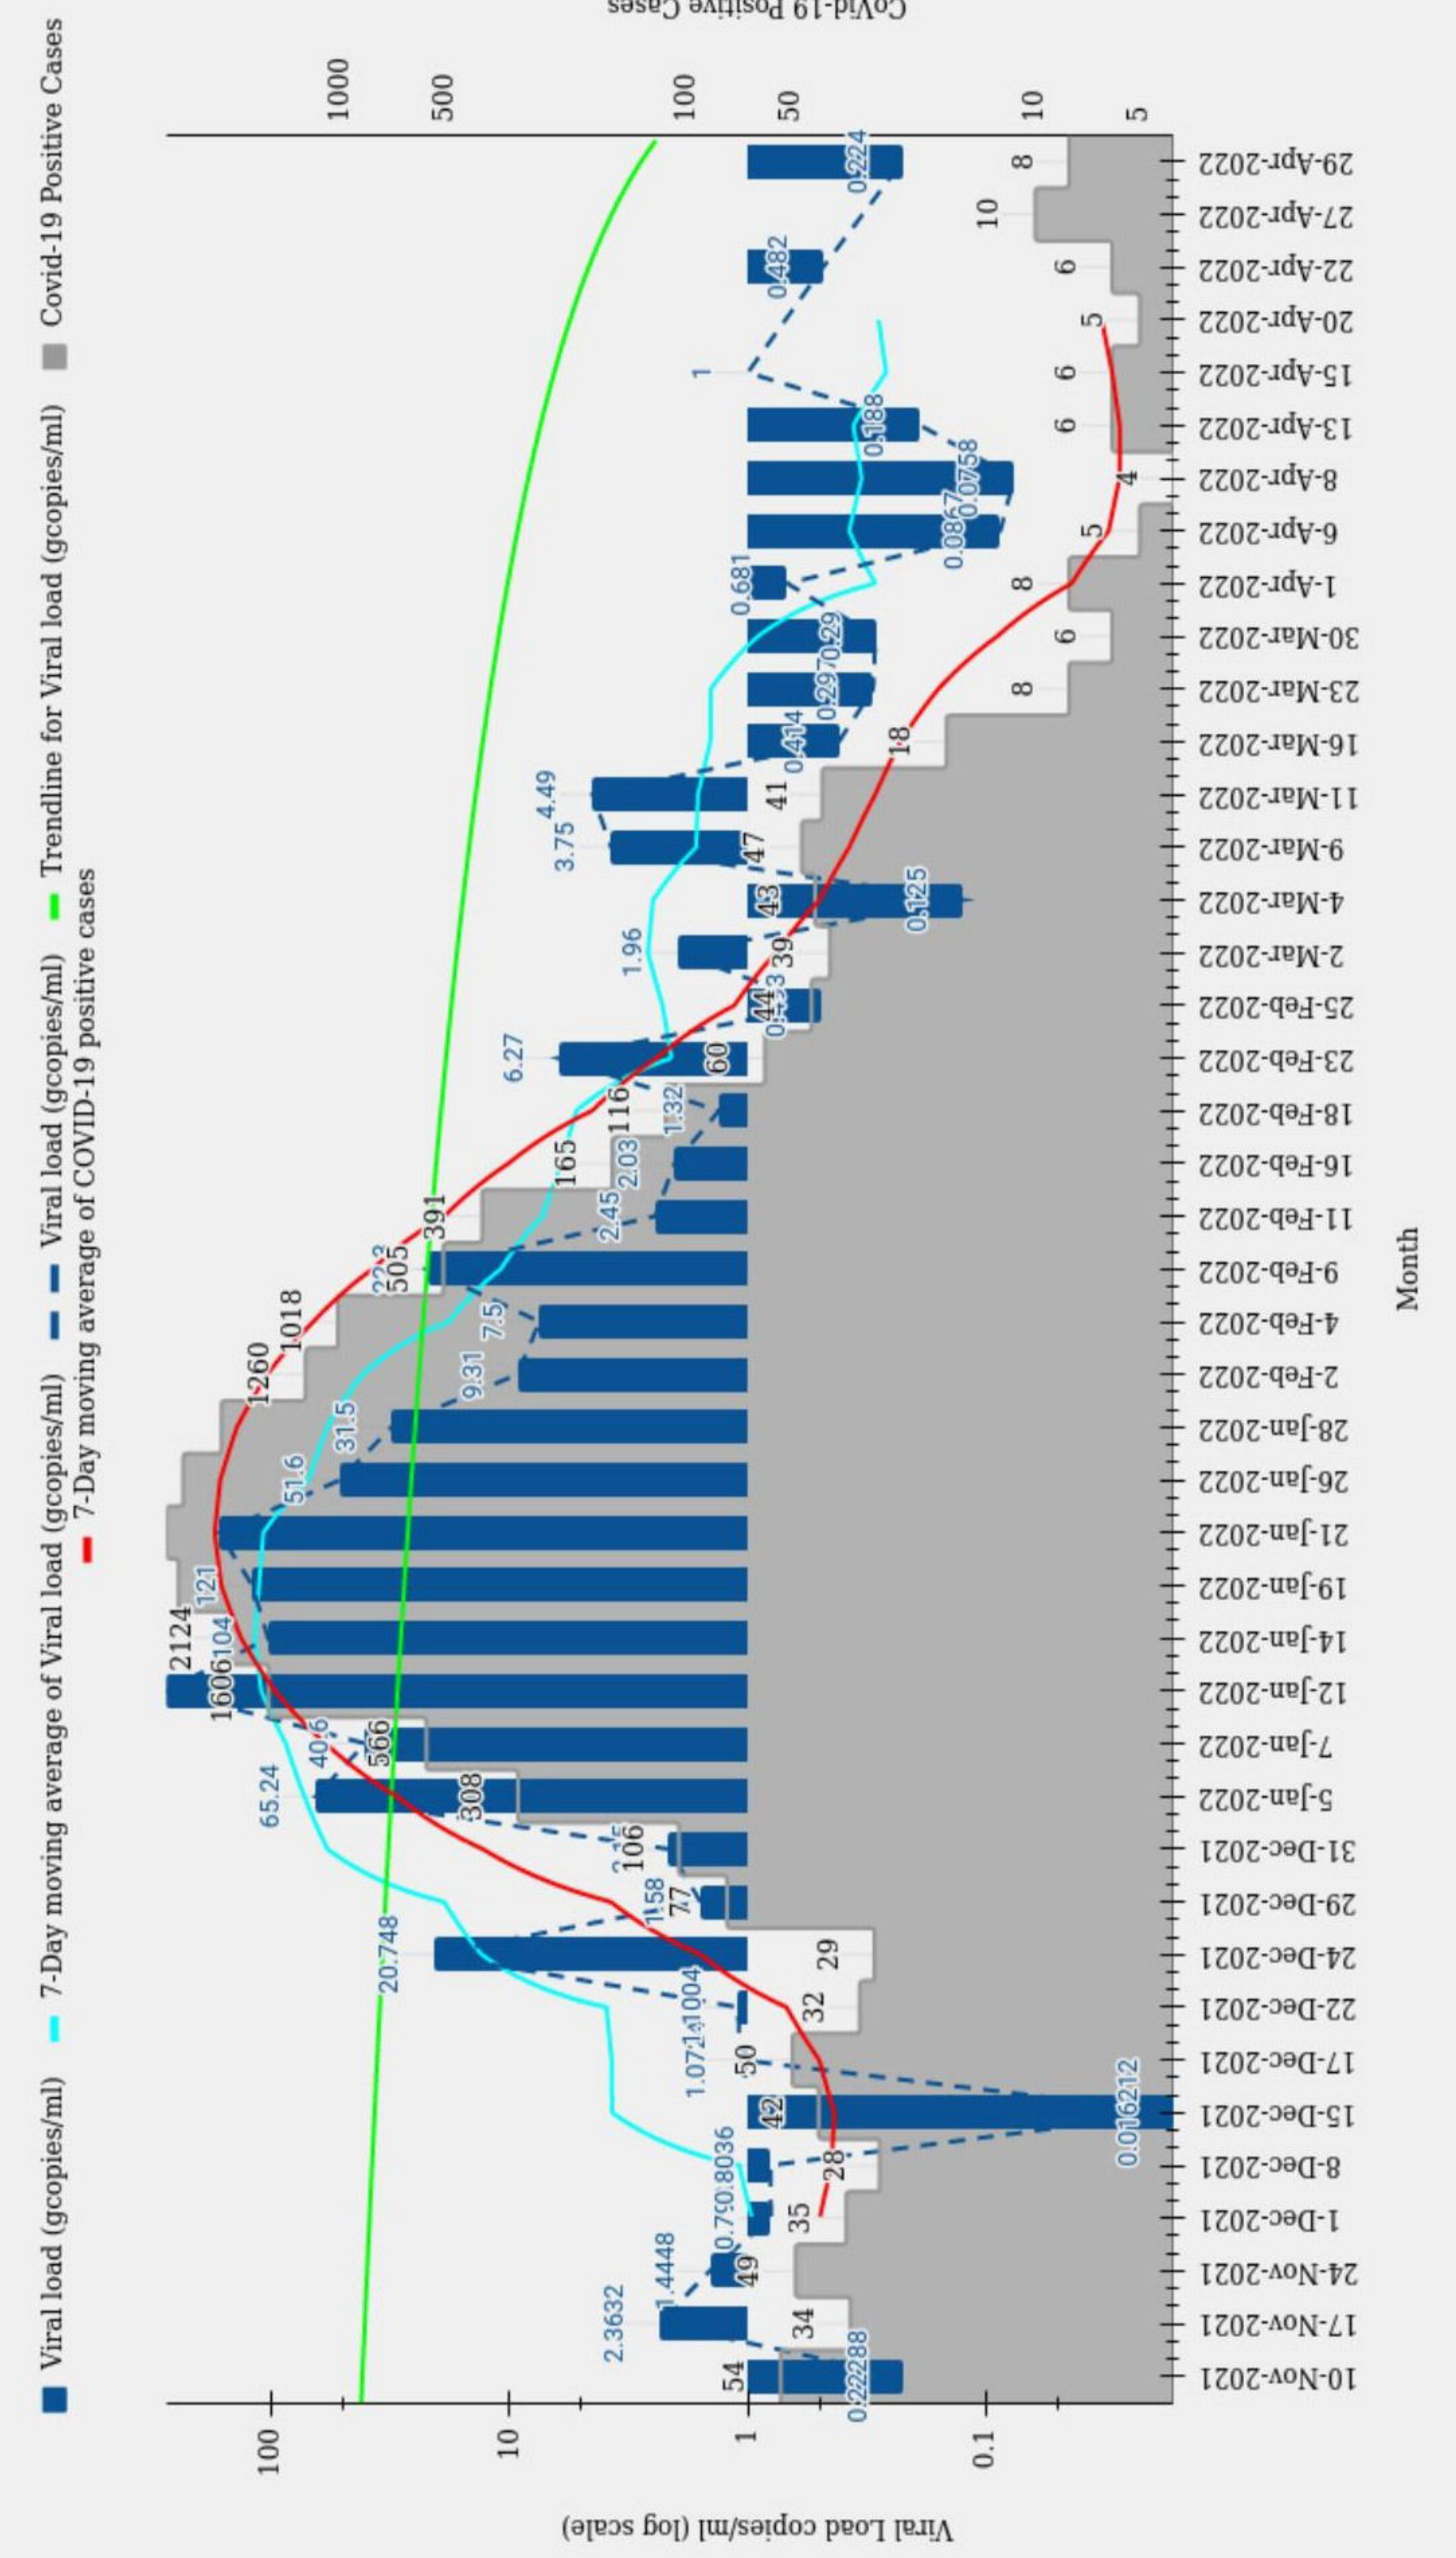

STP : Old Naidu

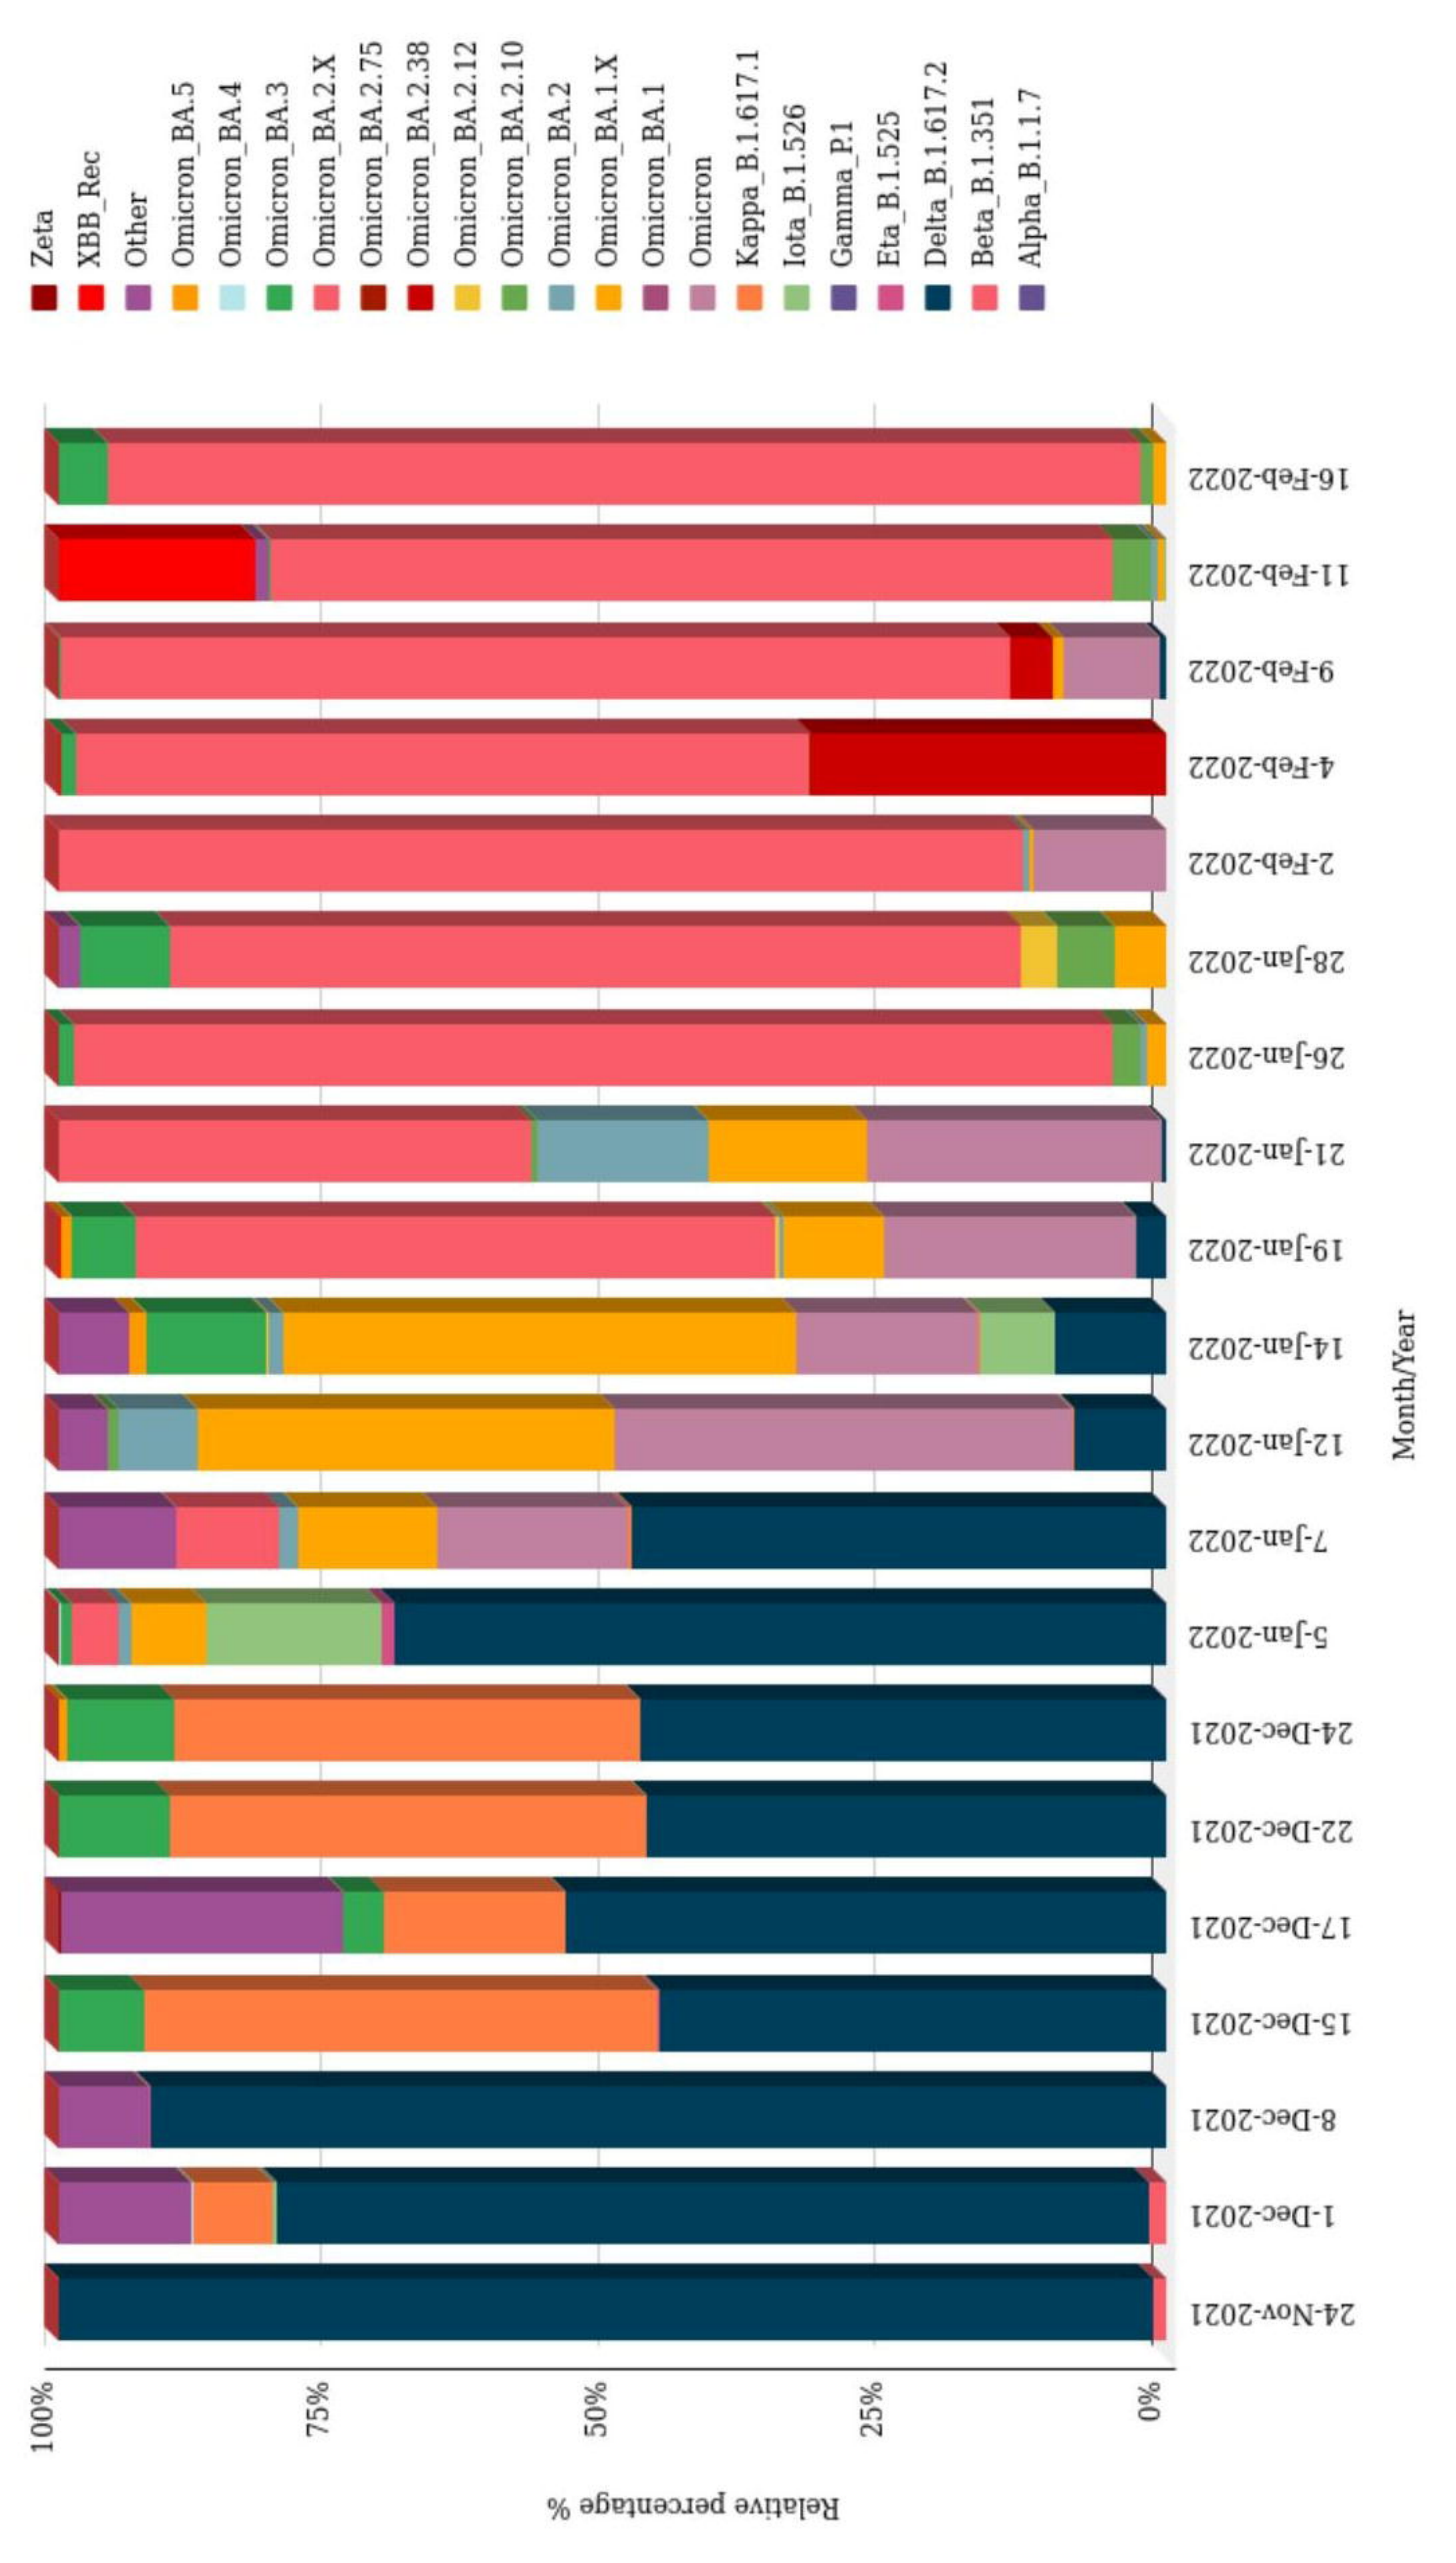

STP : Tanajiwadi

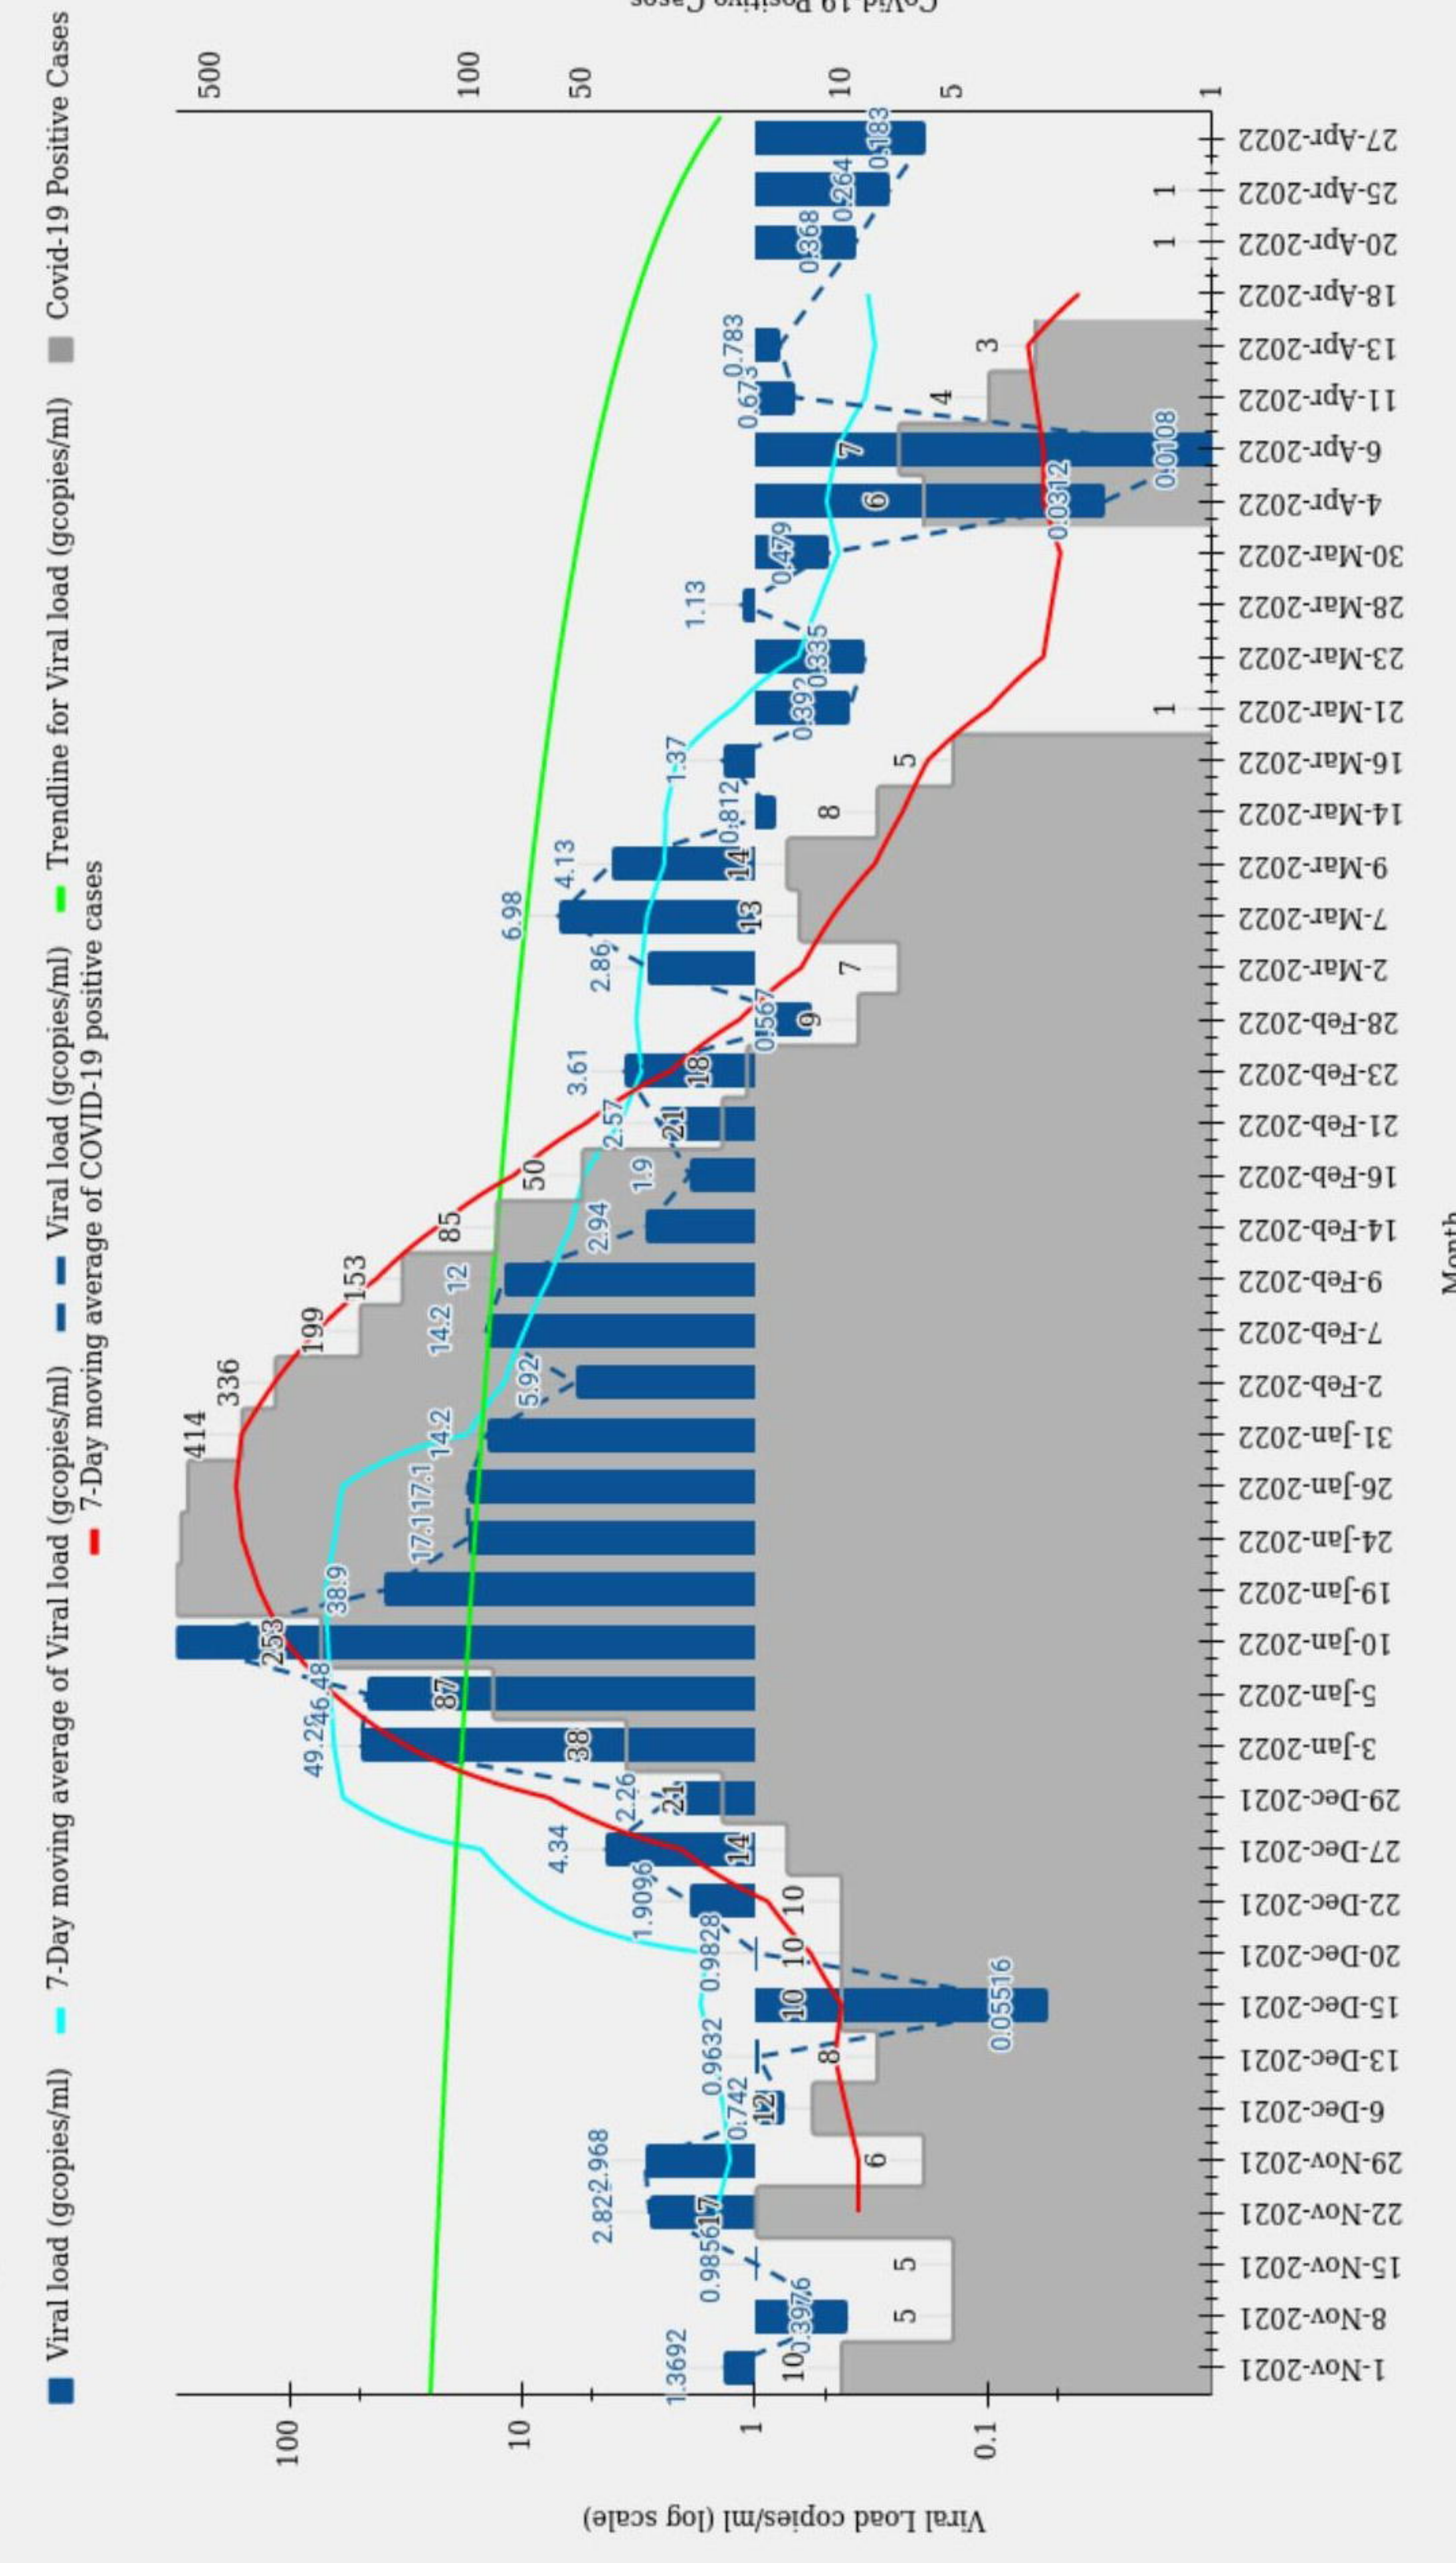

STP : Tanajiwadi

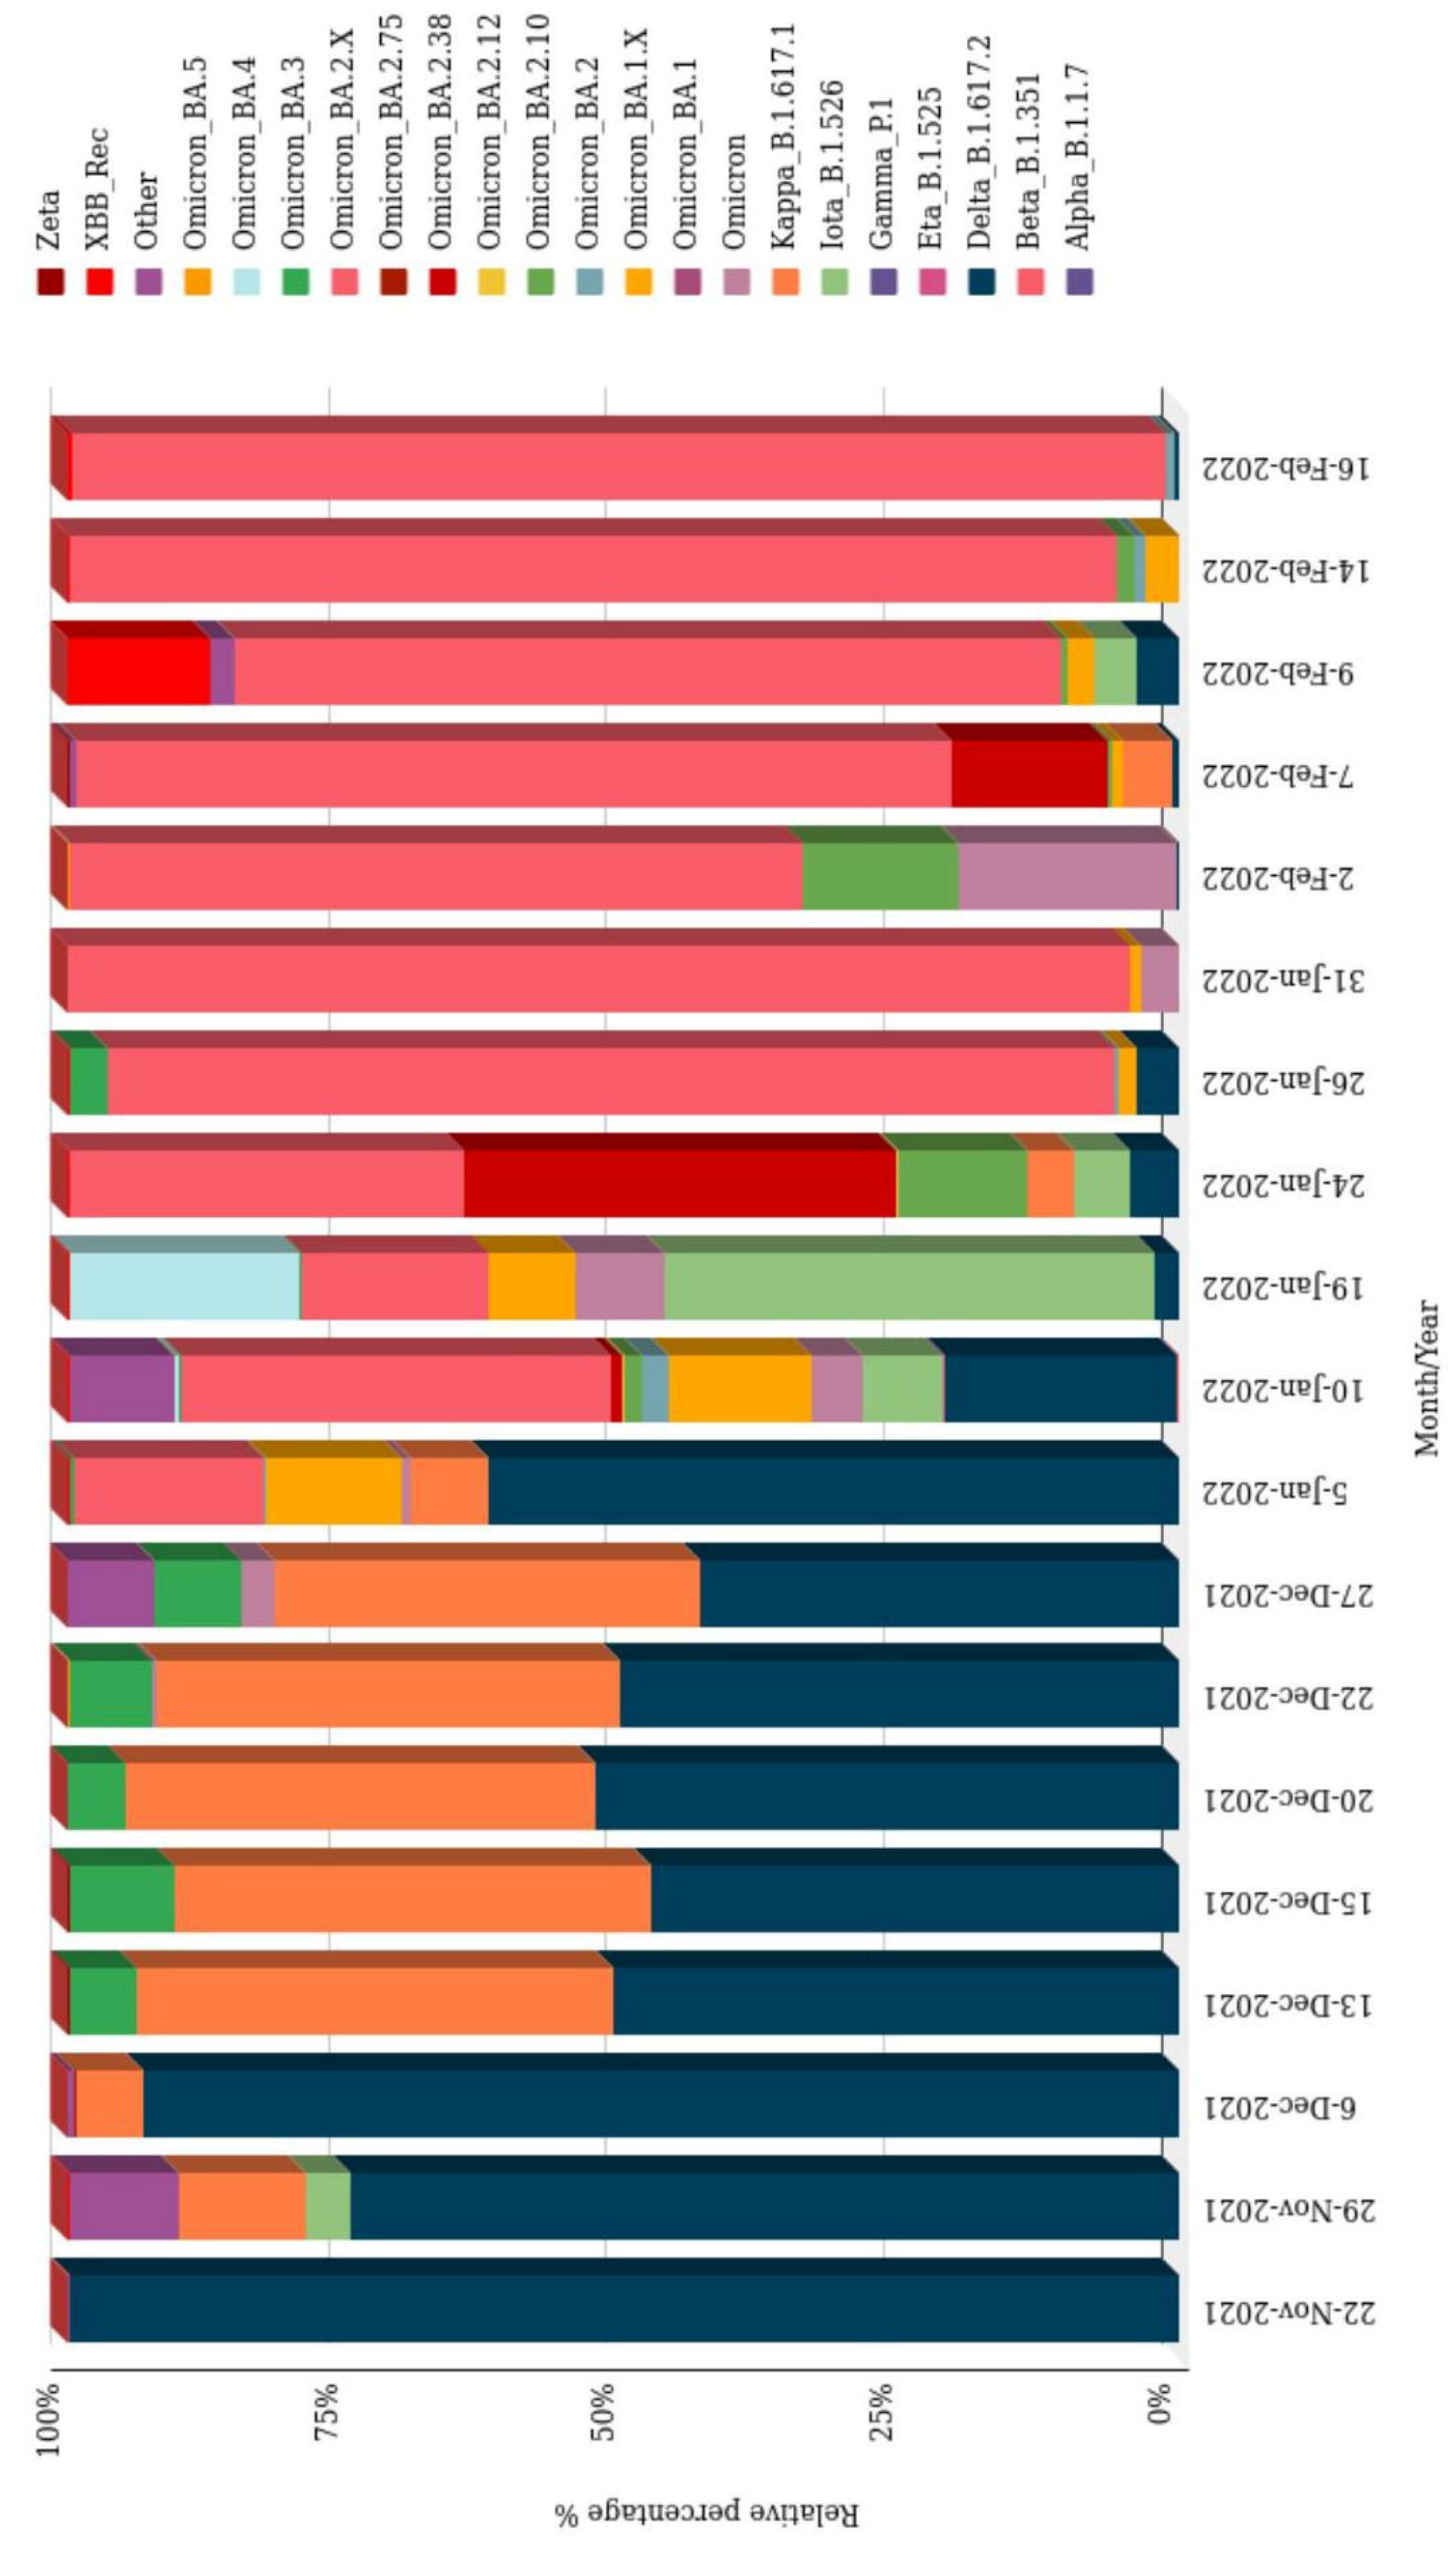

STP : Vitthalwadi

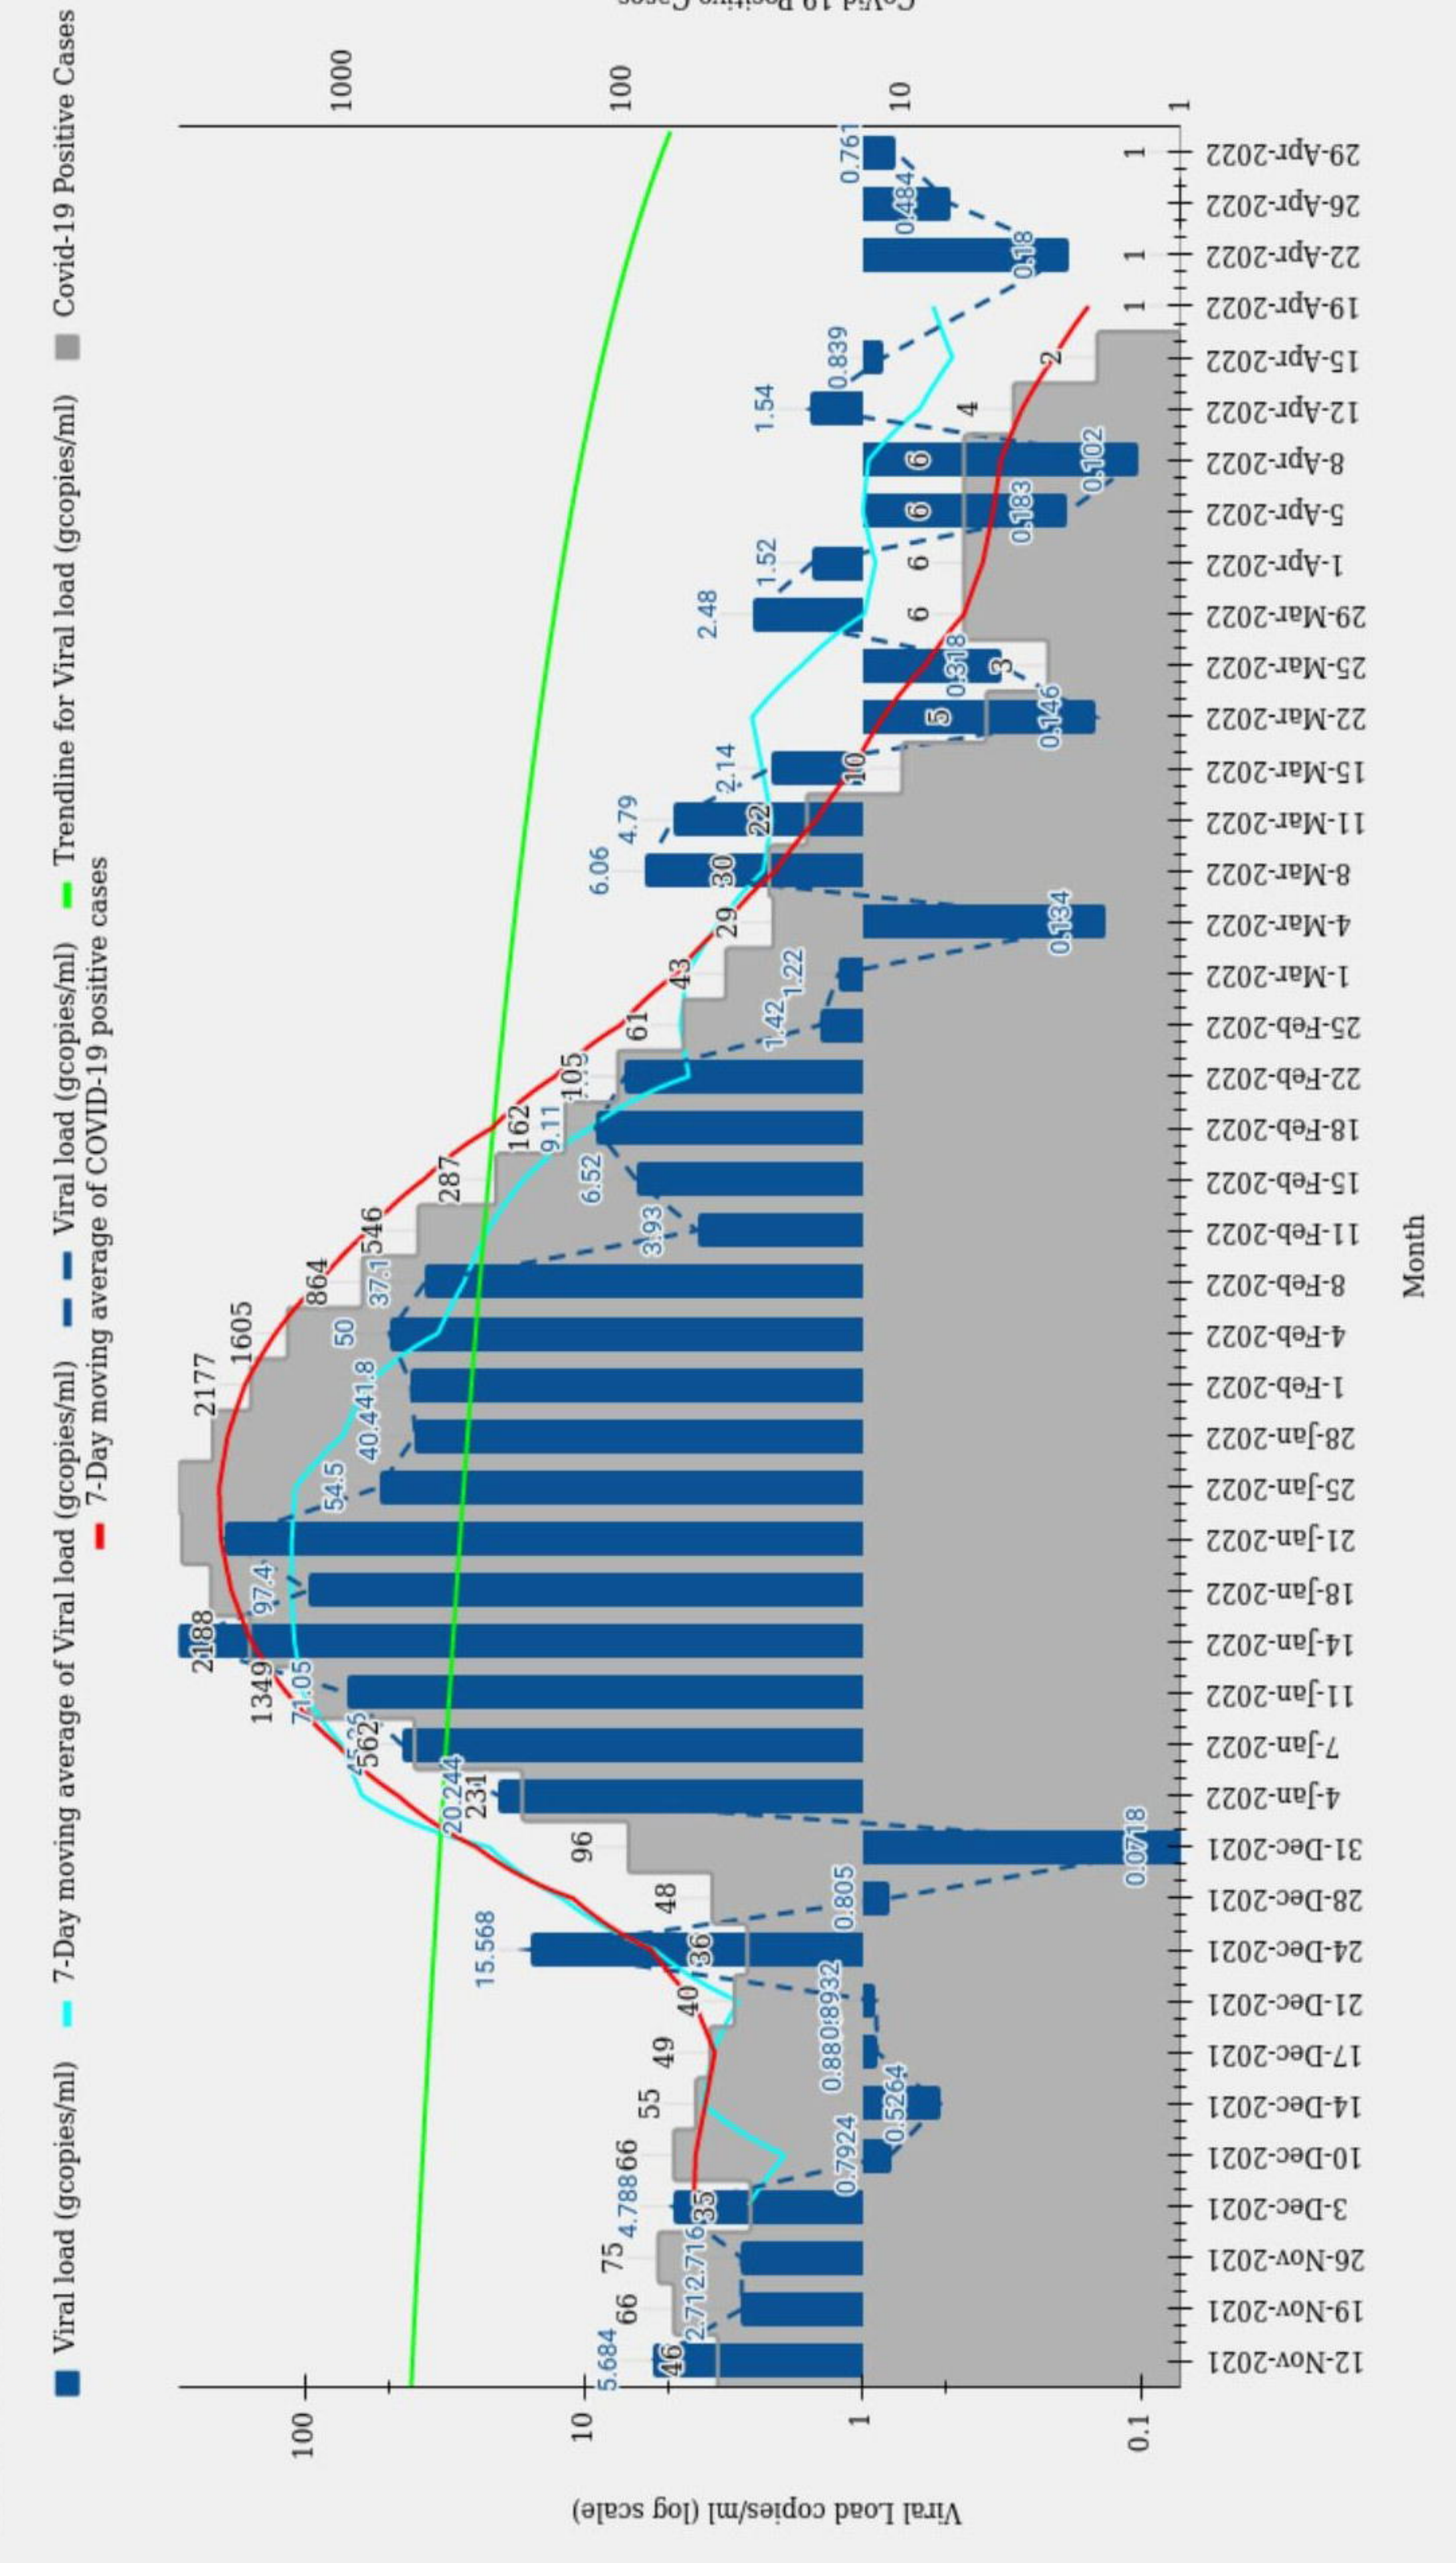

STP : Vitthalwadi

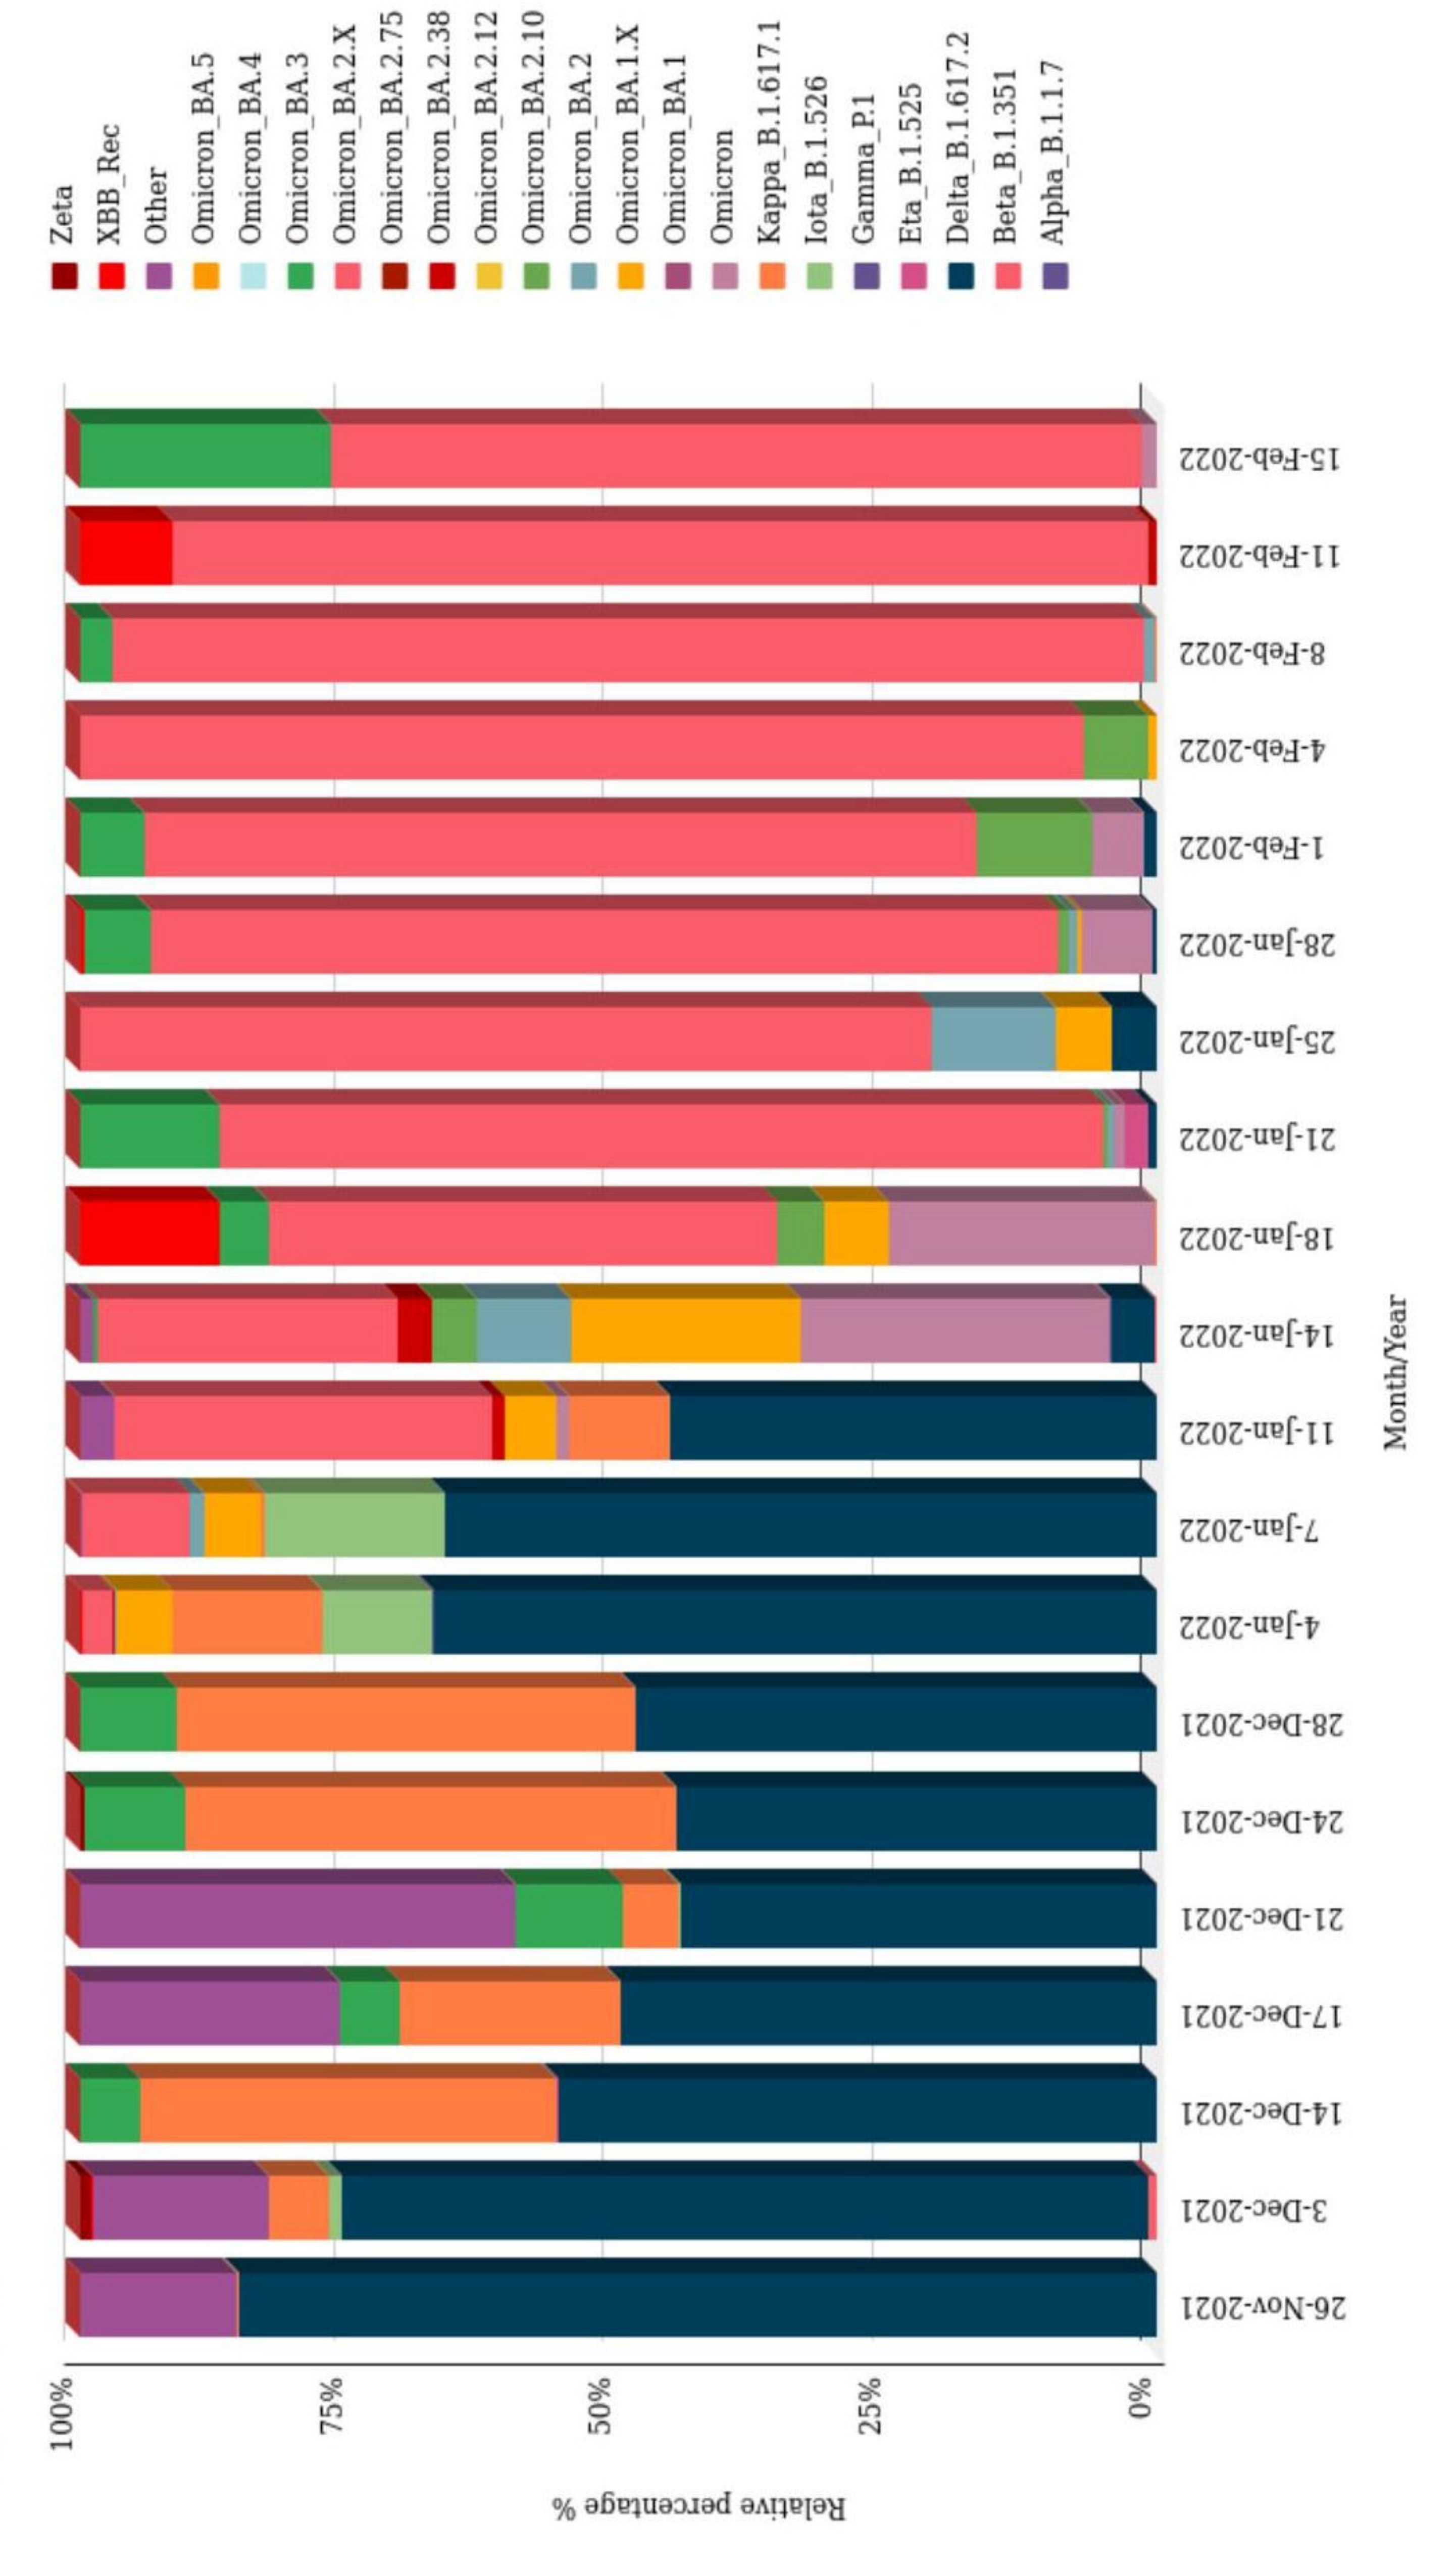

STP : Mundhwa

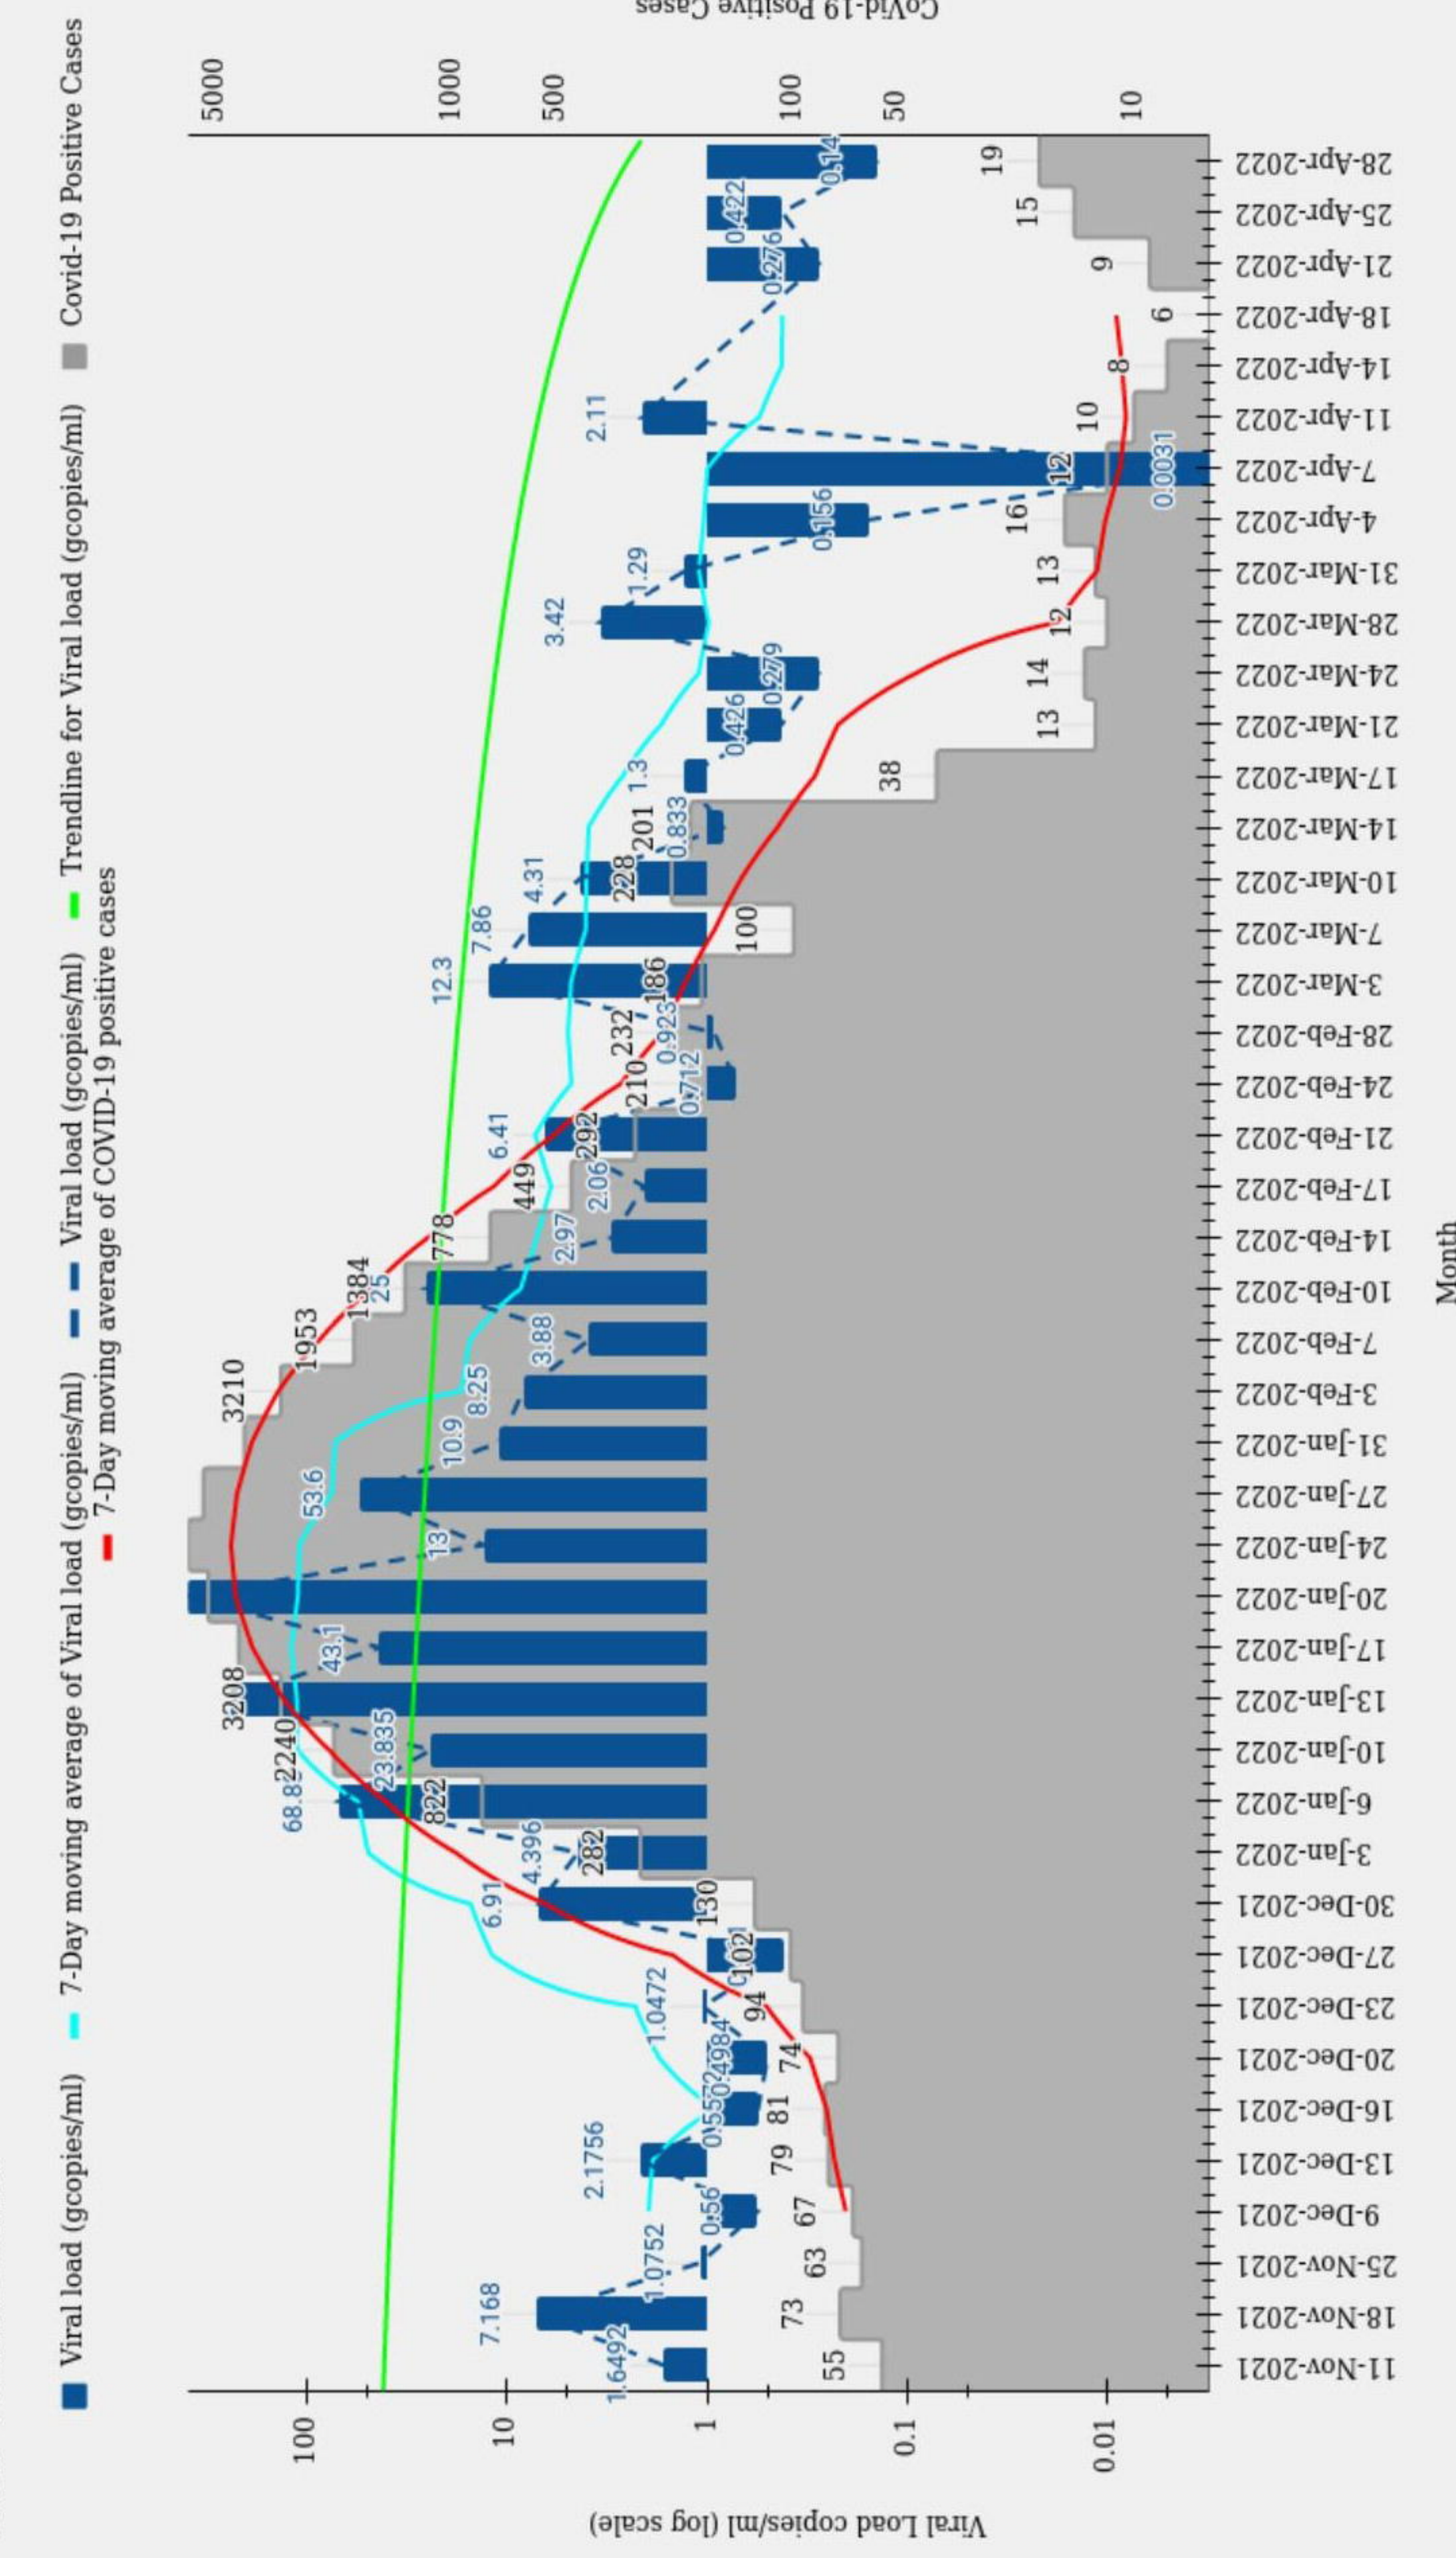

STP : Mundhwa

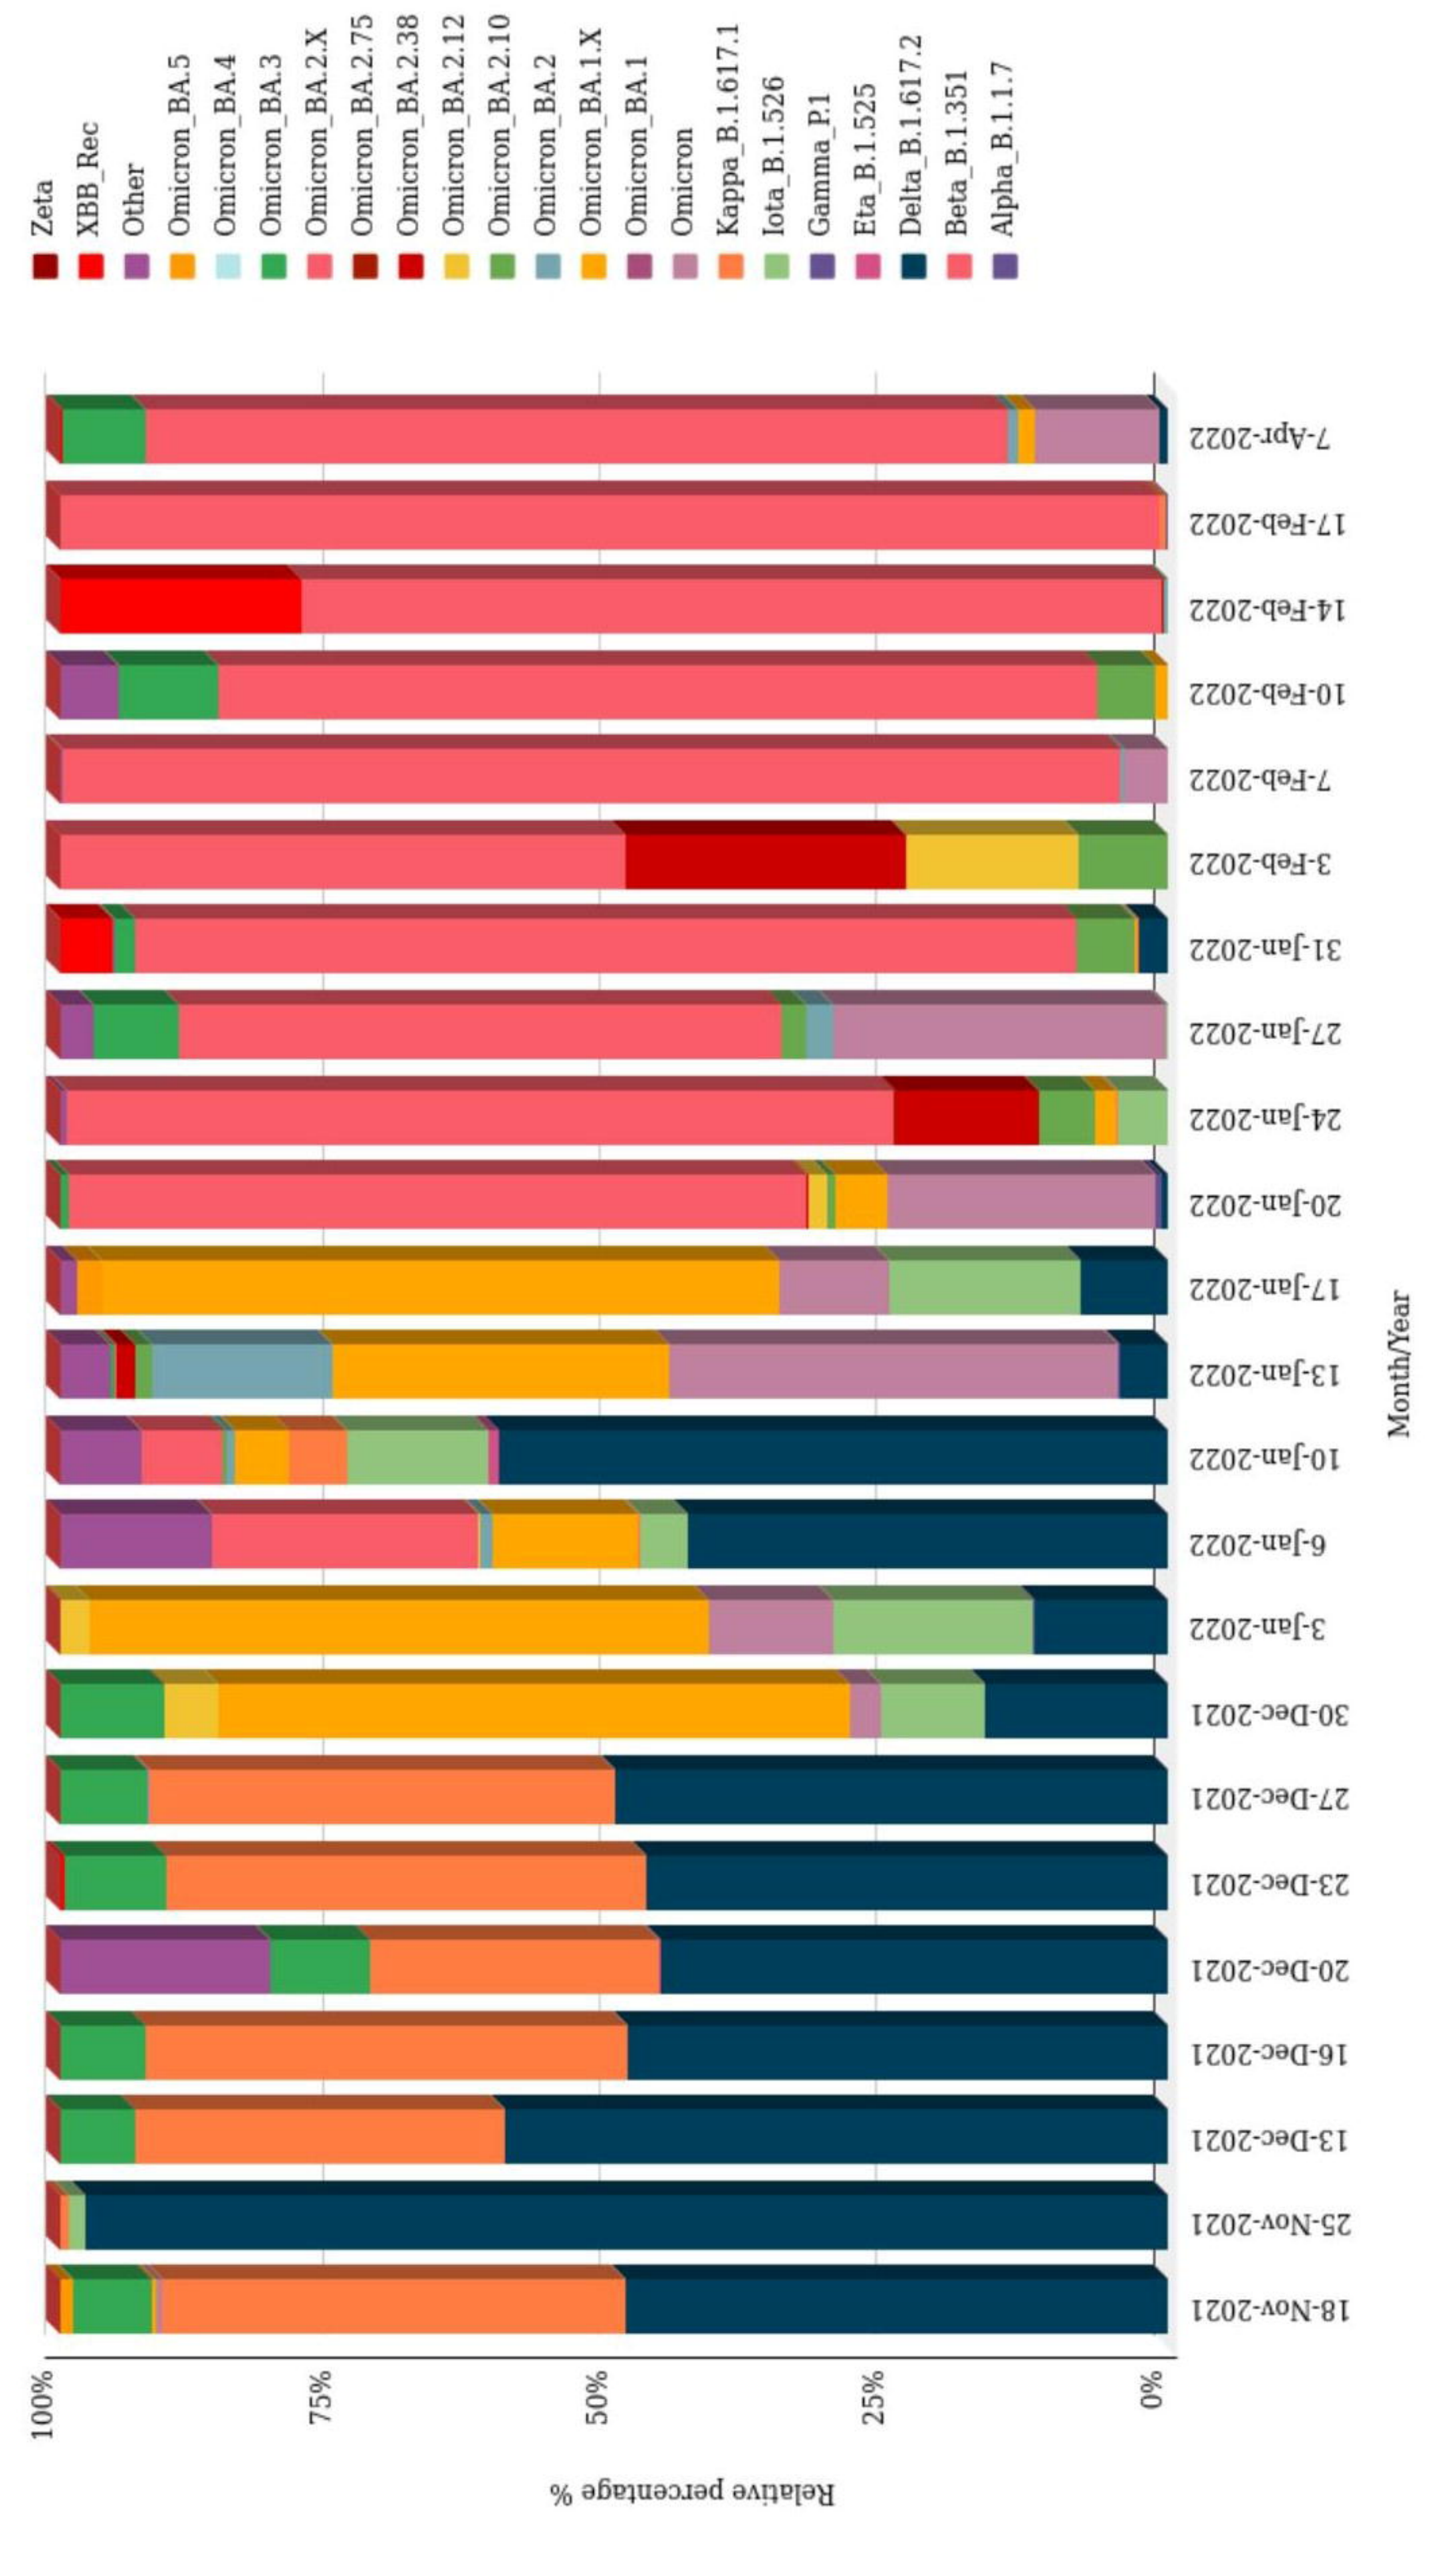

**STP : Baner**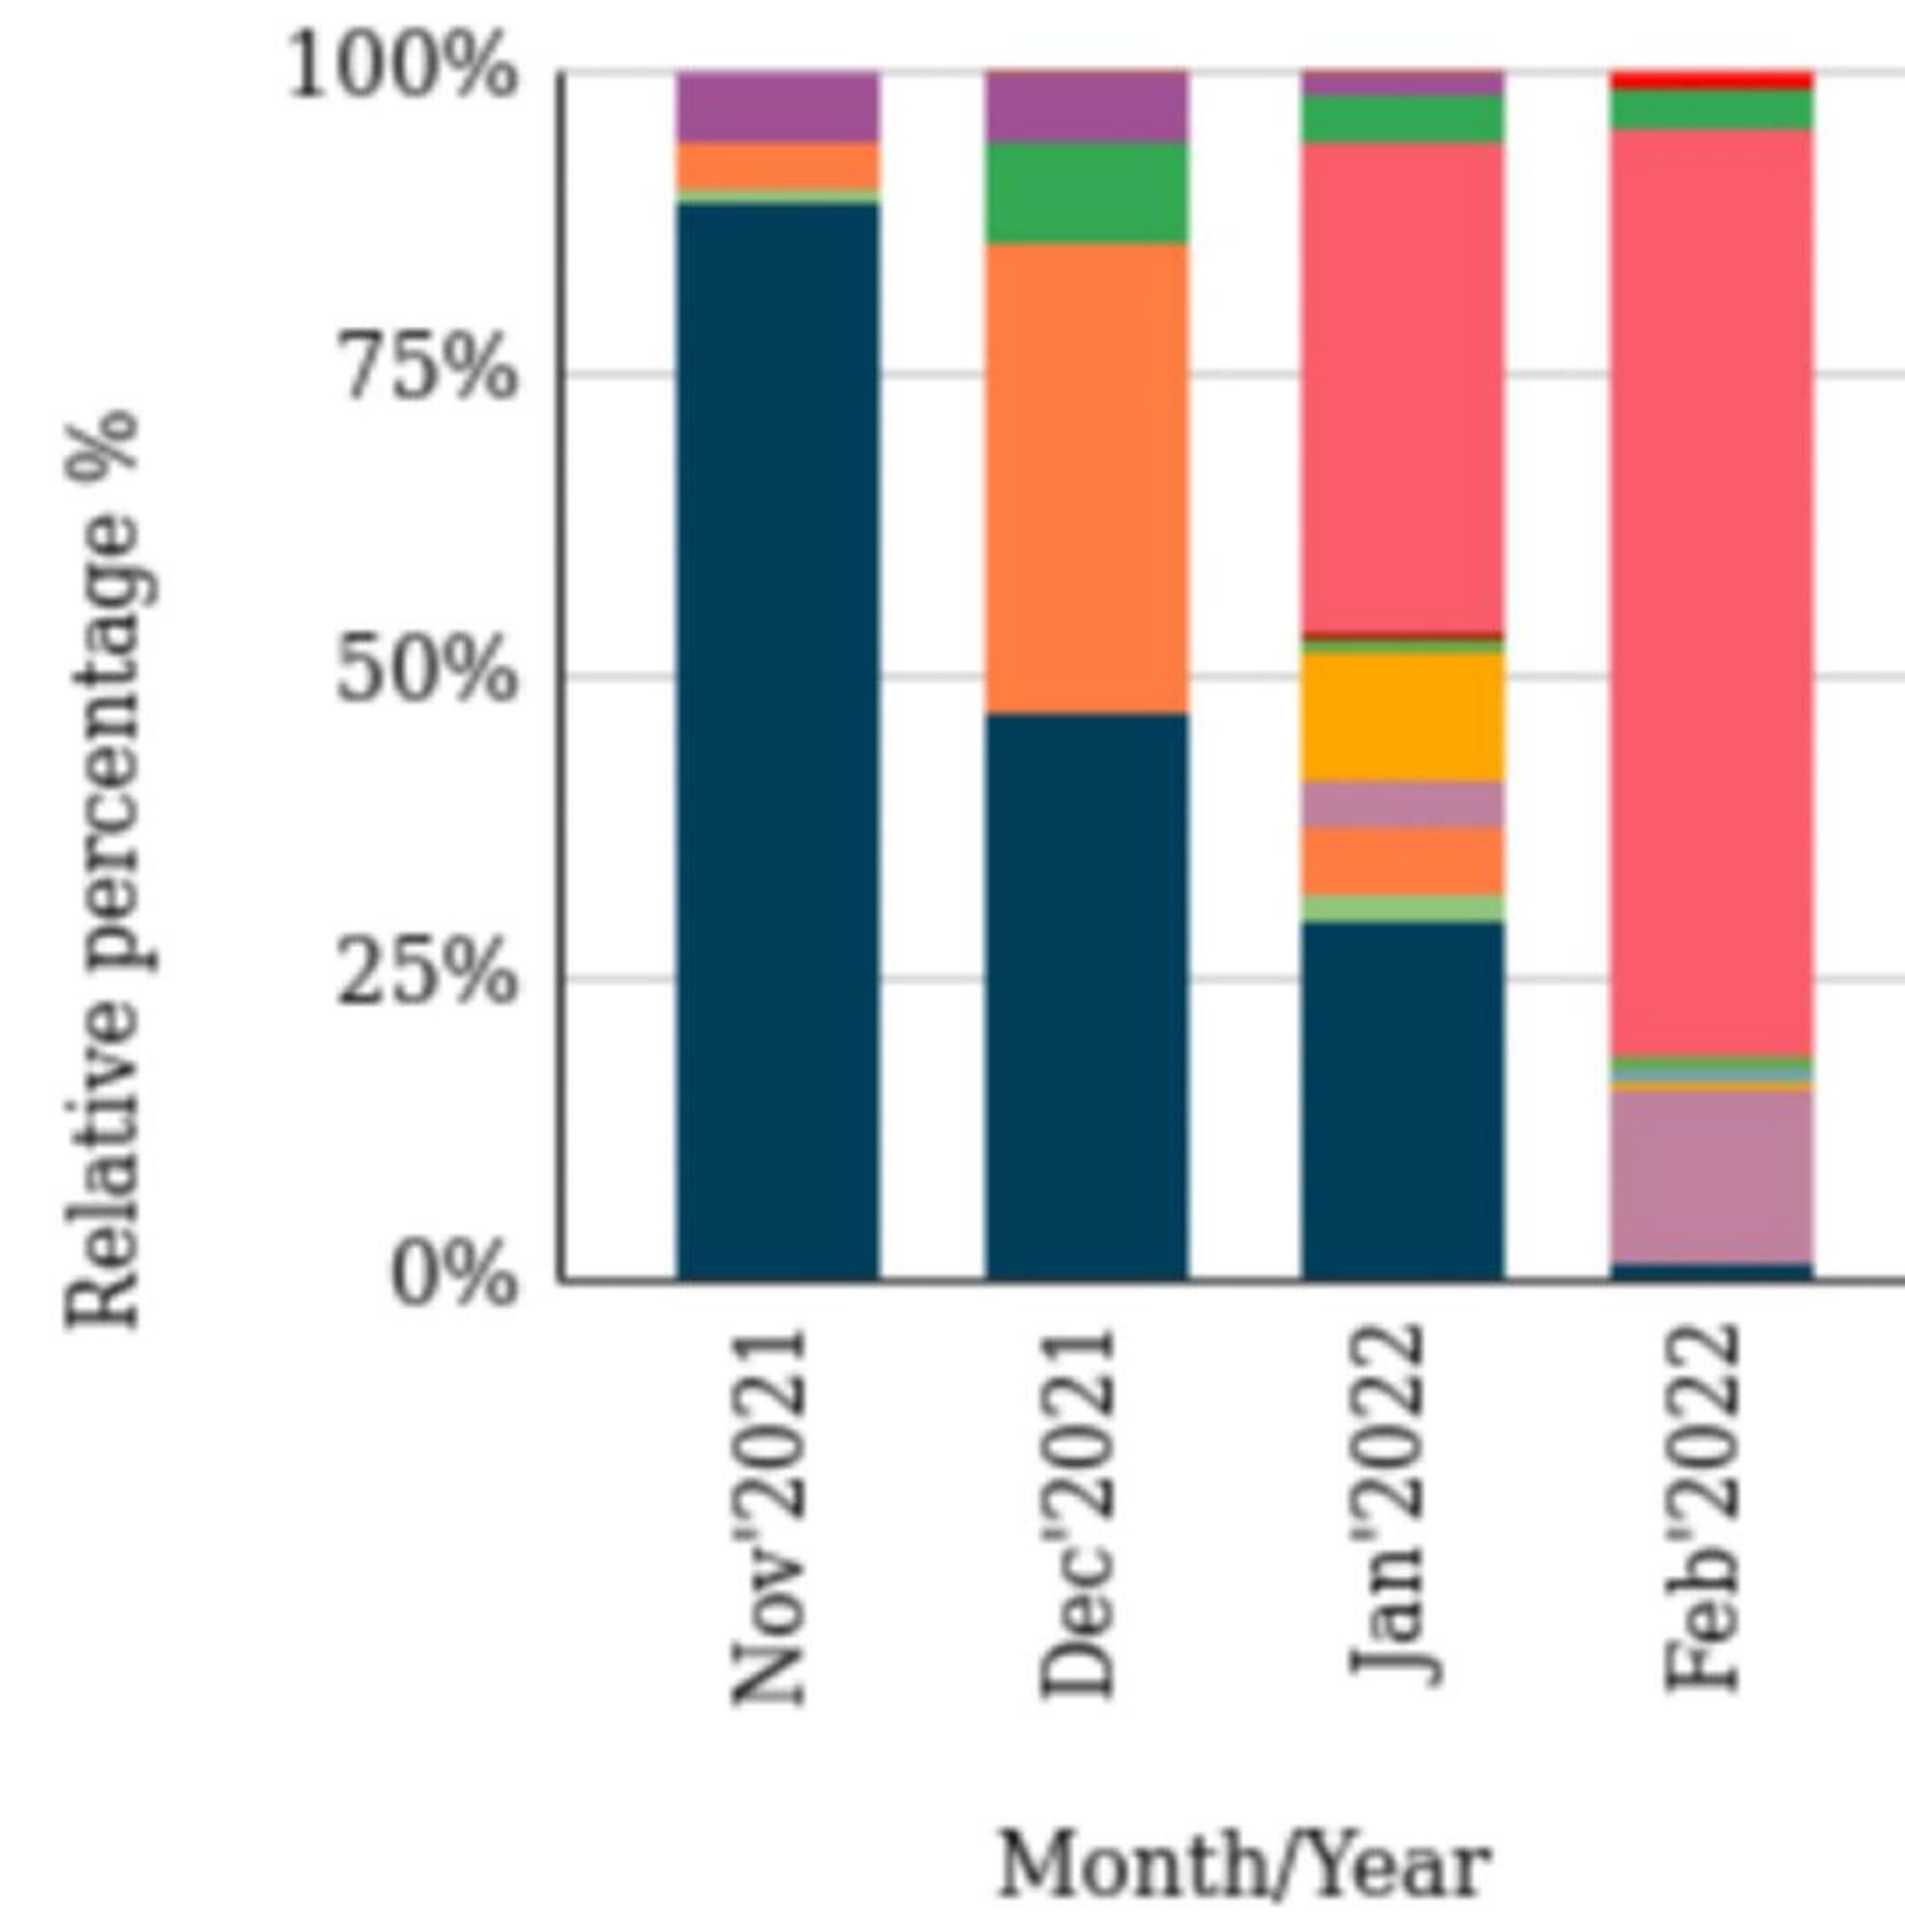**STP : Kharadi**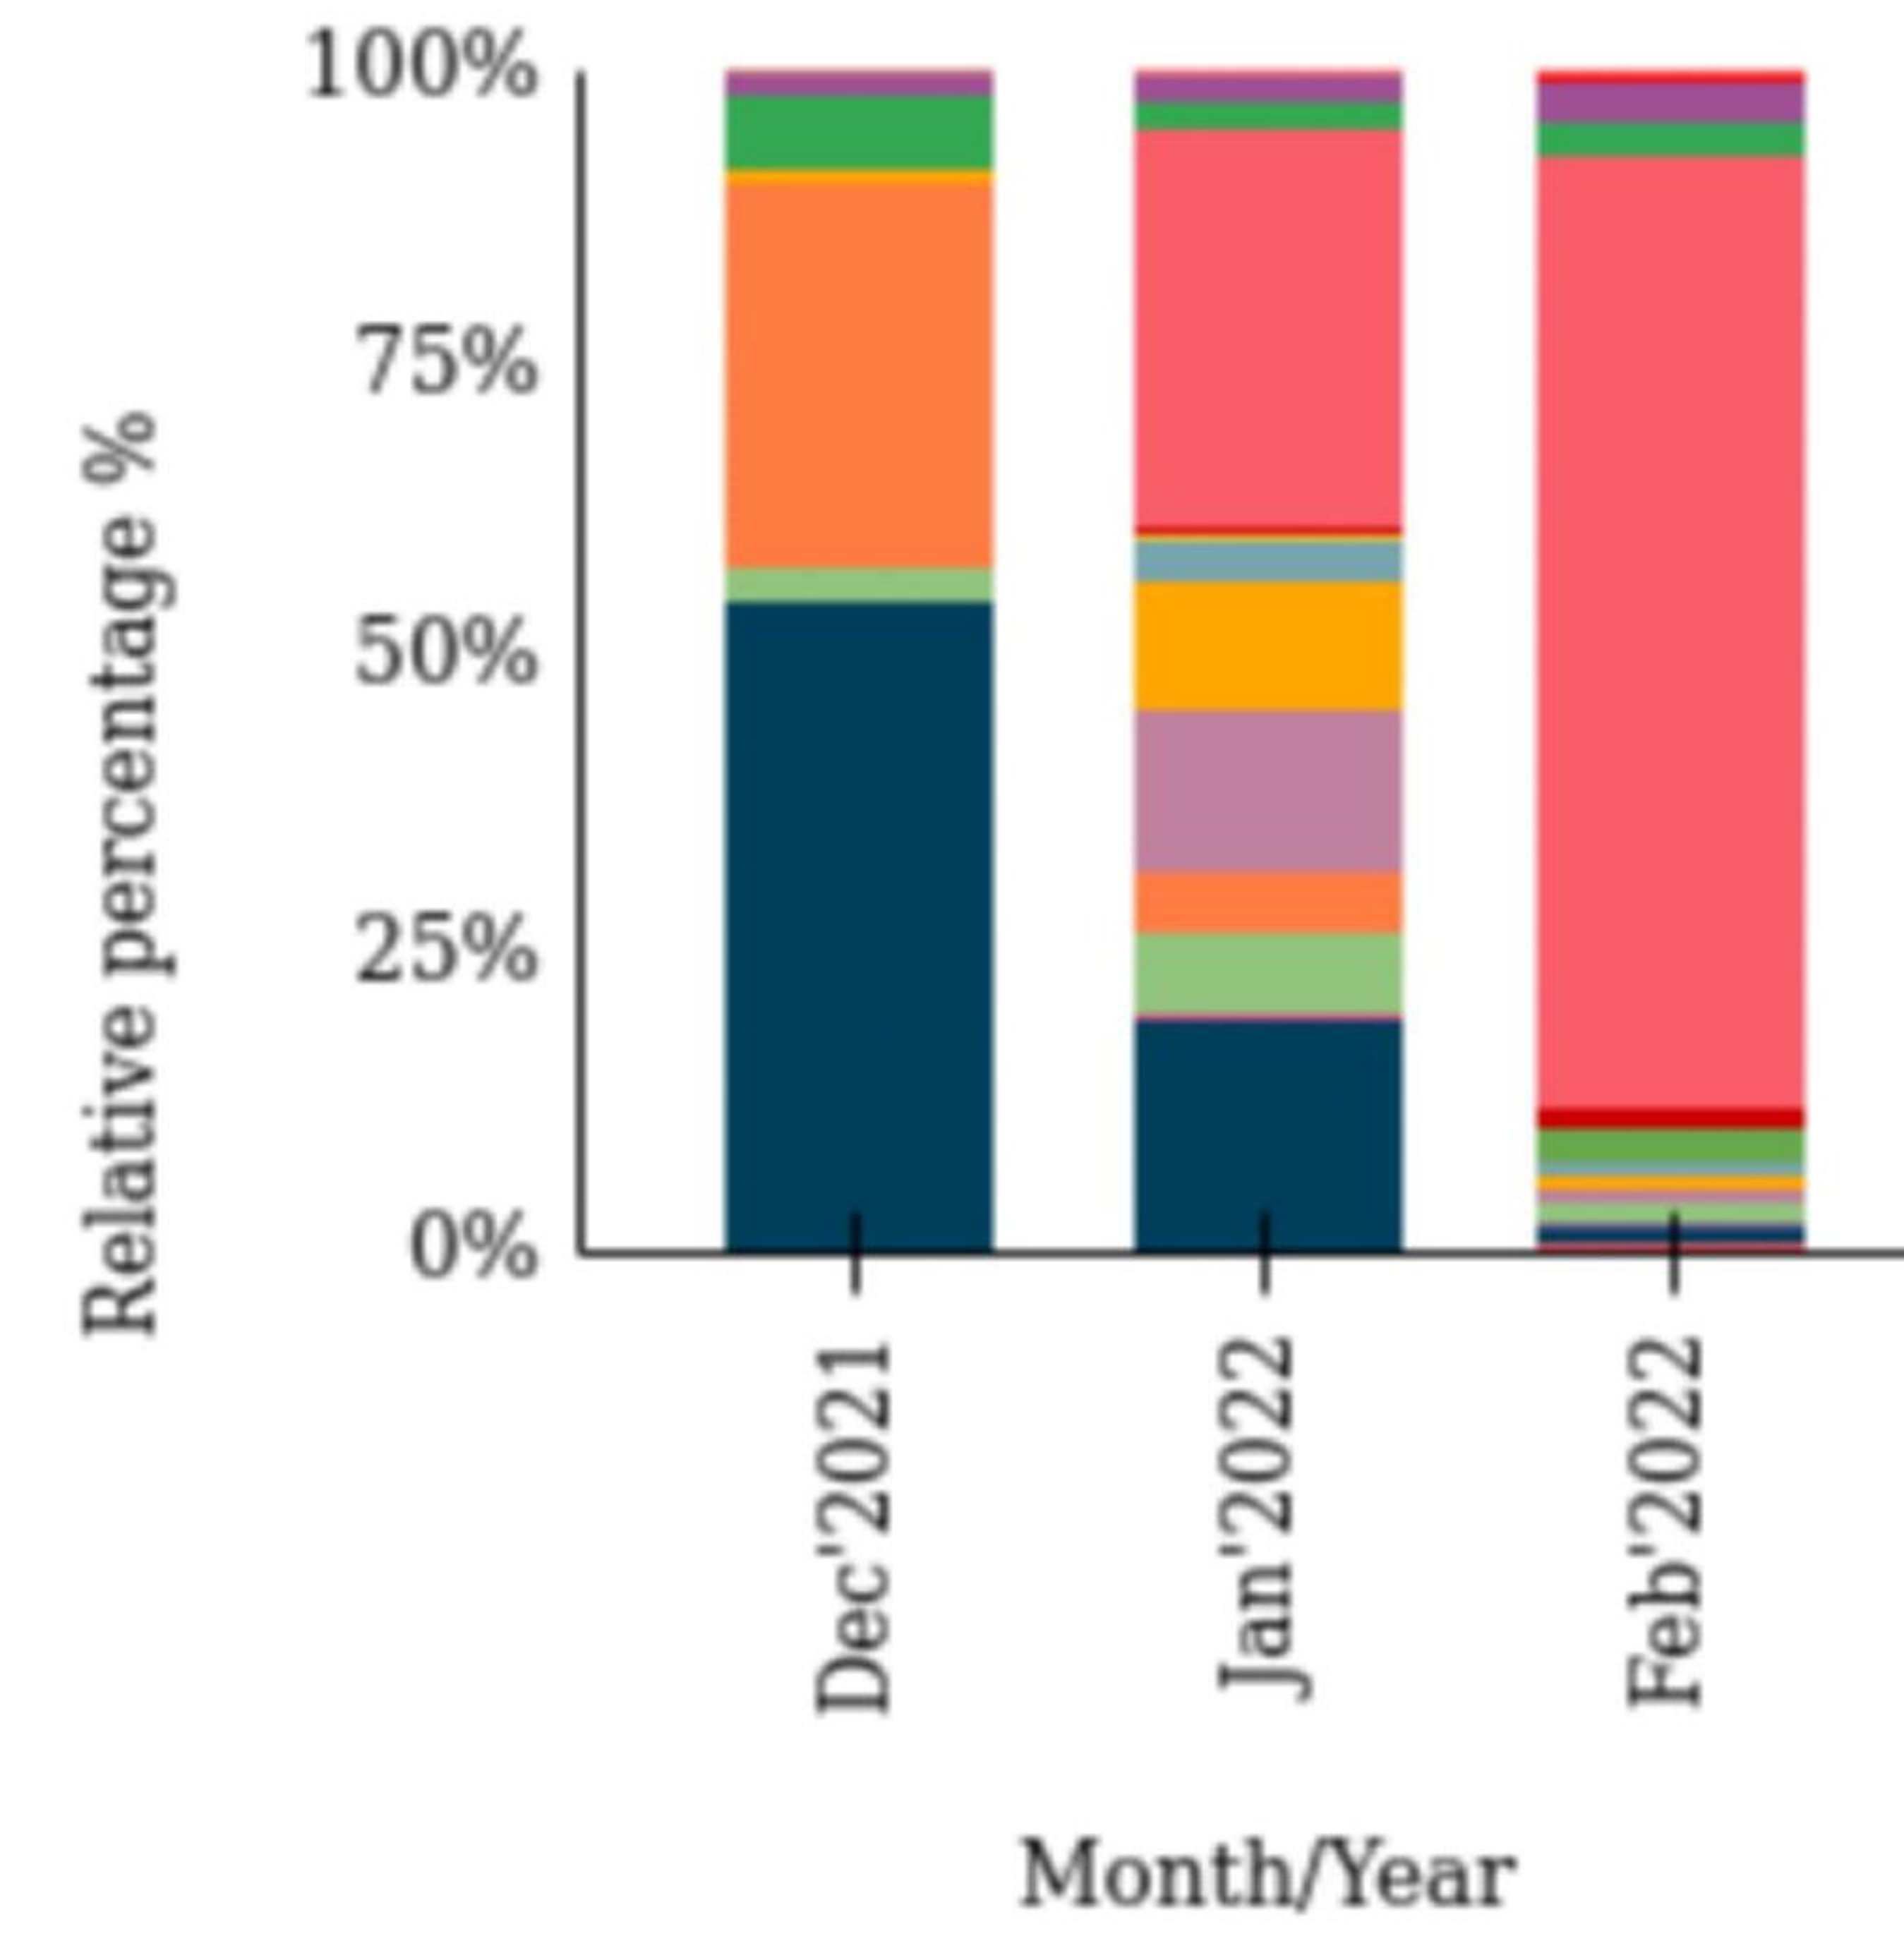**STP : Bopodi**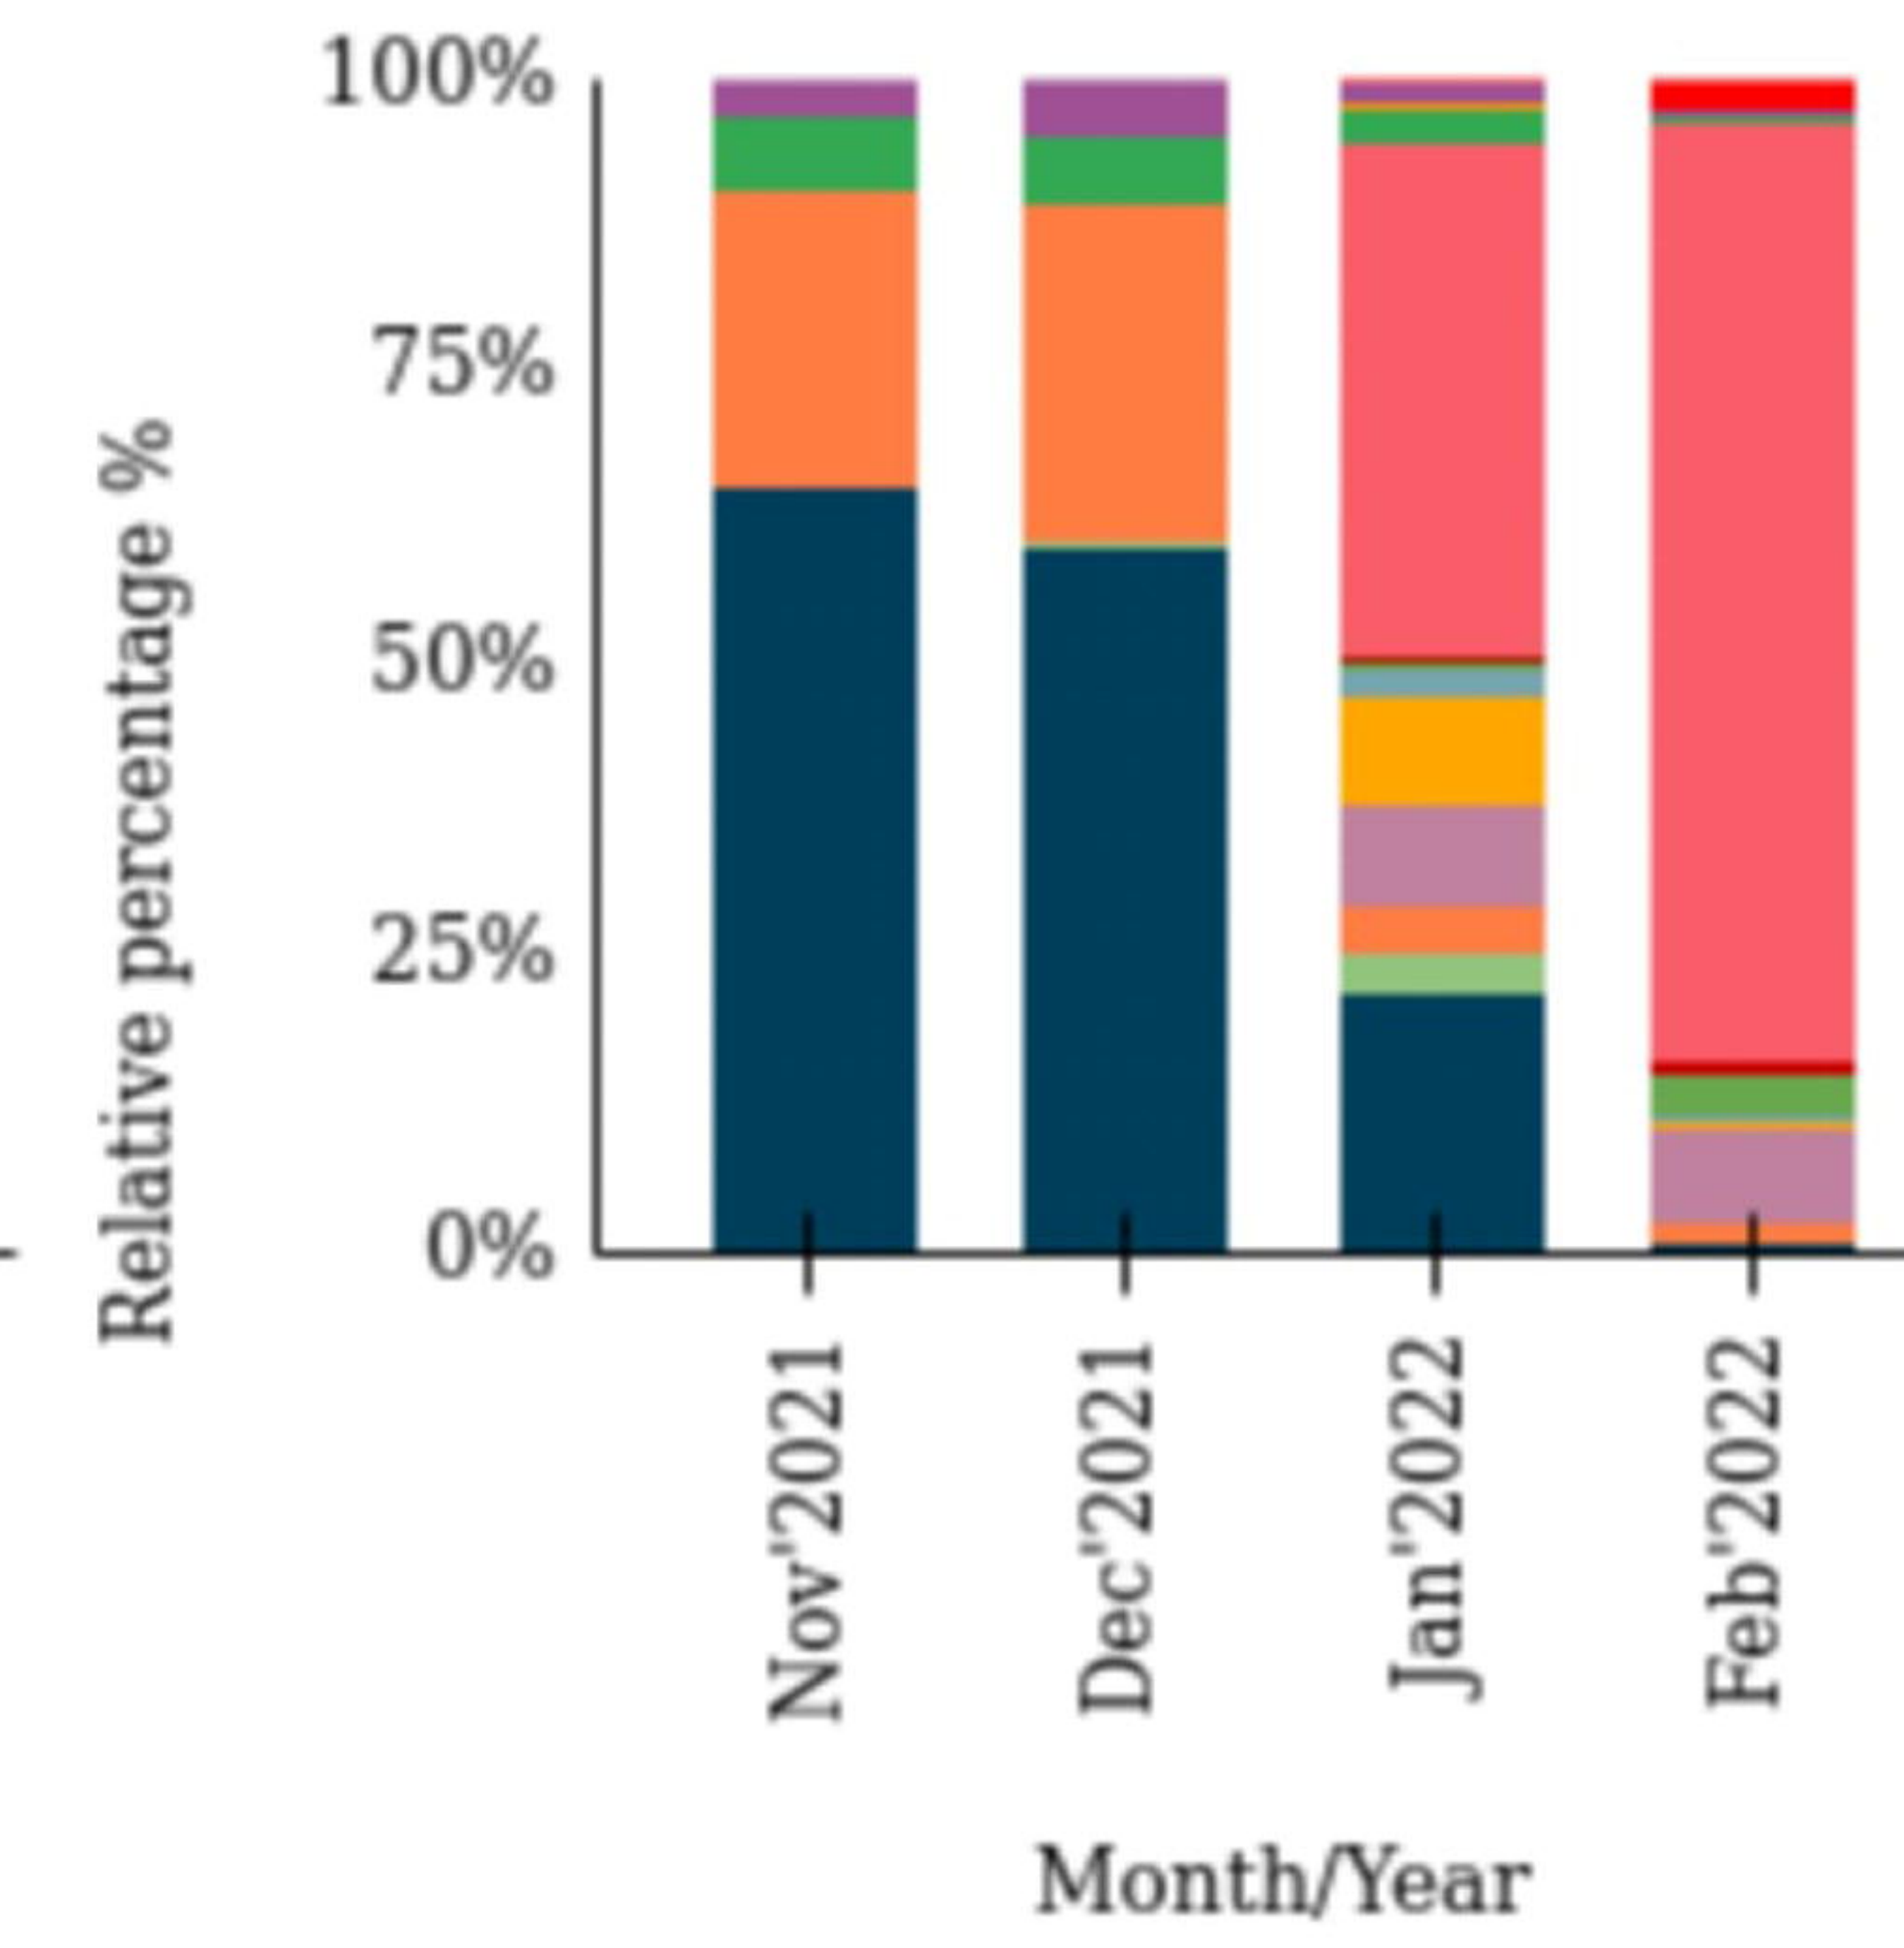**STP : Erandwane**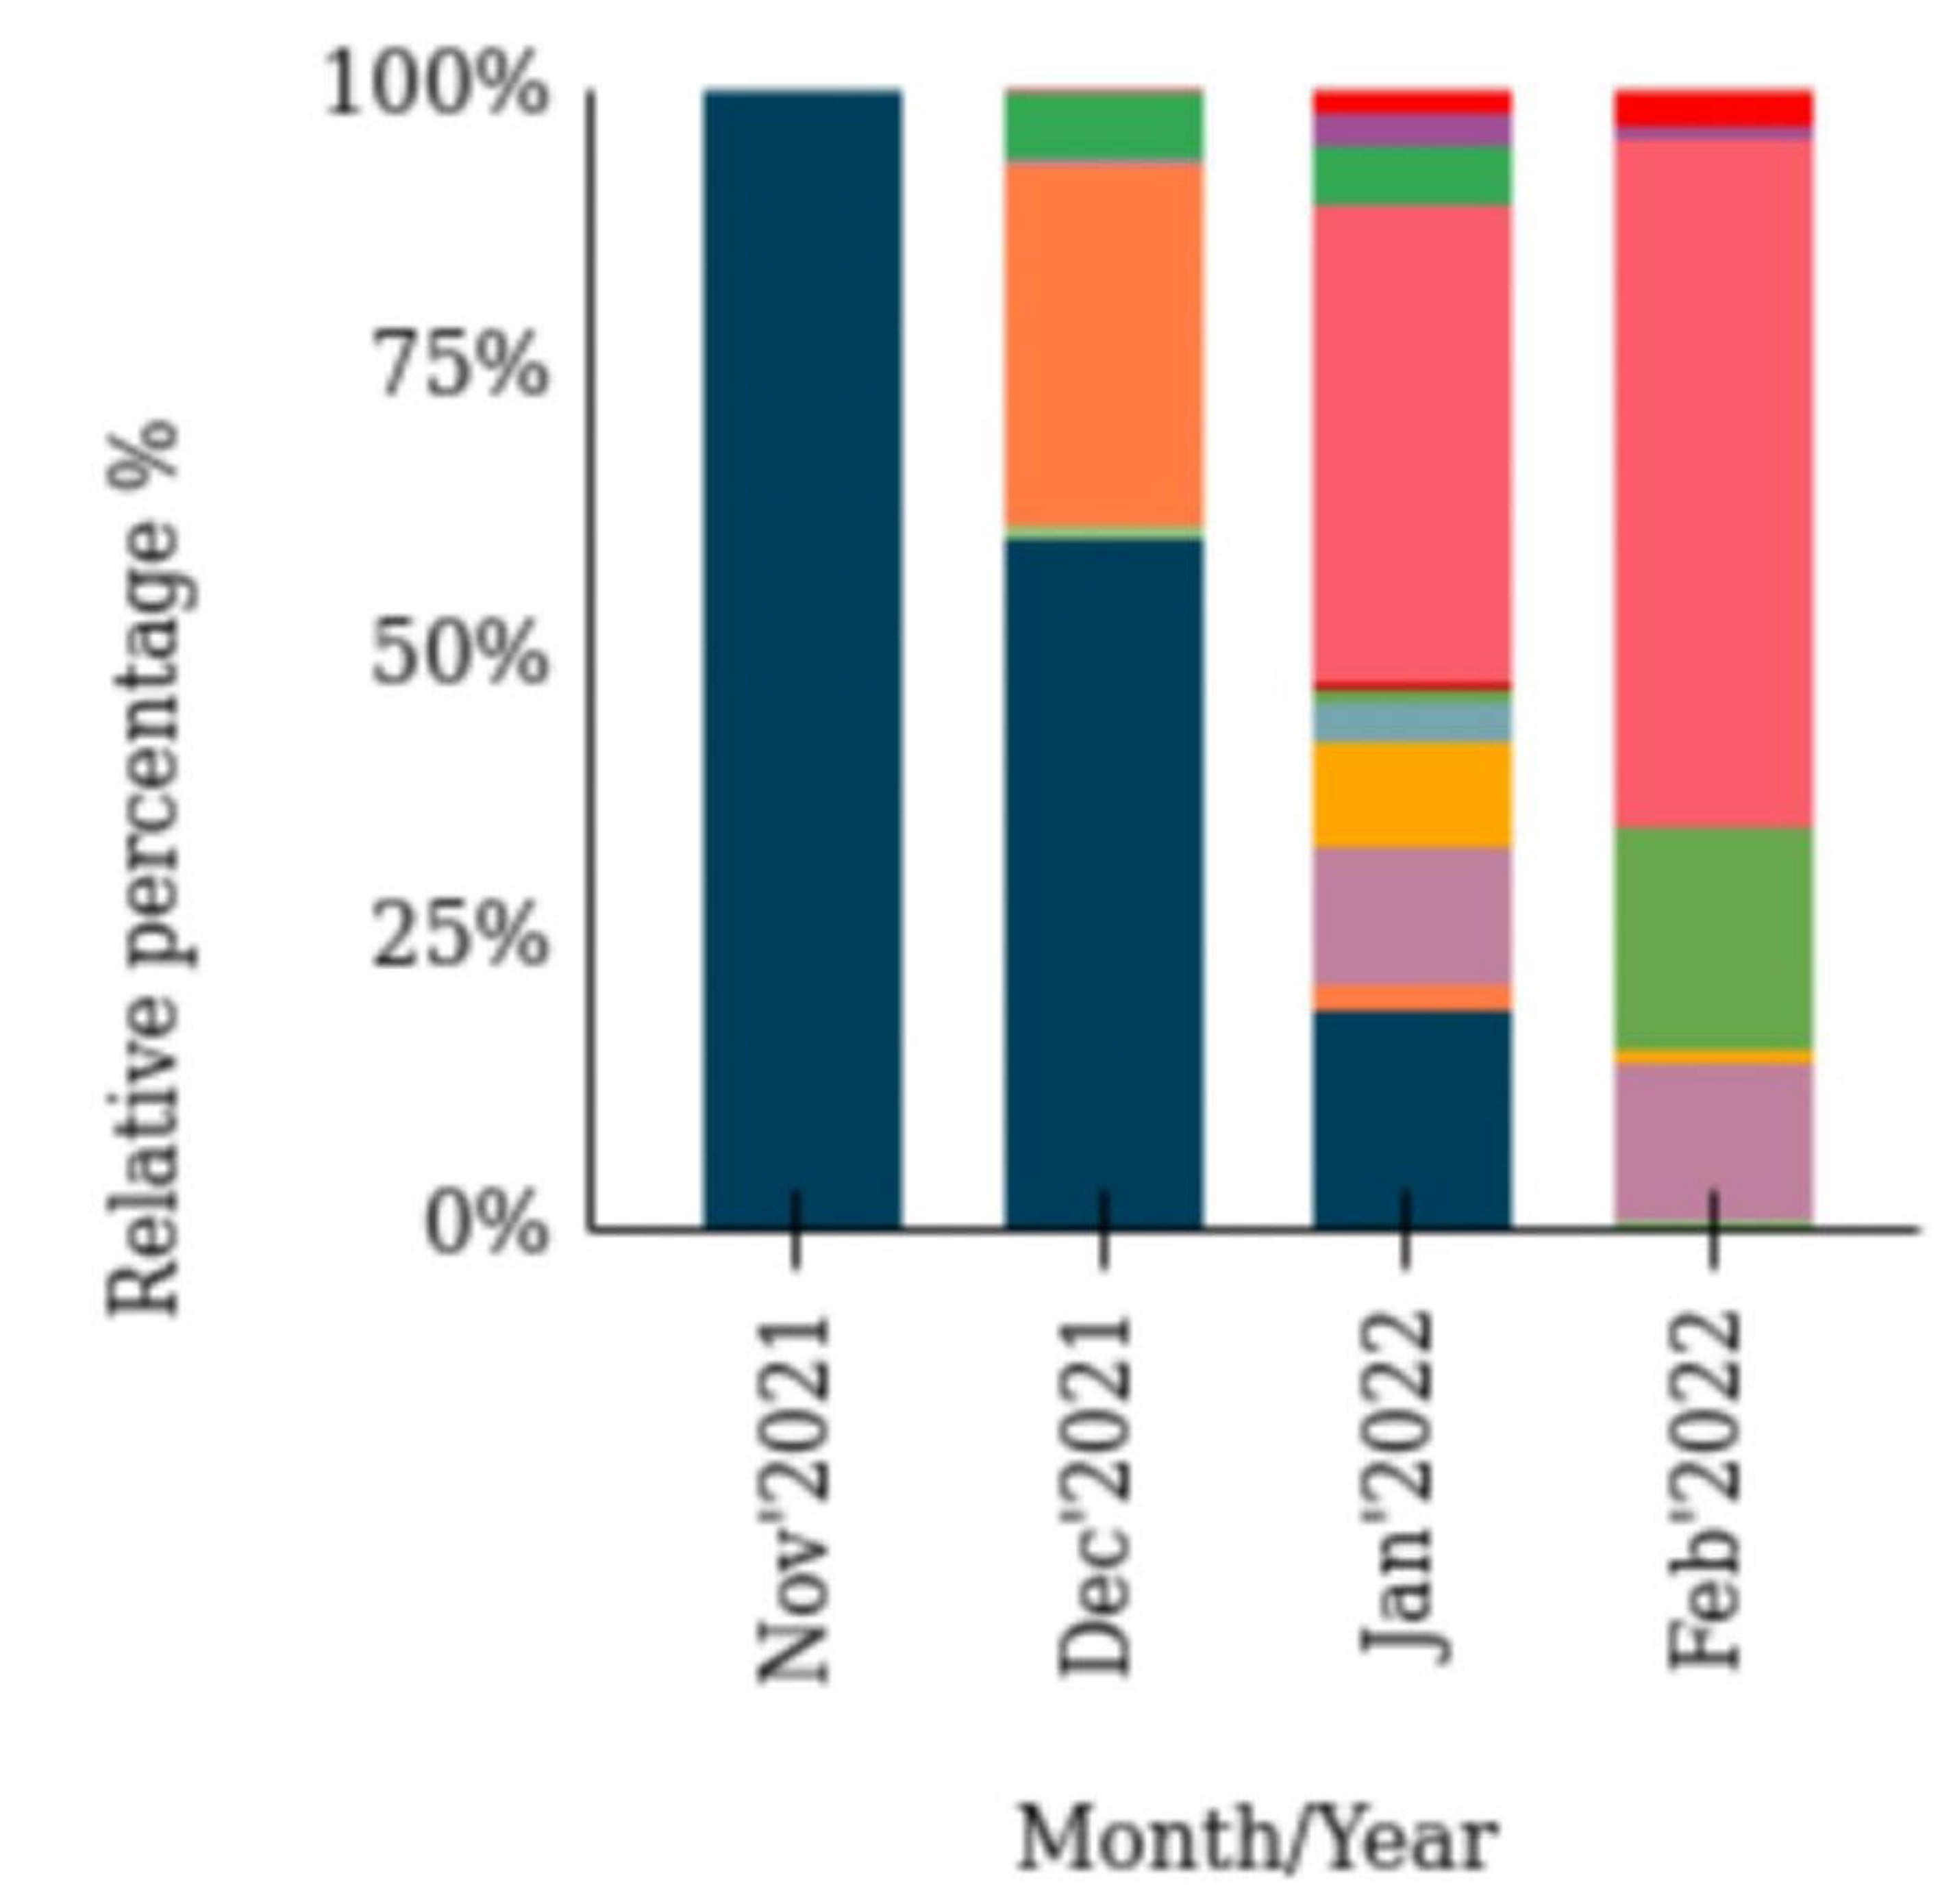**STP : Old Naidu**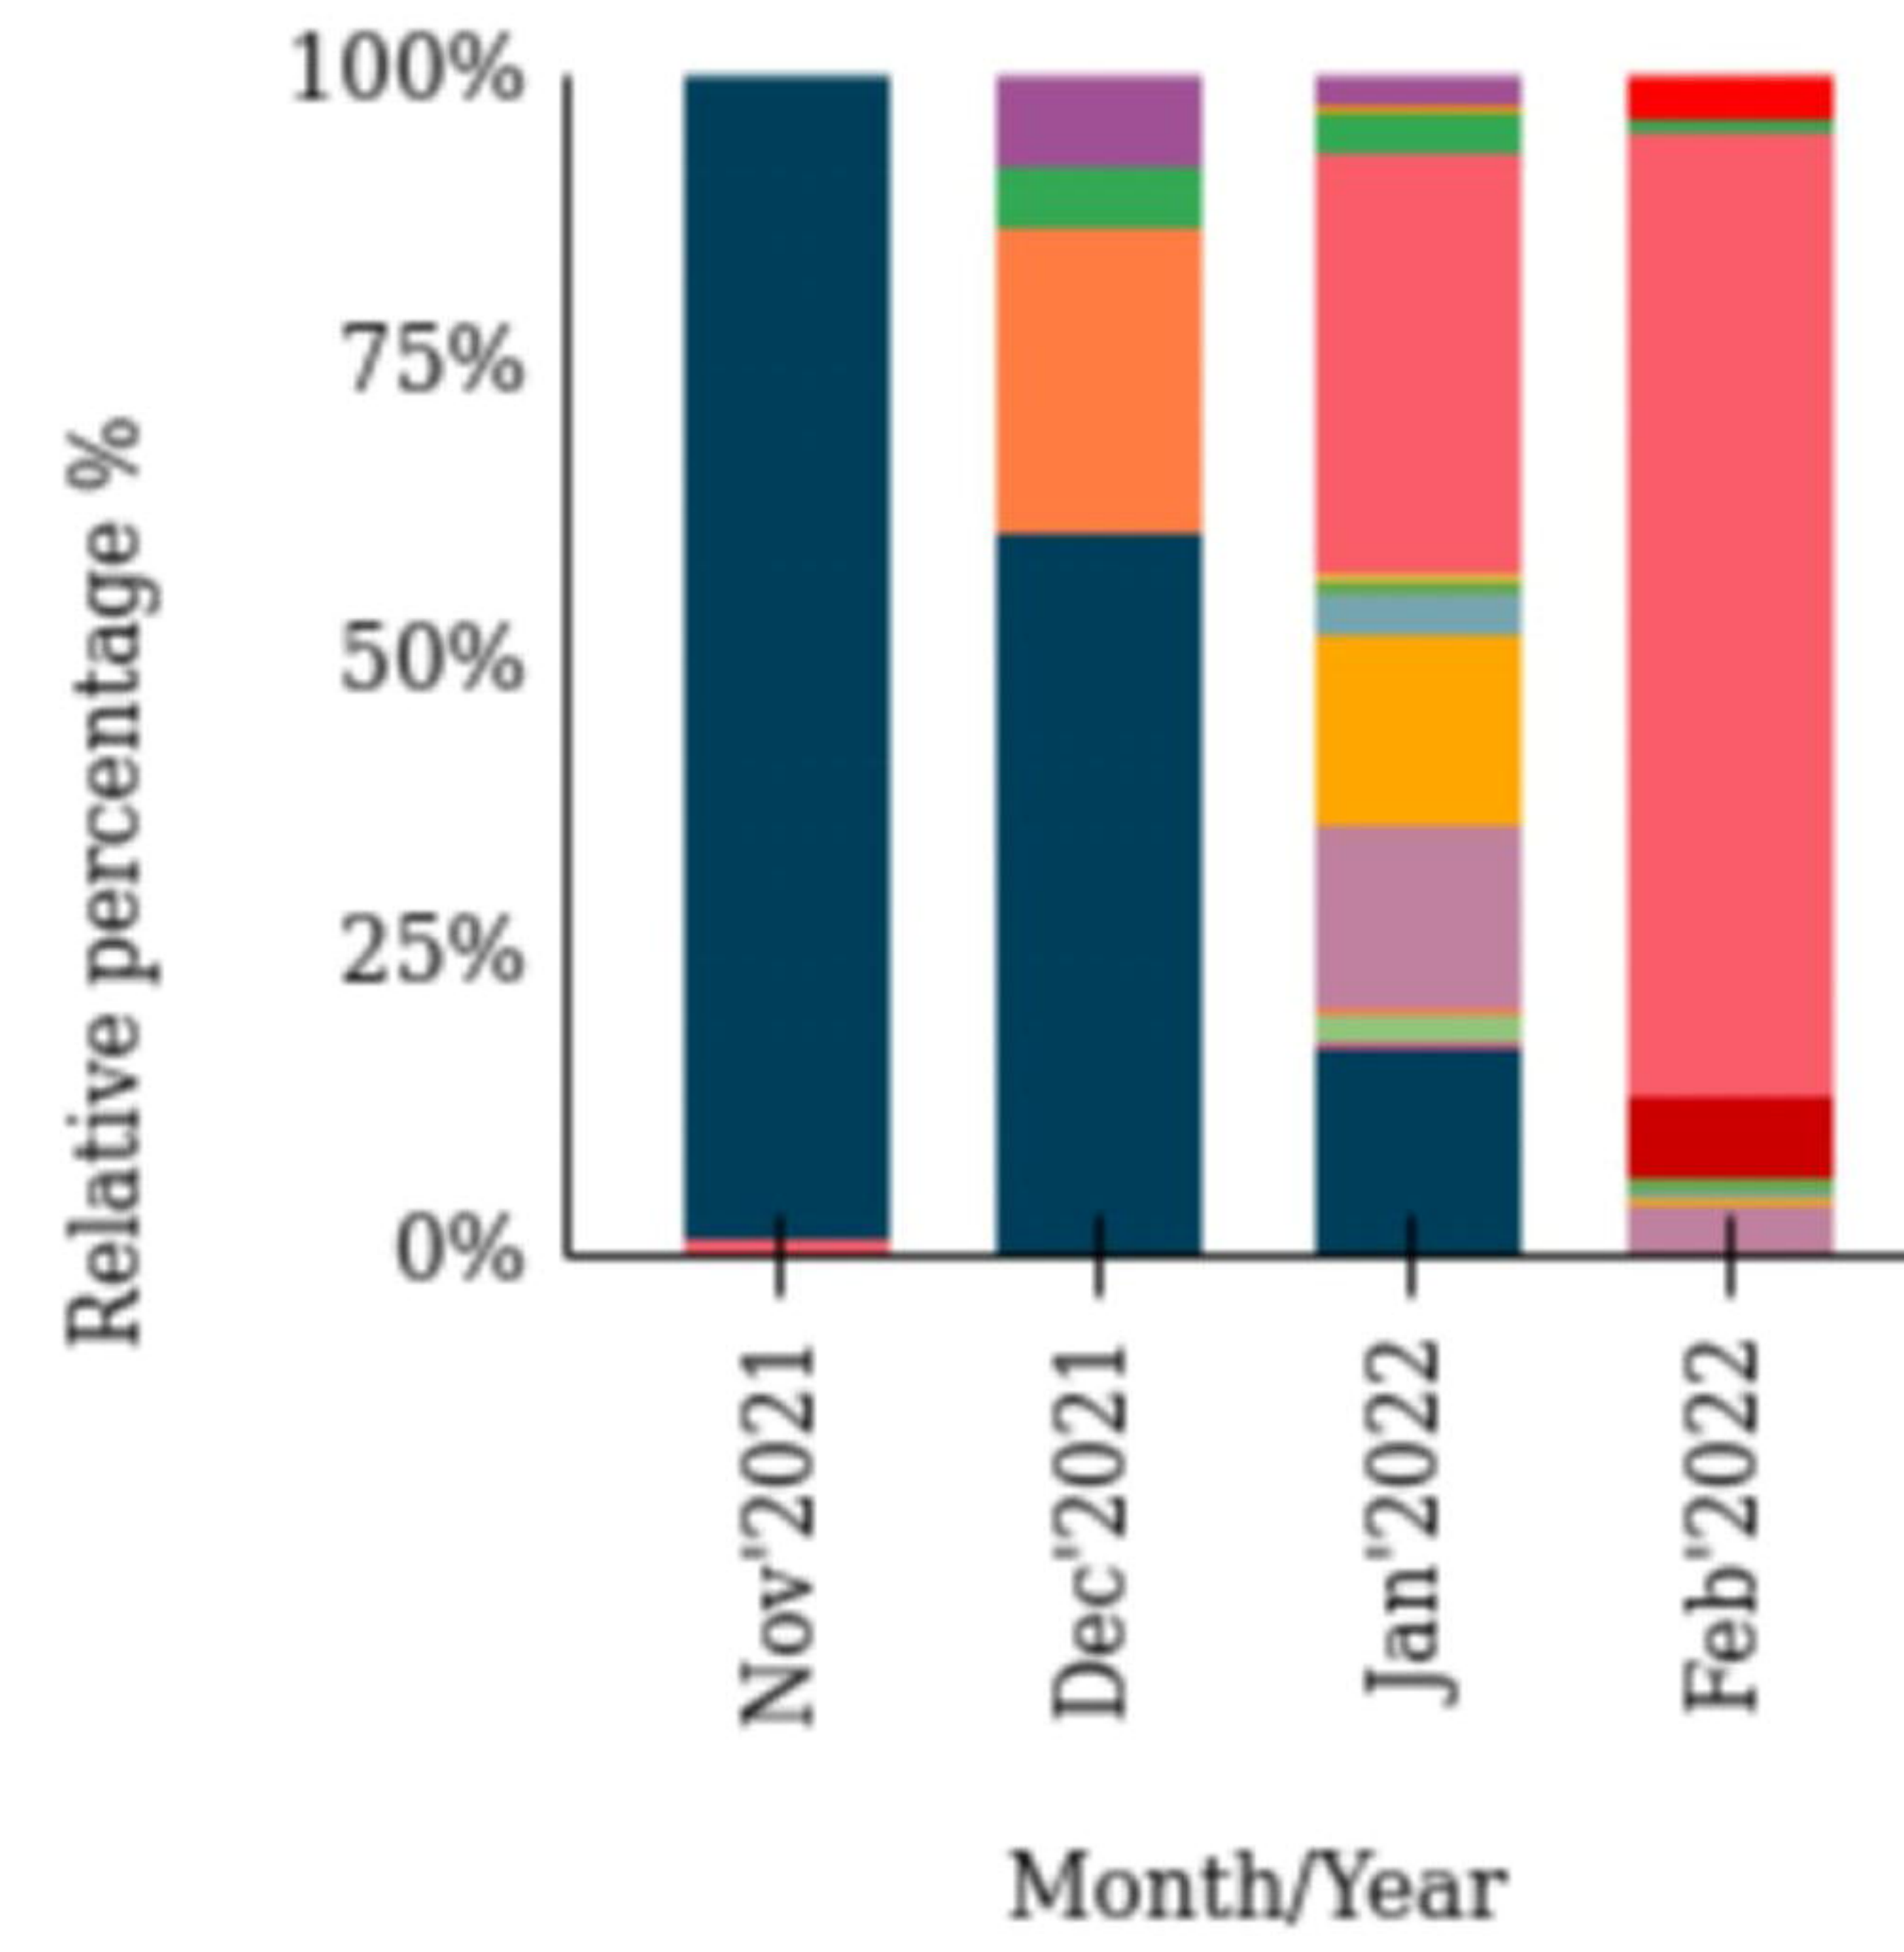**WASTEWATER**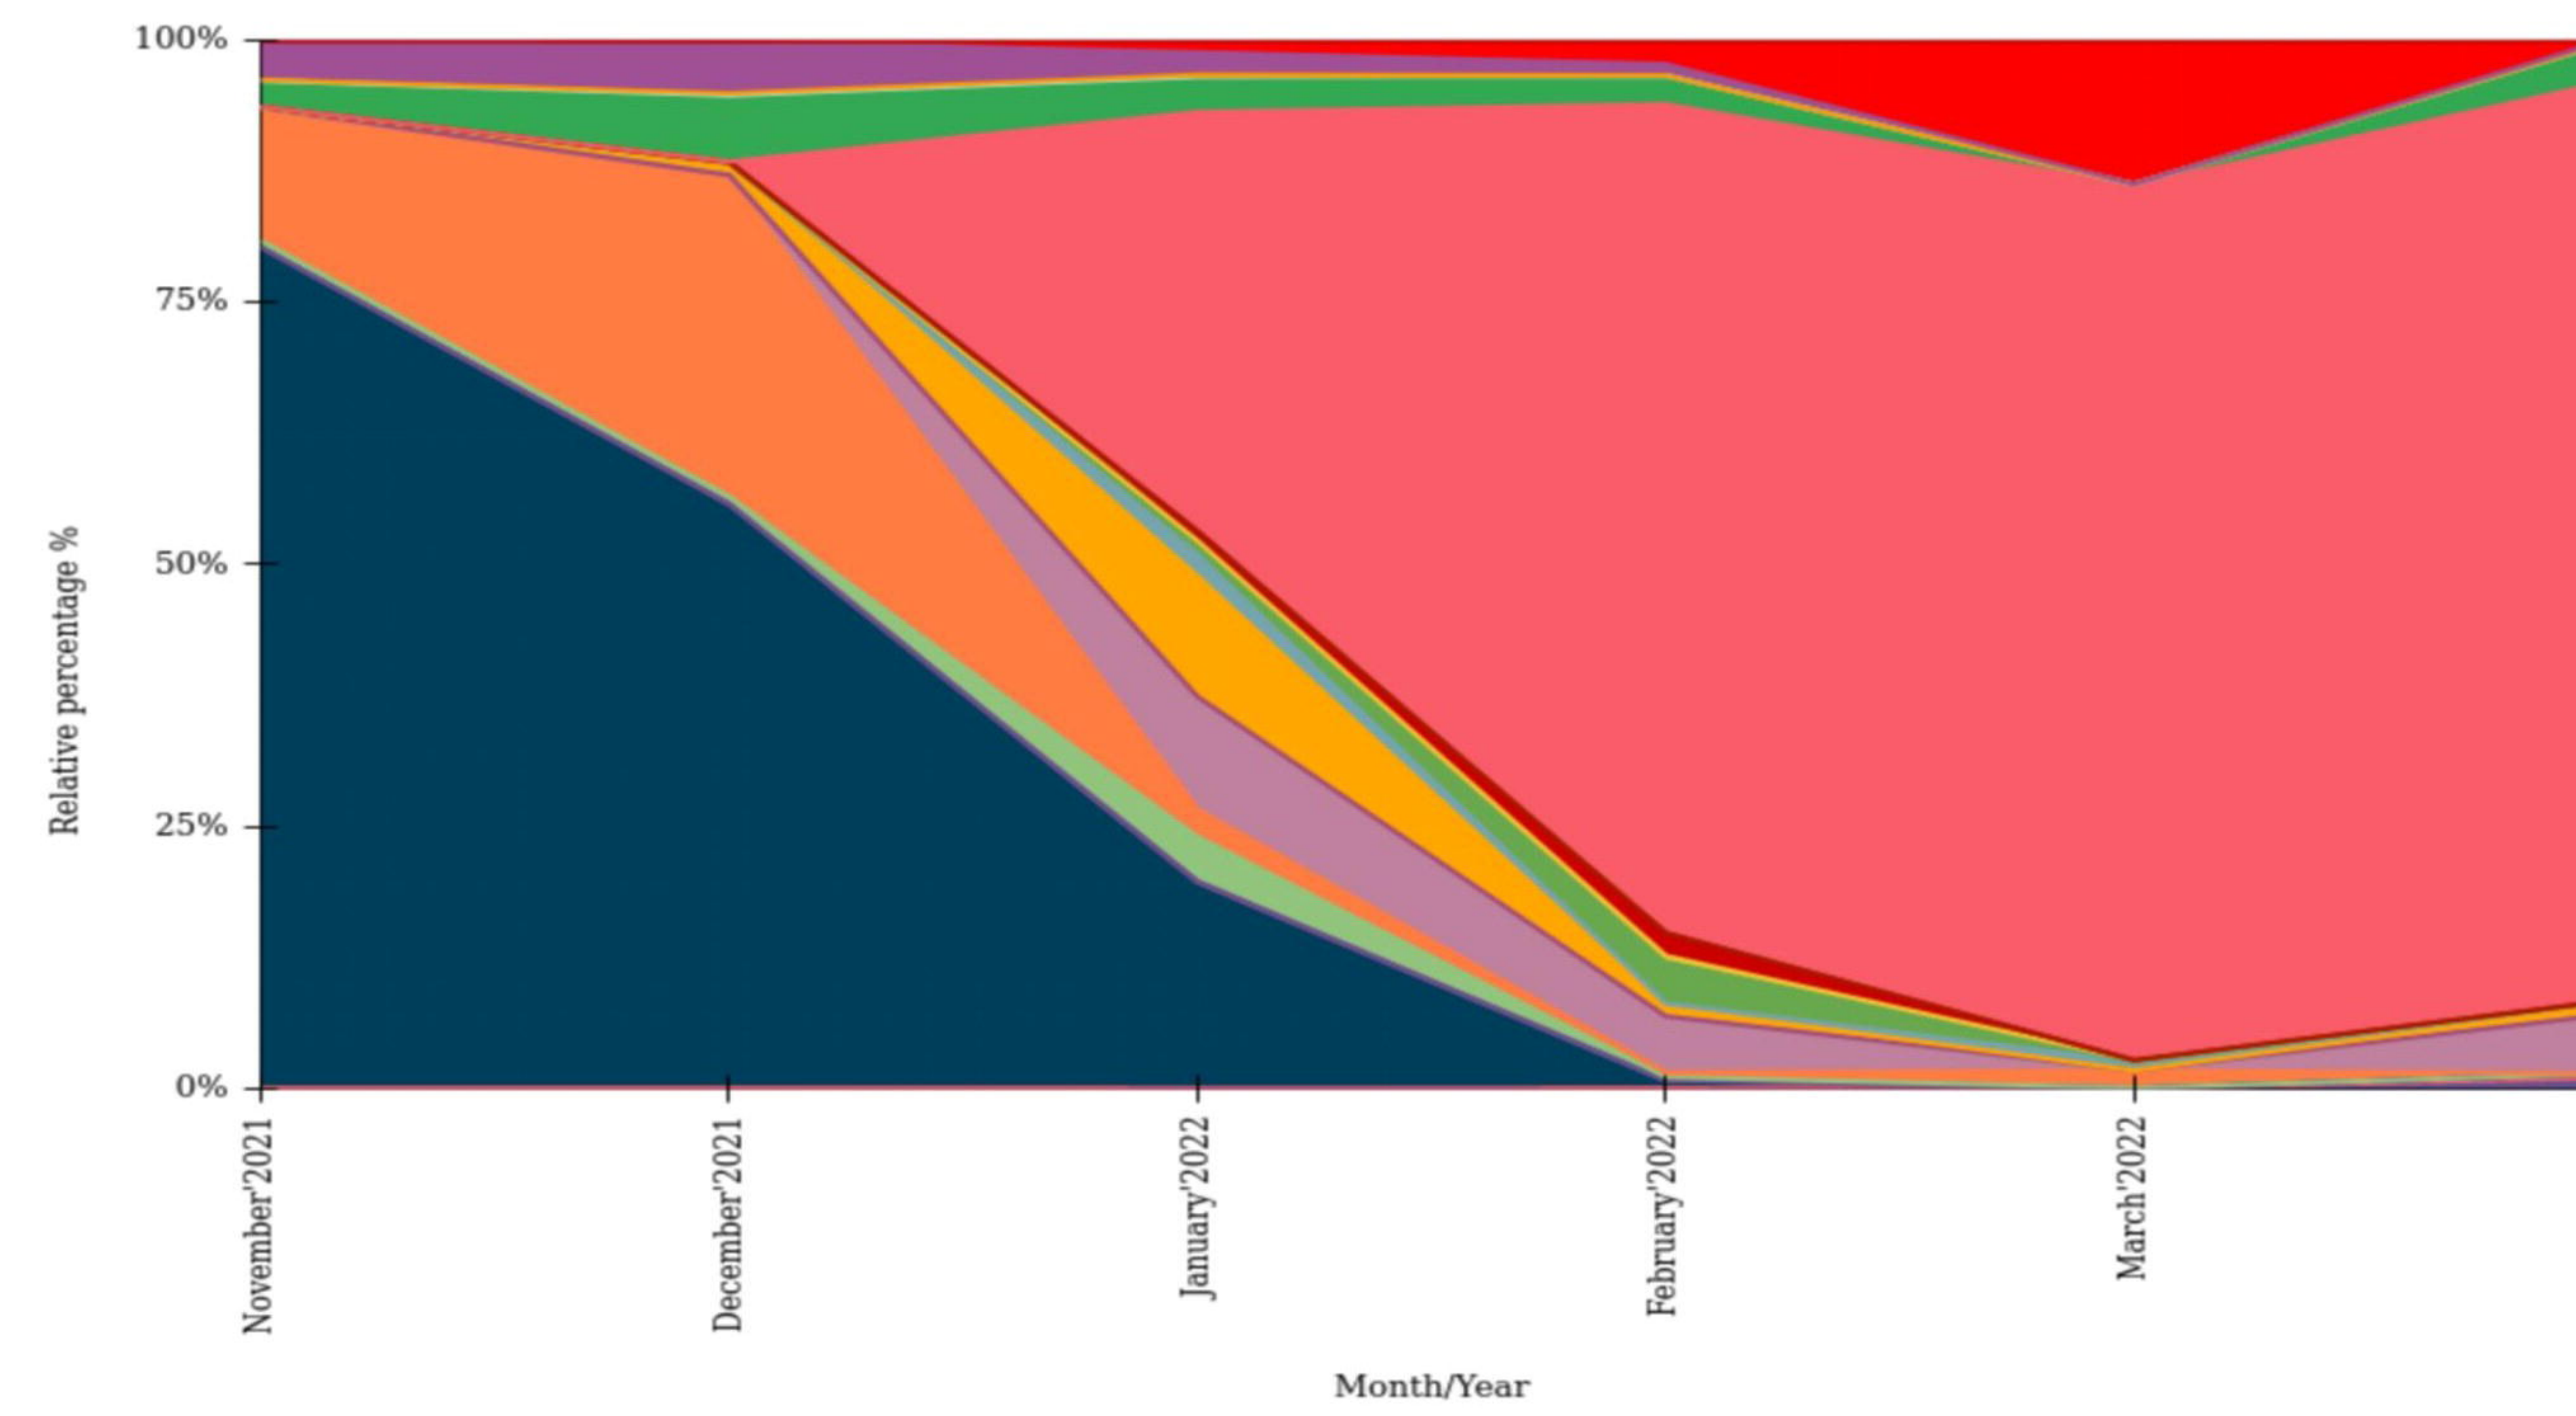**STP : Tanajiwadi**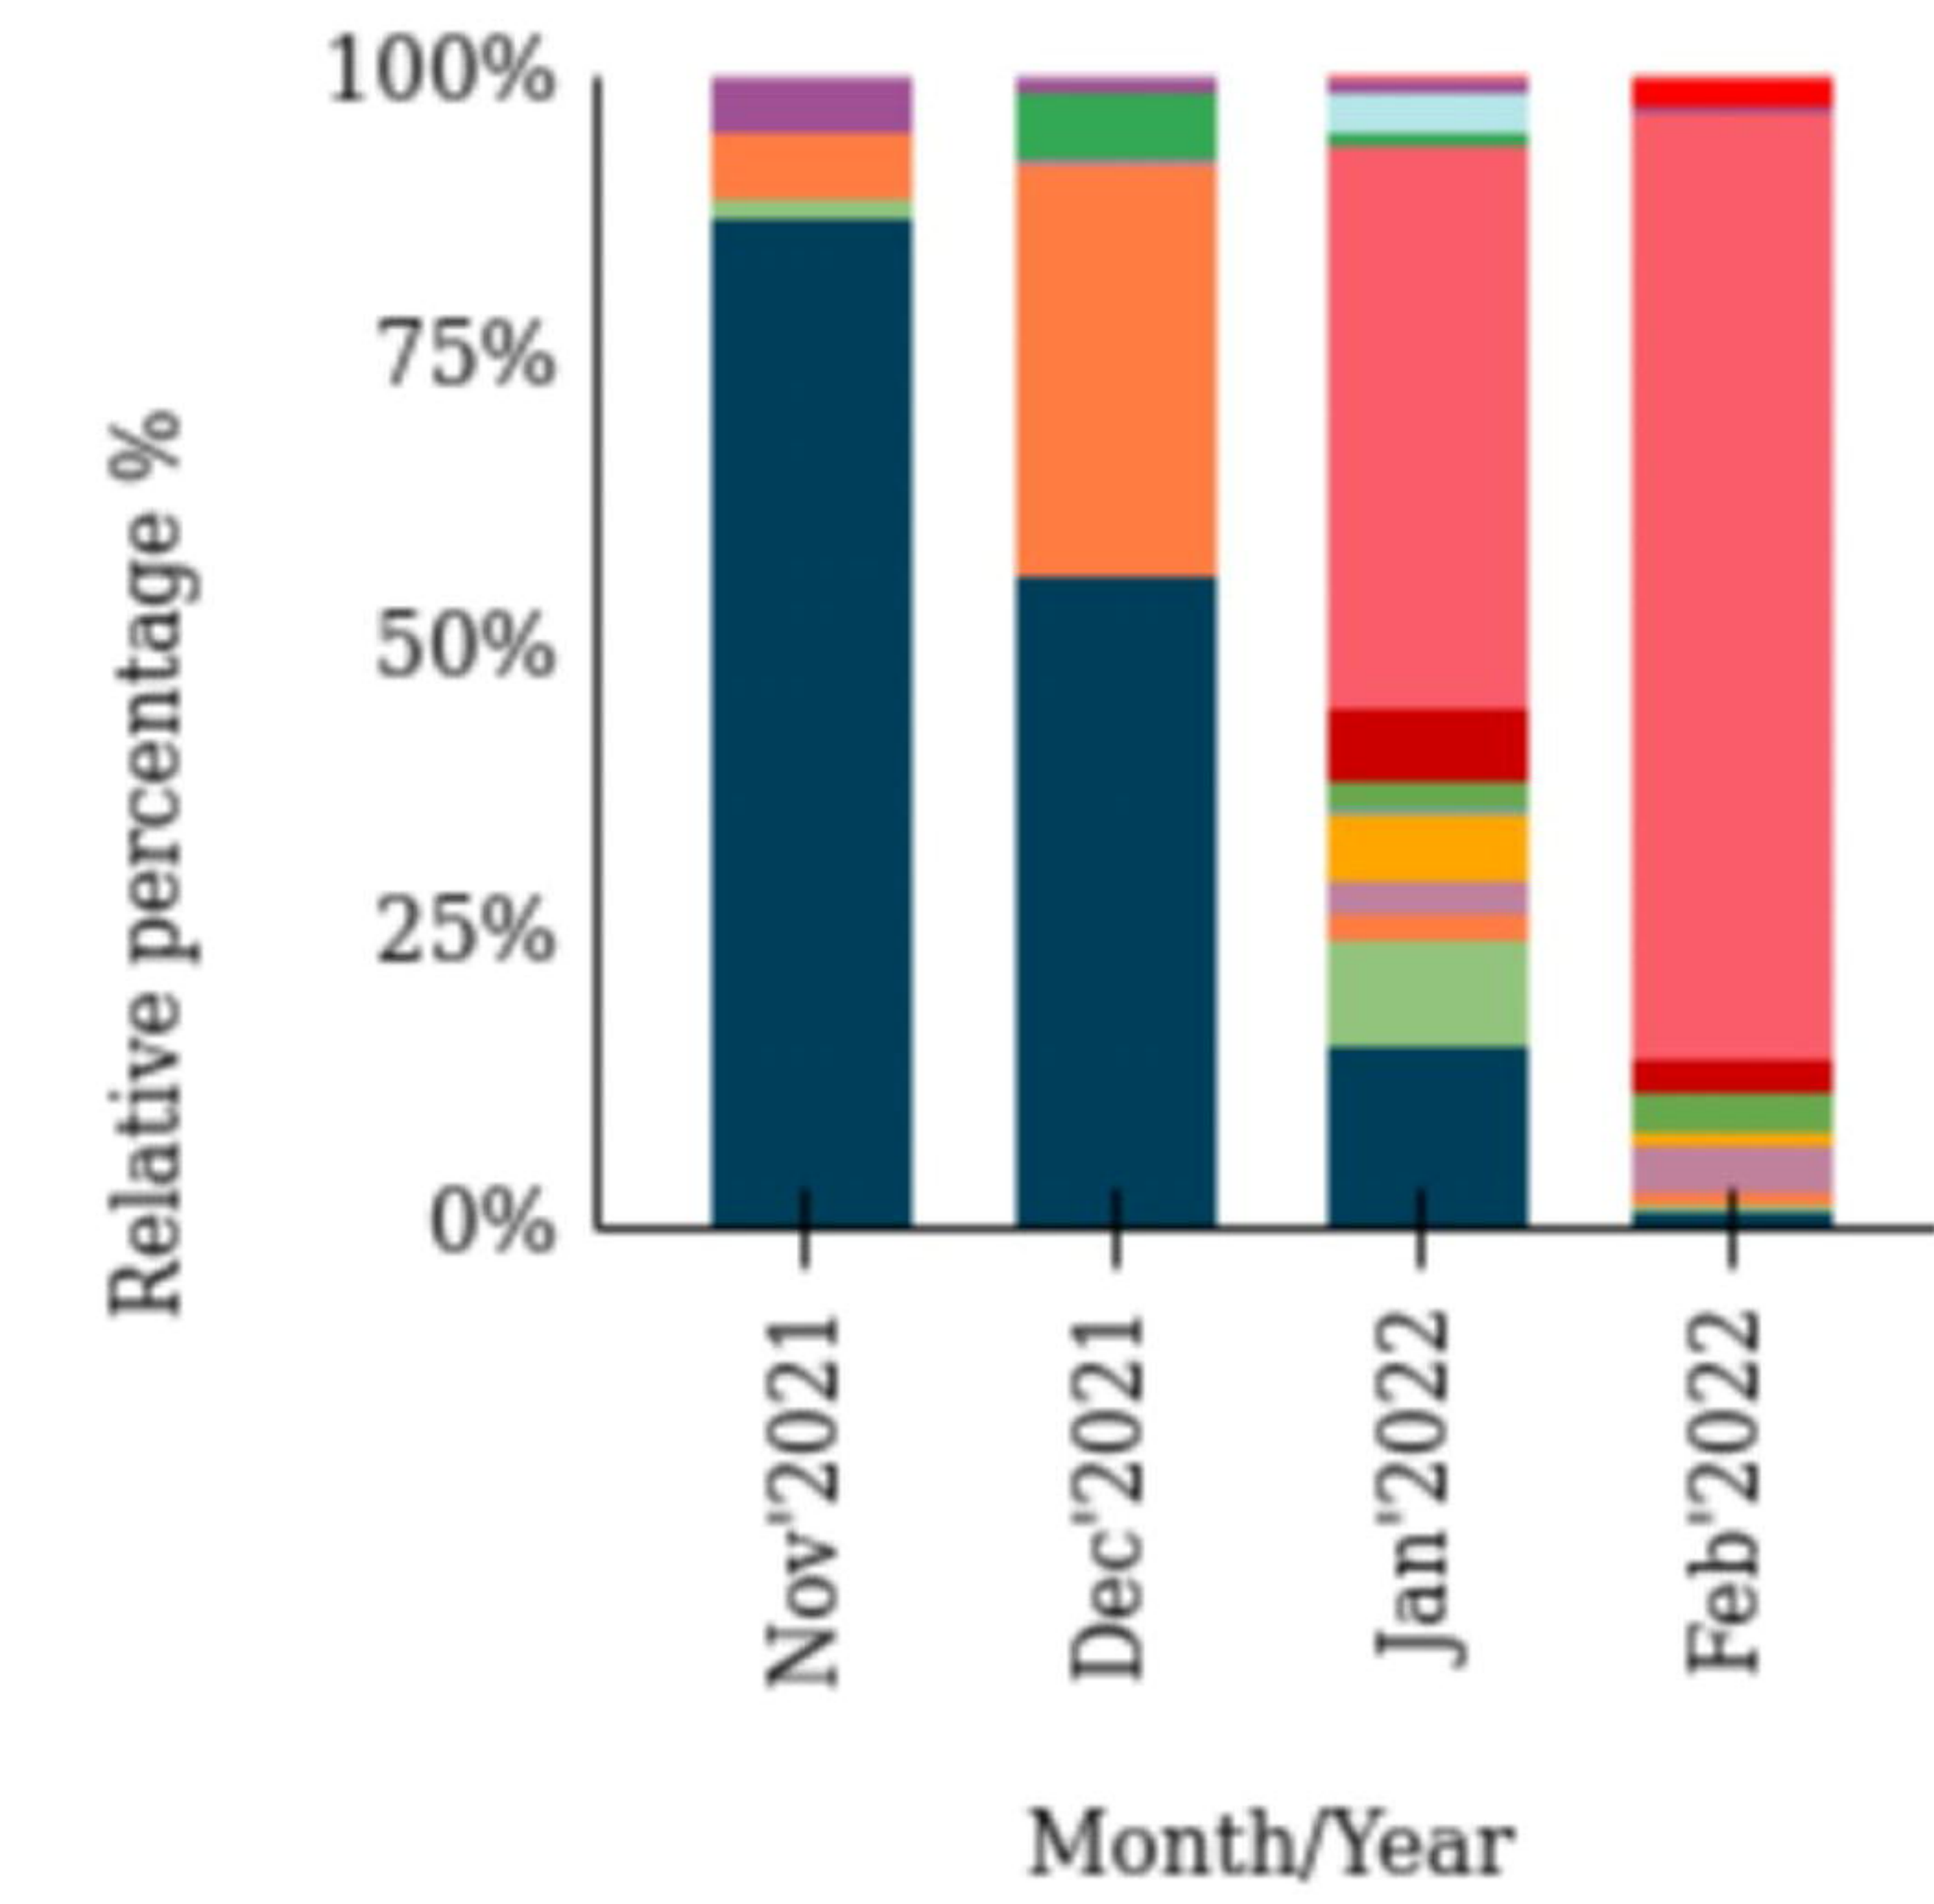**STP : New Naidu**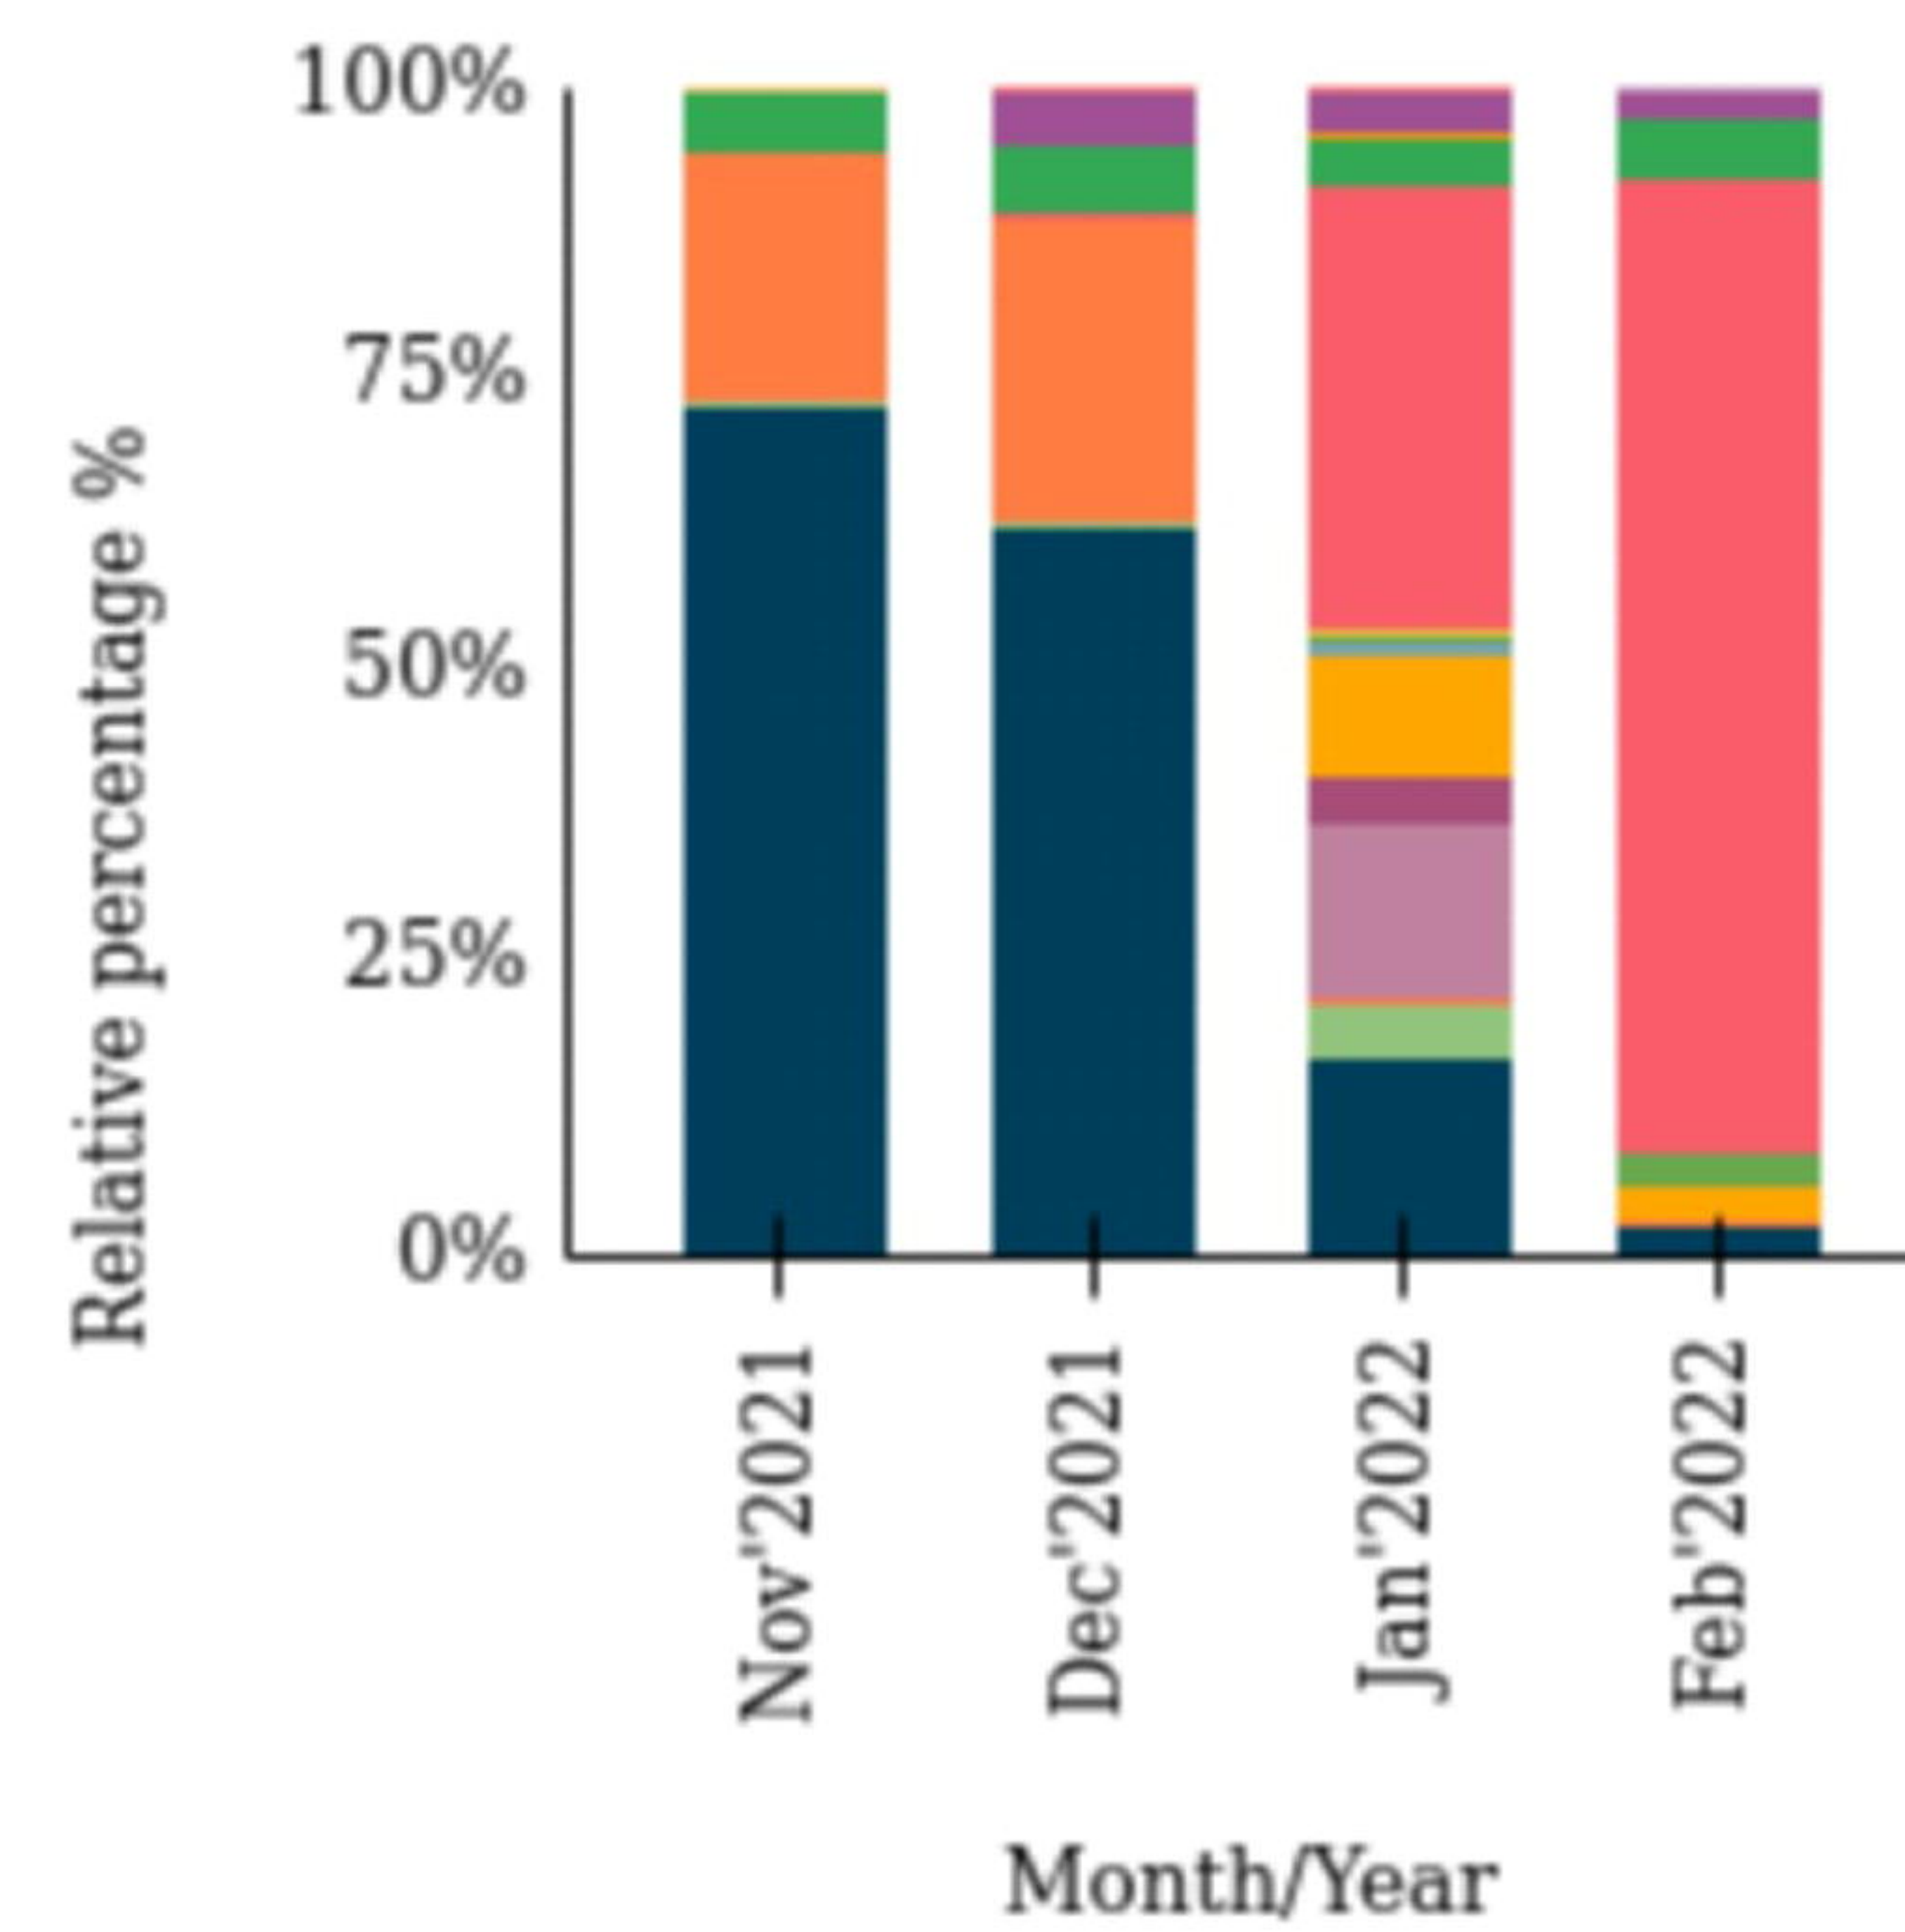**STP : Bhairobanala**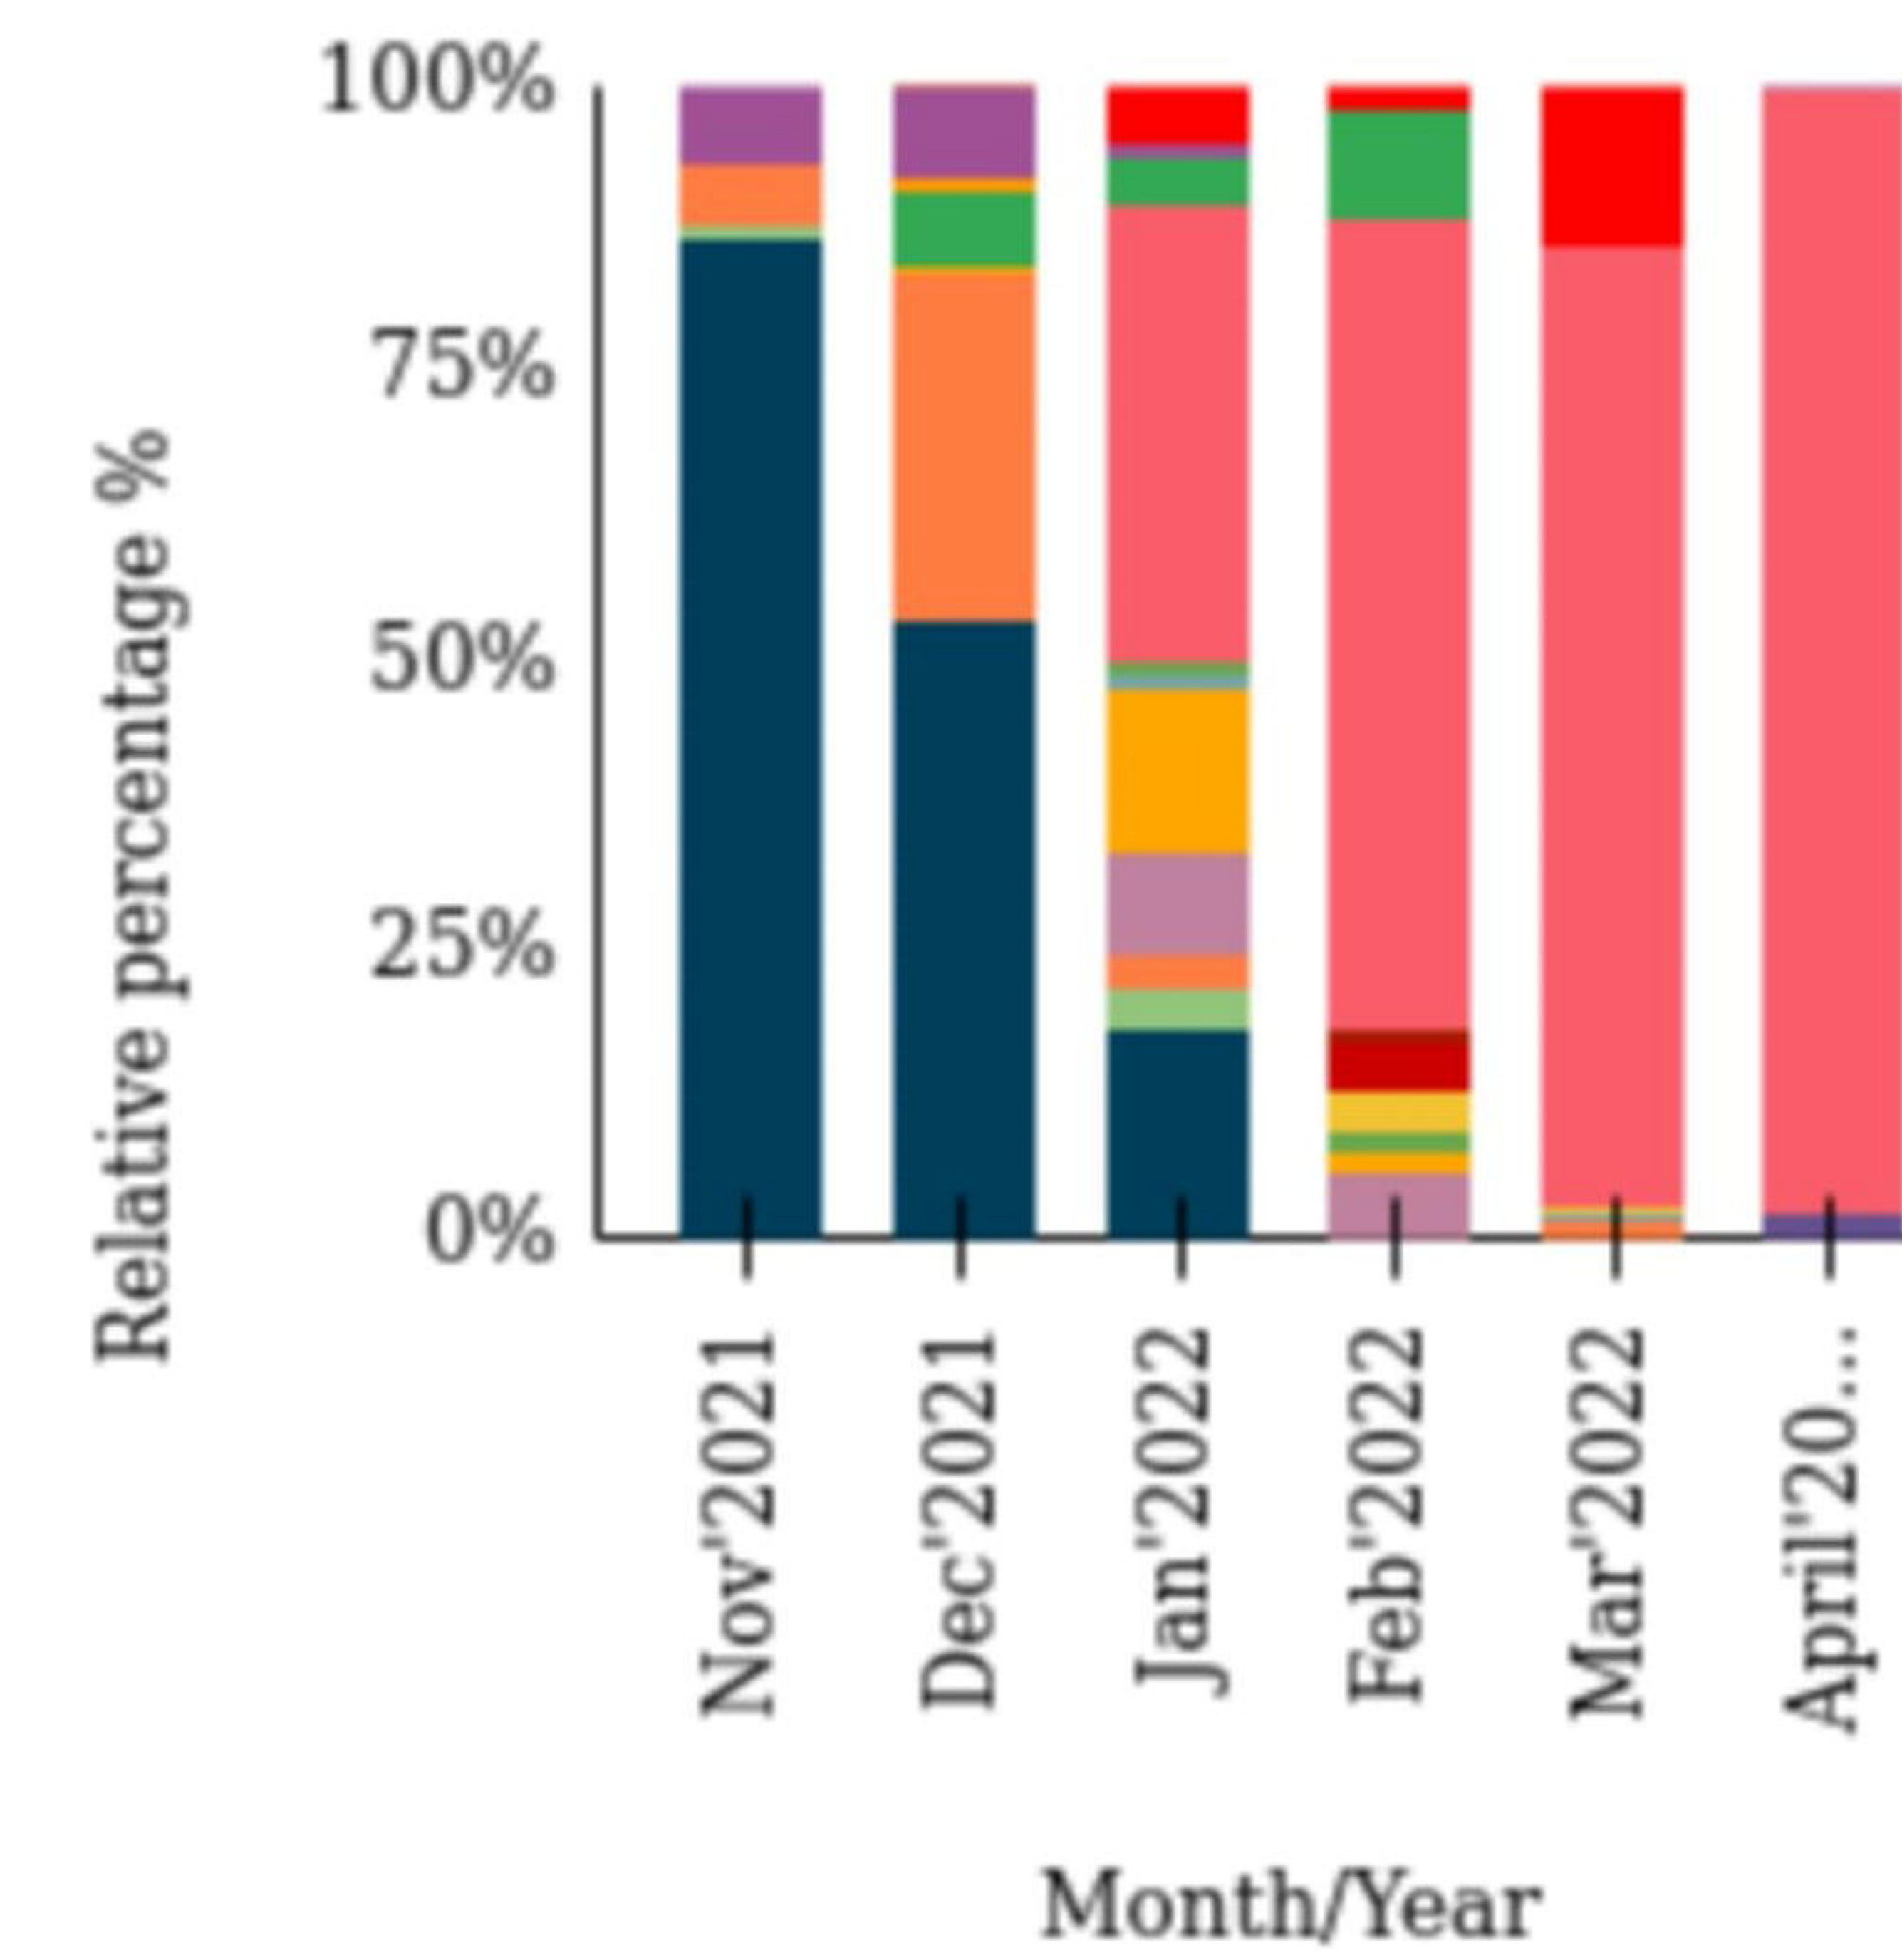**STP : Mundhwa**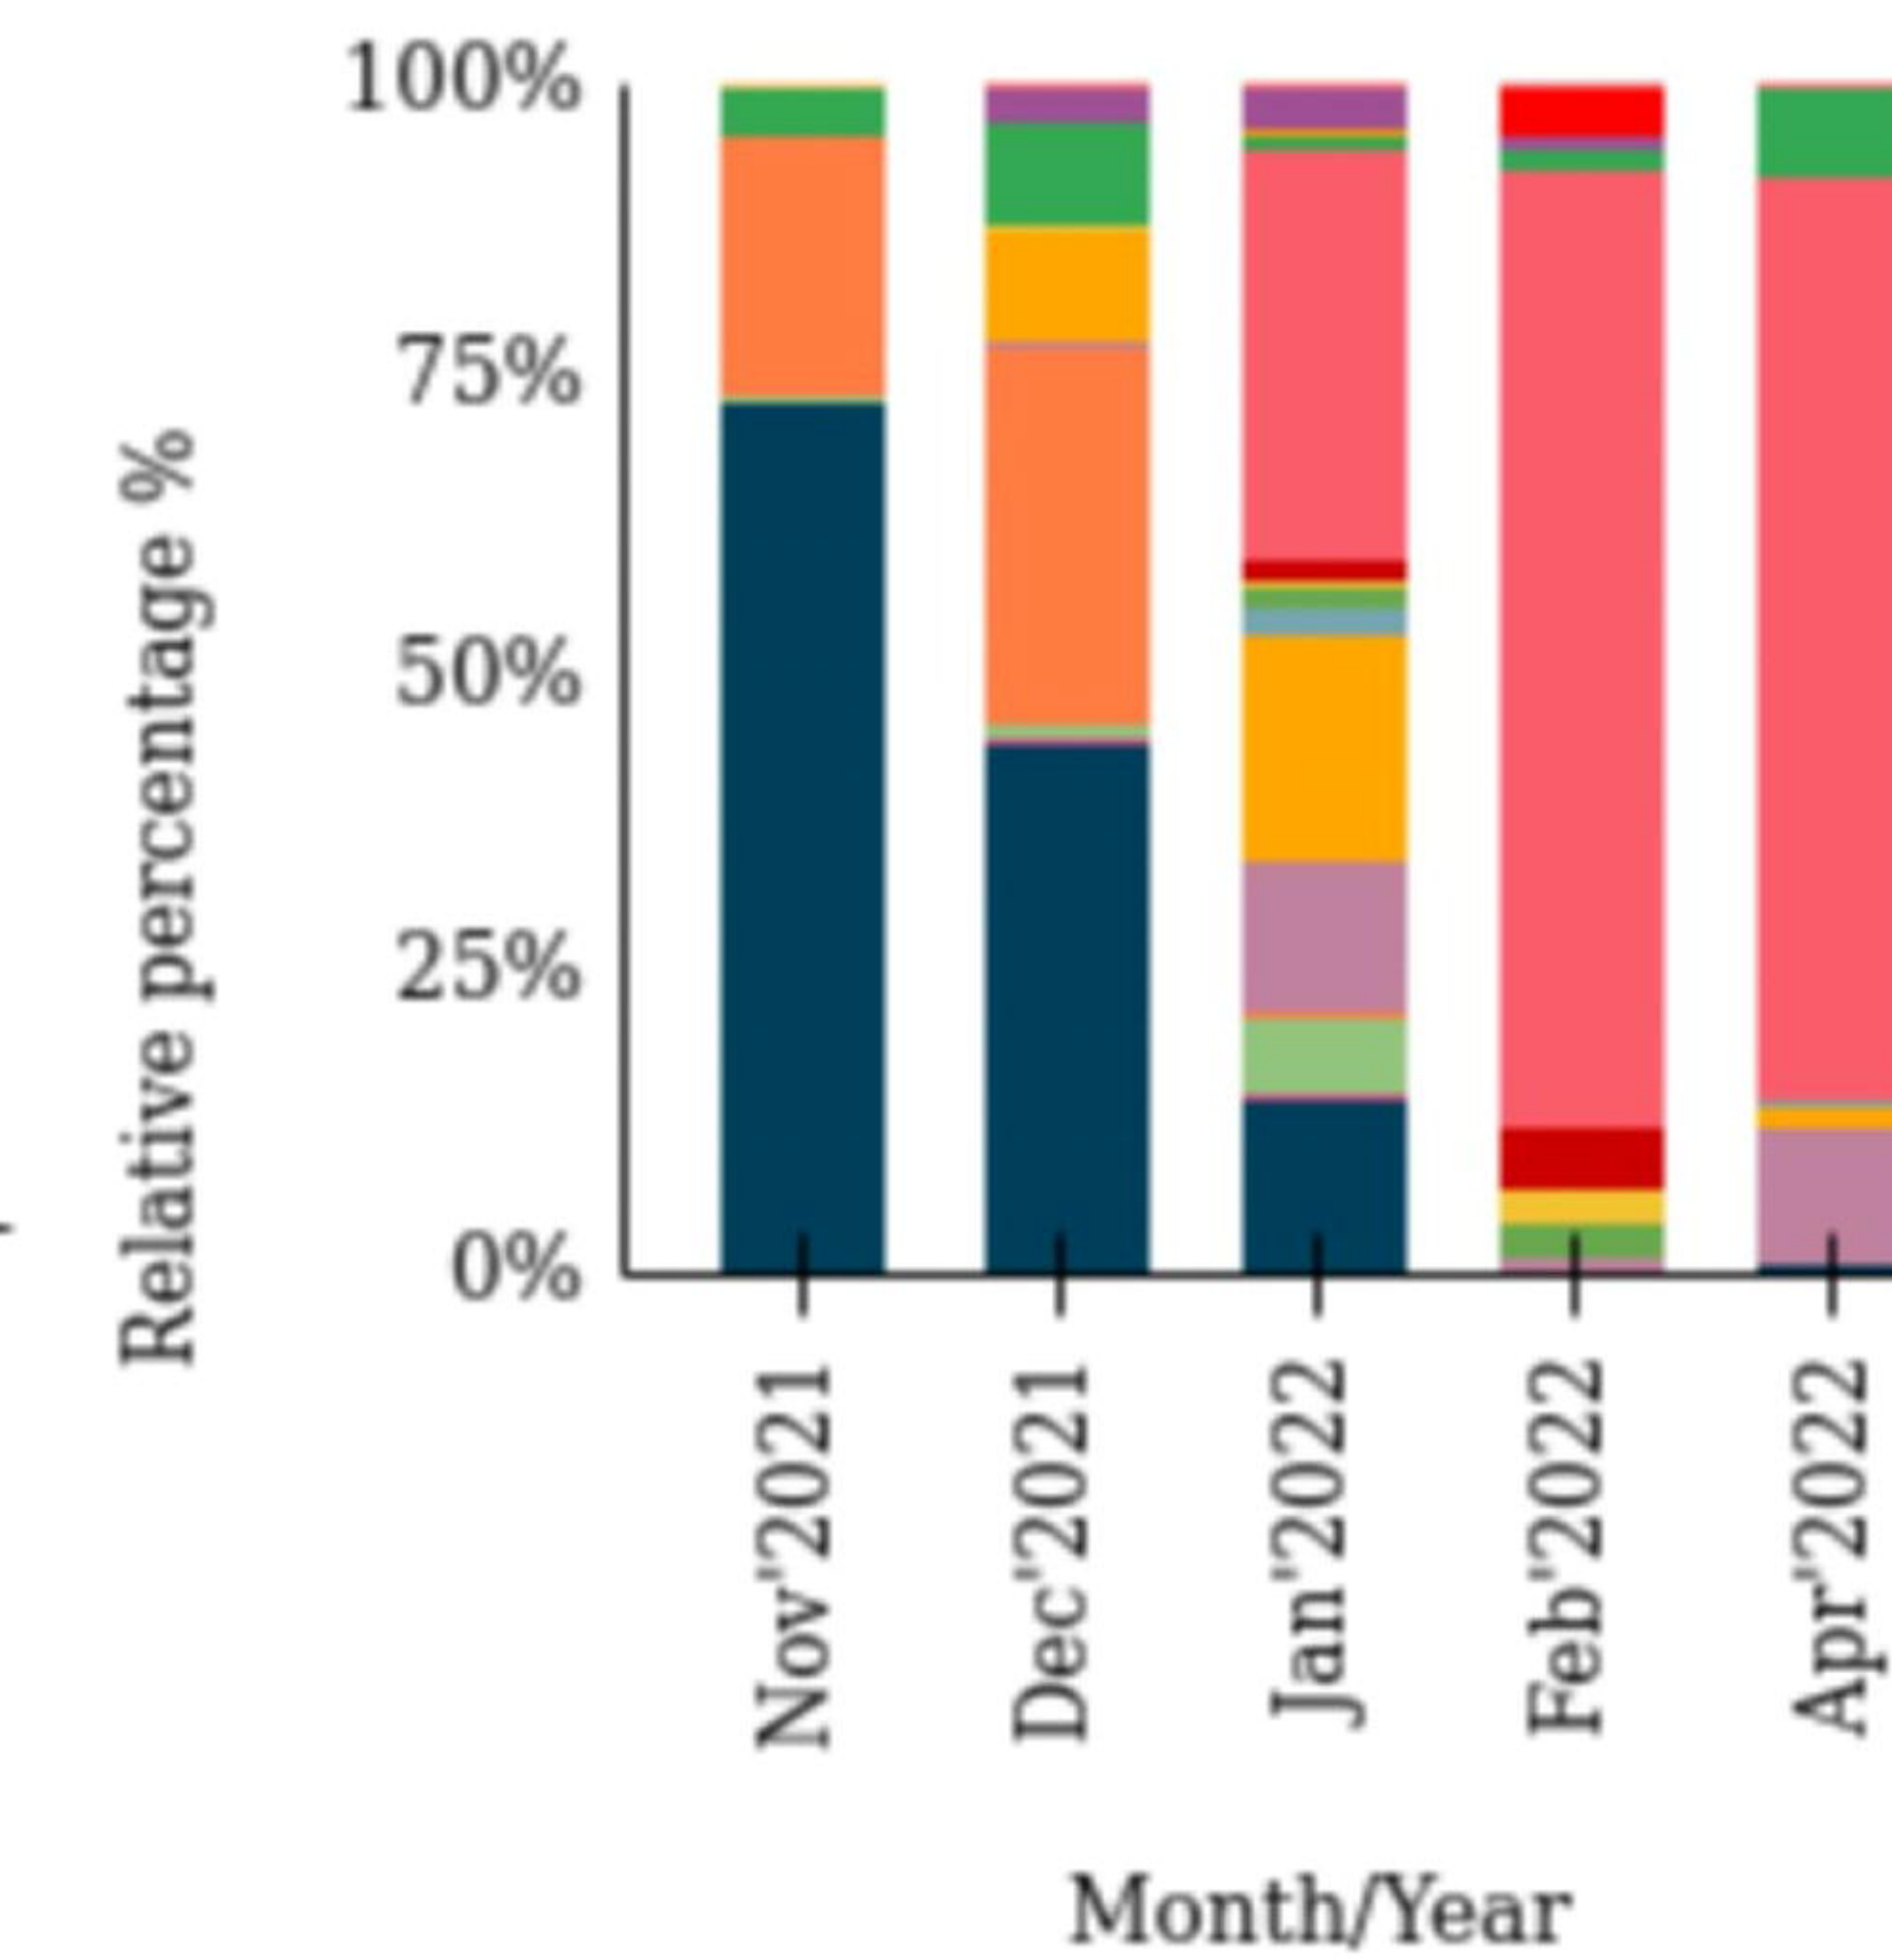**STP : Vitthalwadi**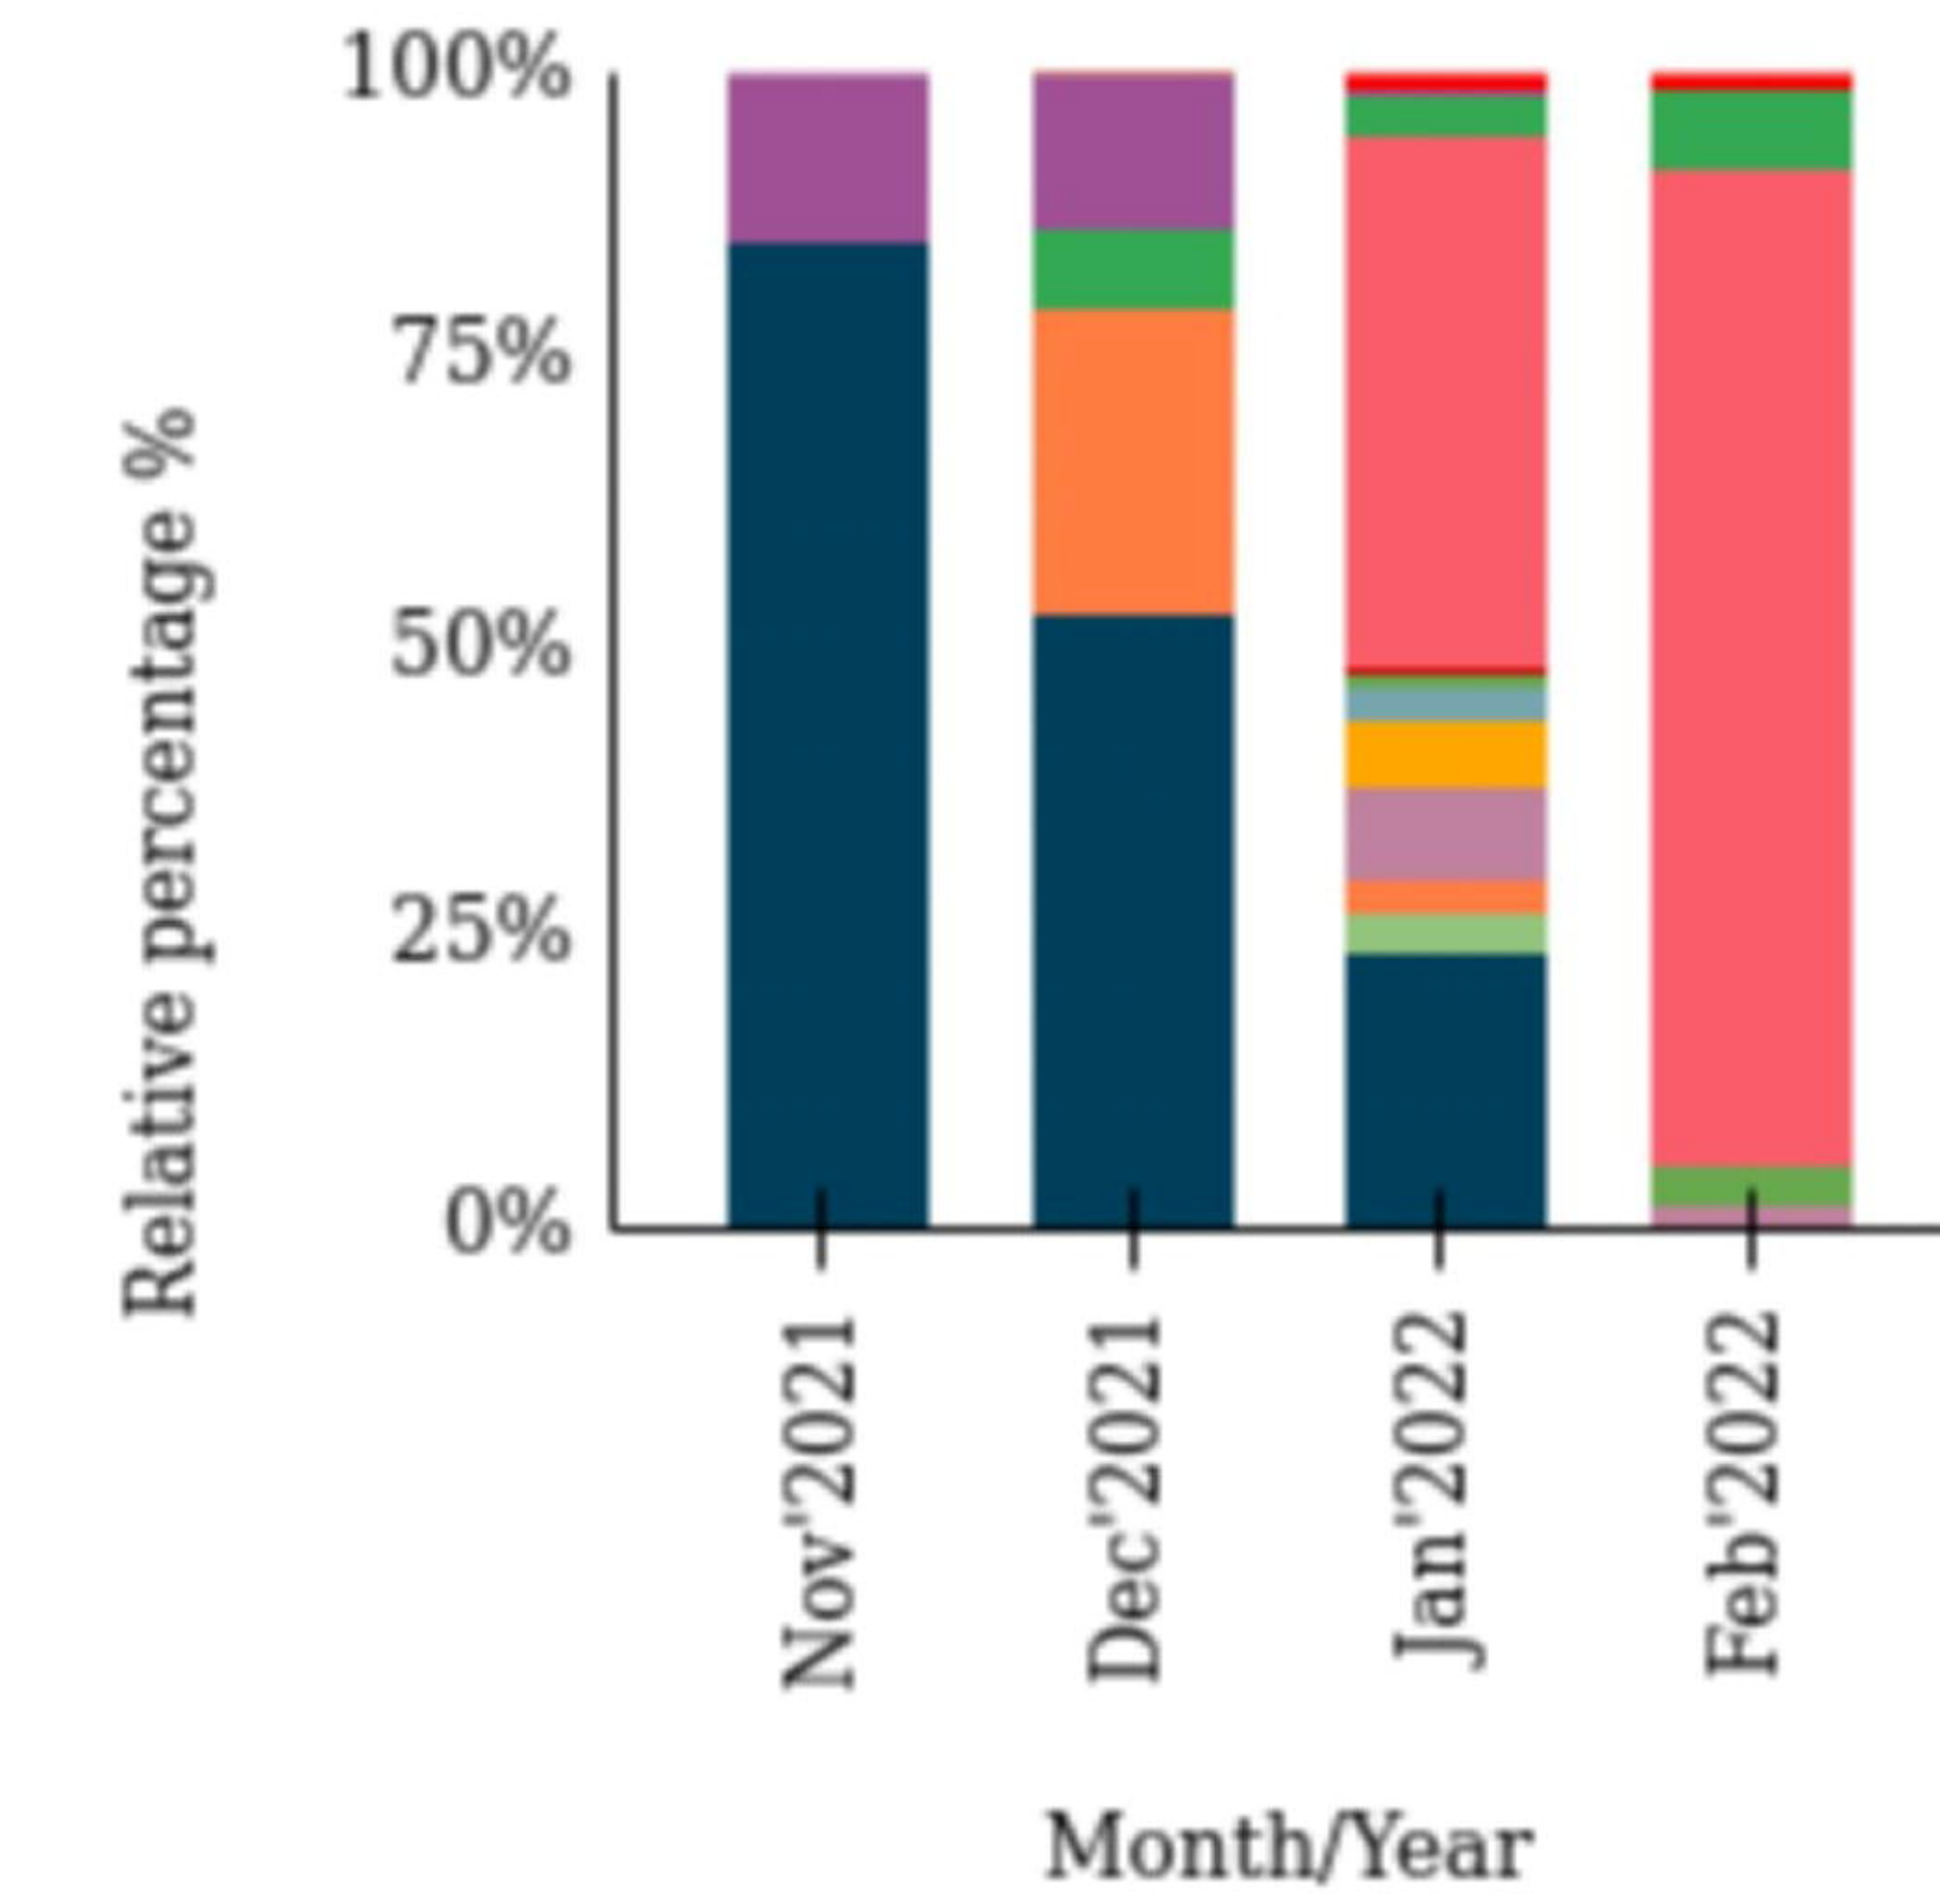

- Zeta
- XBB\_Rec
- Other
- Omicron\_BA.5
- Omicron\_BA.4
- Omicron\_BA.3
- Omicron\_BA.2.X
- Omicron\_BA.2.75
- Omicron\_BA.2.38
- Omicron\_BA.2.12
- Omicron\_BA.2.10
- Omicron\_BA.2
- Omicron\_BA.1.X
- Omicron\_BA.1
- Omicron
- Kappa\_B.1.617.1
- Iota\_B.1.526
- Gamma\_P.1
- Eta\_B.1.525
- Delta\_B.1.617.2
- Beta\_B.1.351
- Alpha\_B.1.1.7

© 2022 by the authors. Licensee MDPI, Basel, Switzerland. This article is an open access article distributed under the terms and conditions of the Creative Commons Attribution (CC BY) license (<https://creativecommons.org/licenses/by/4.0/>).

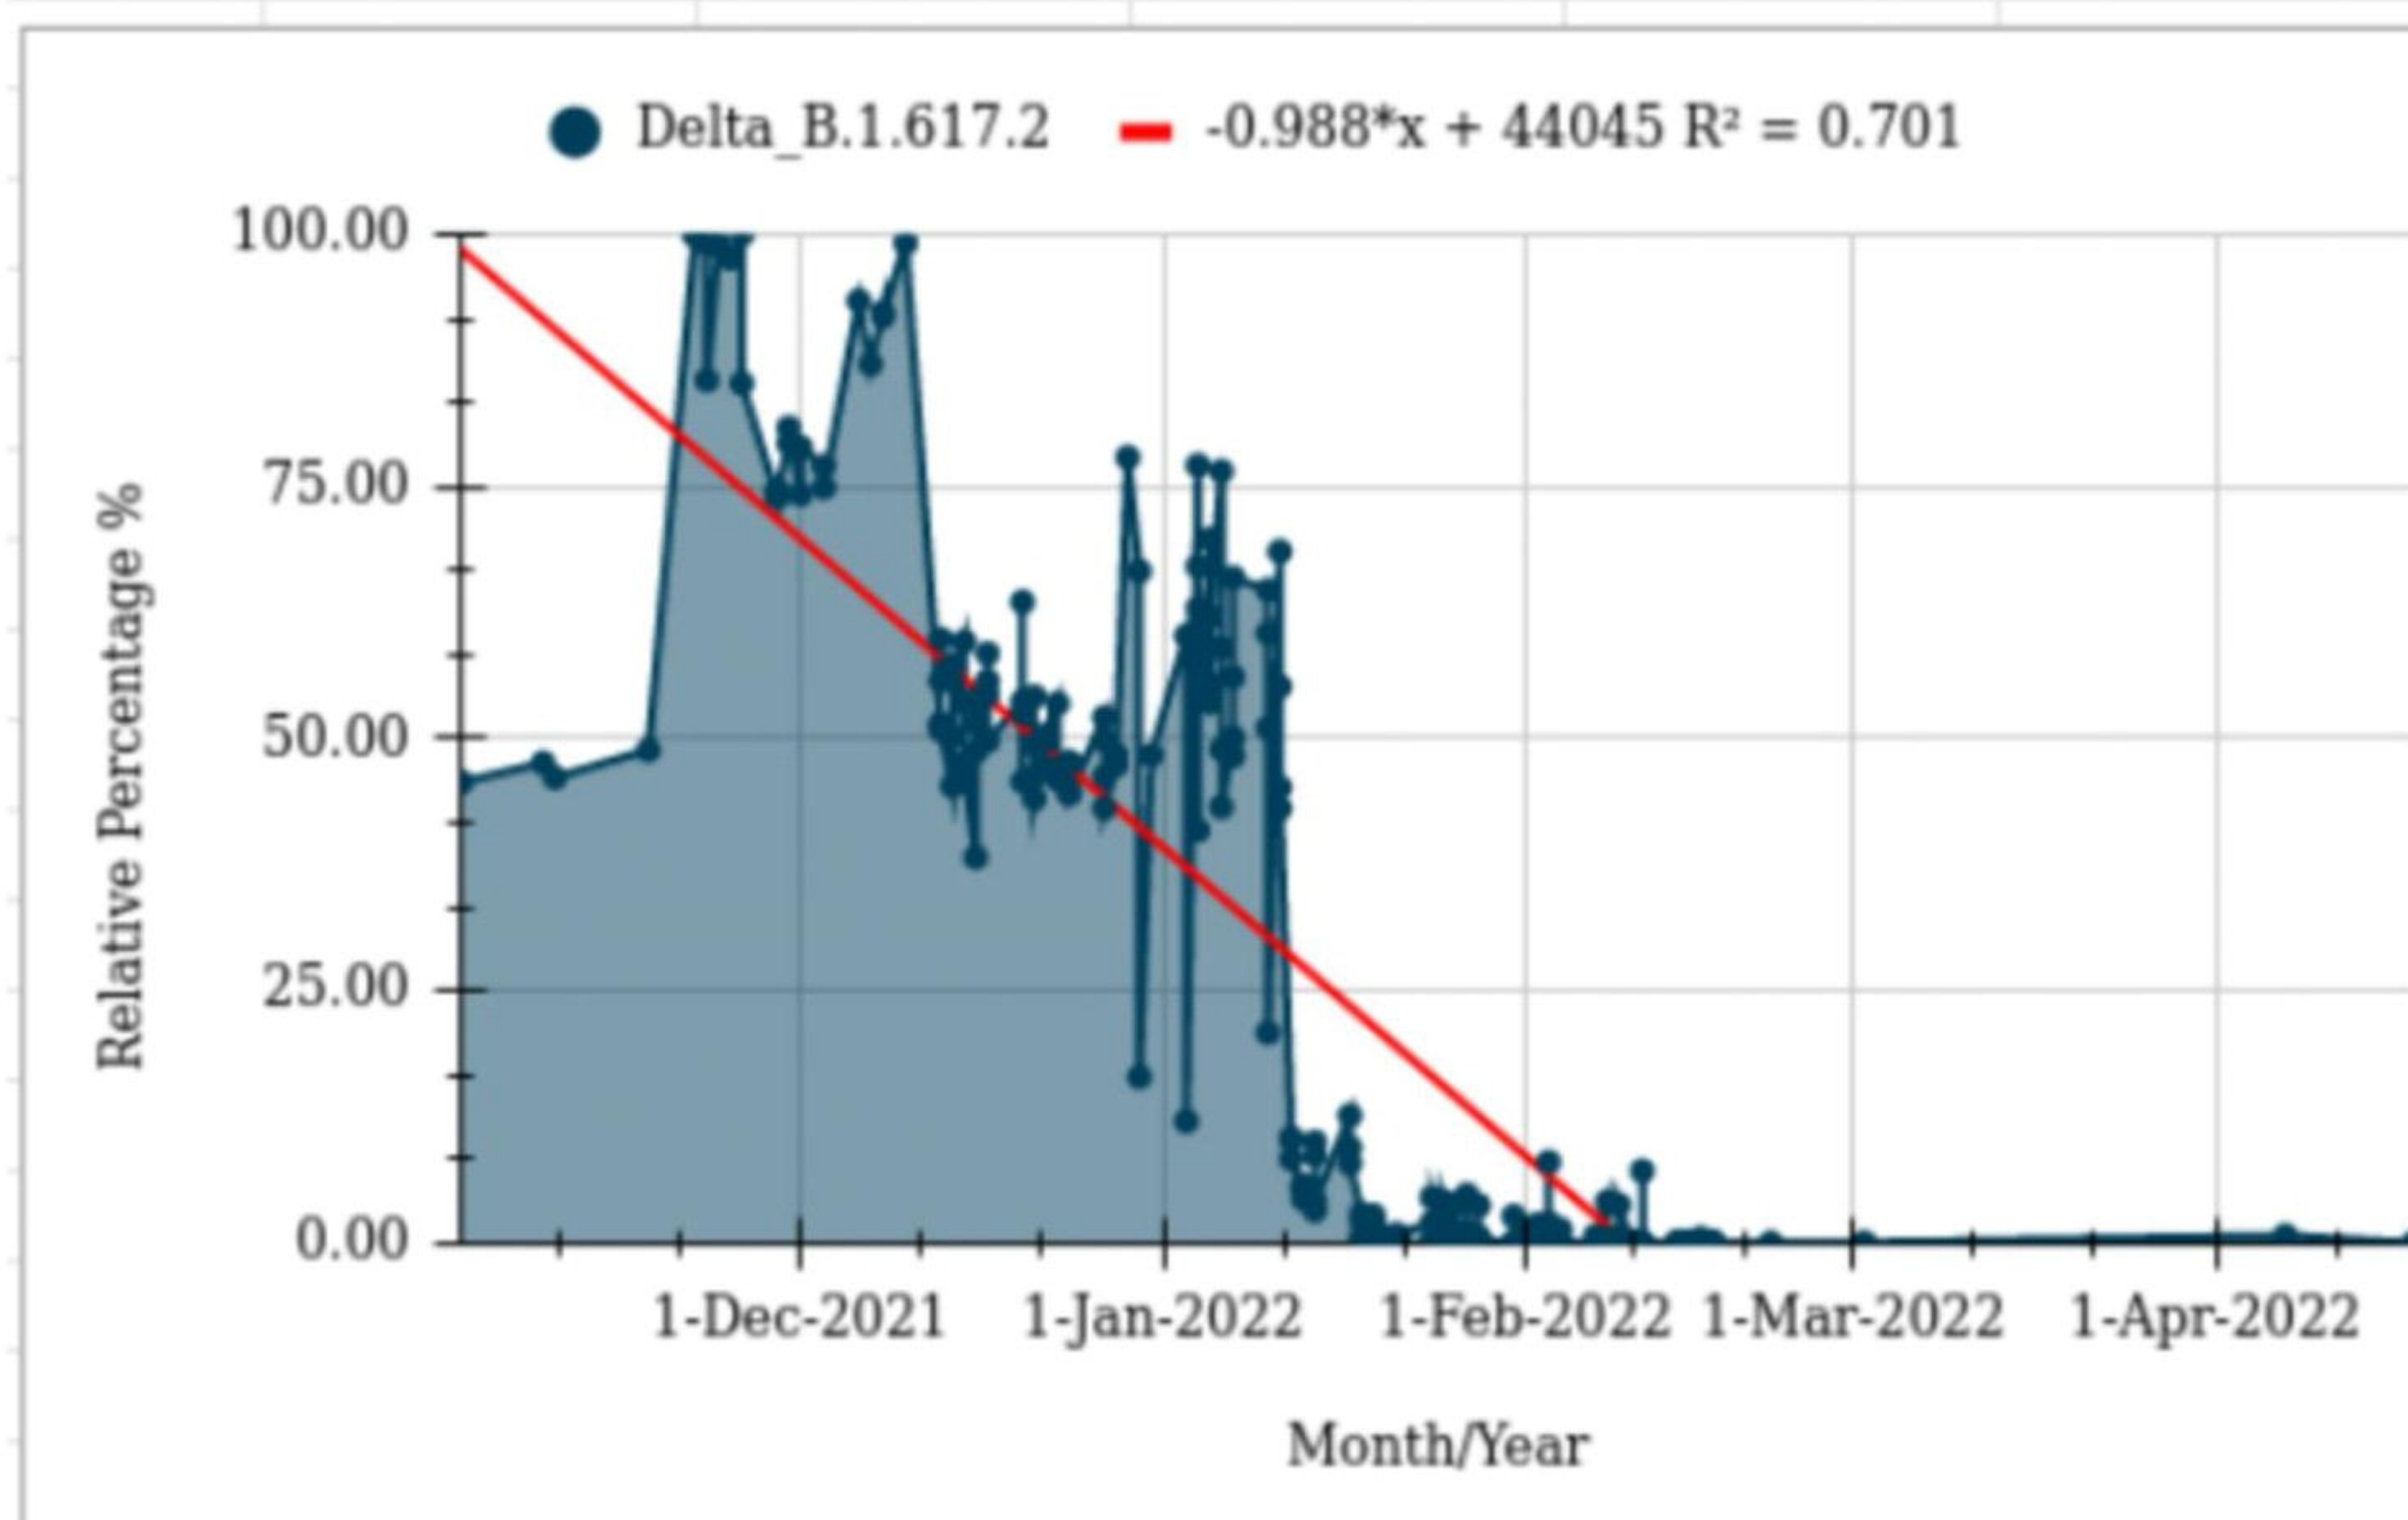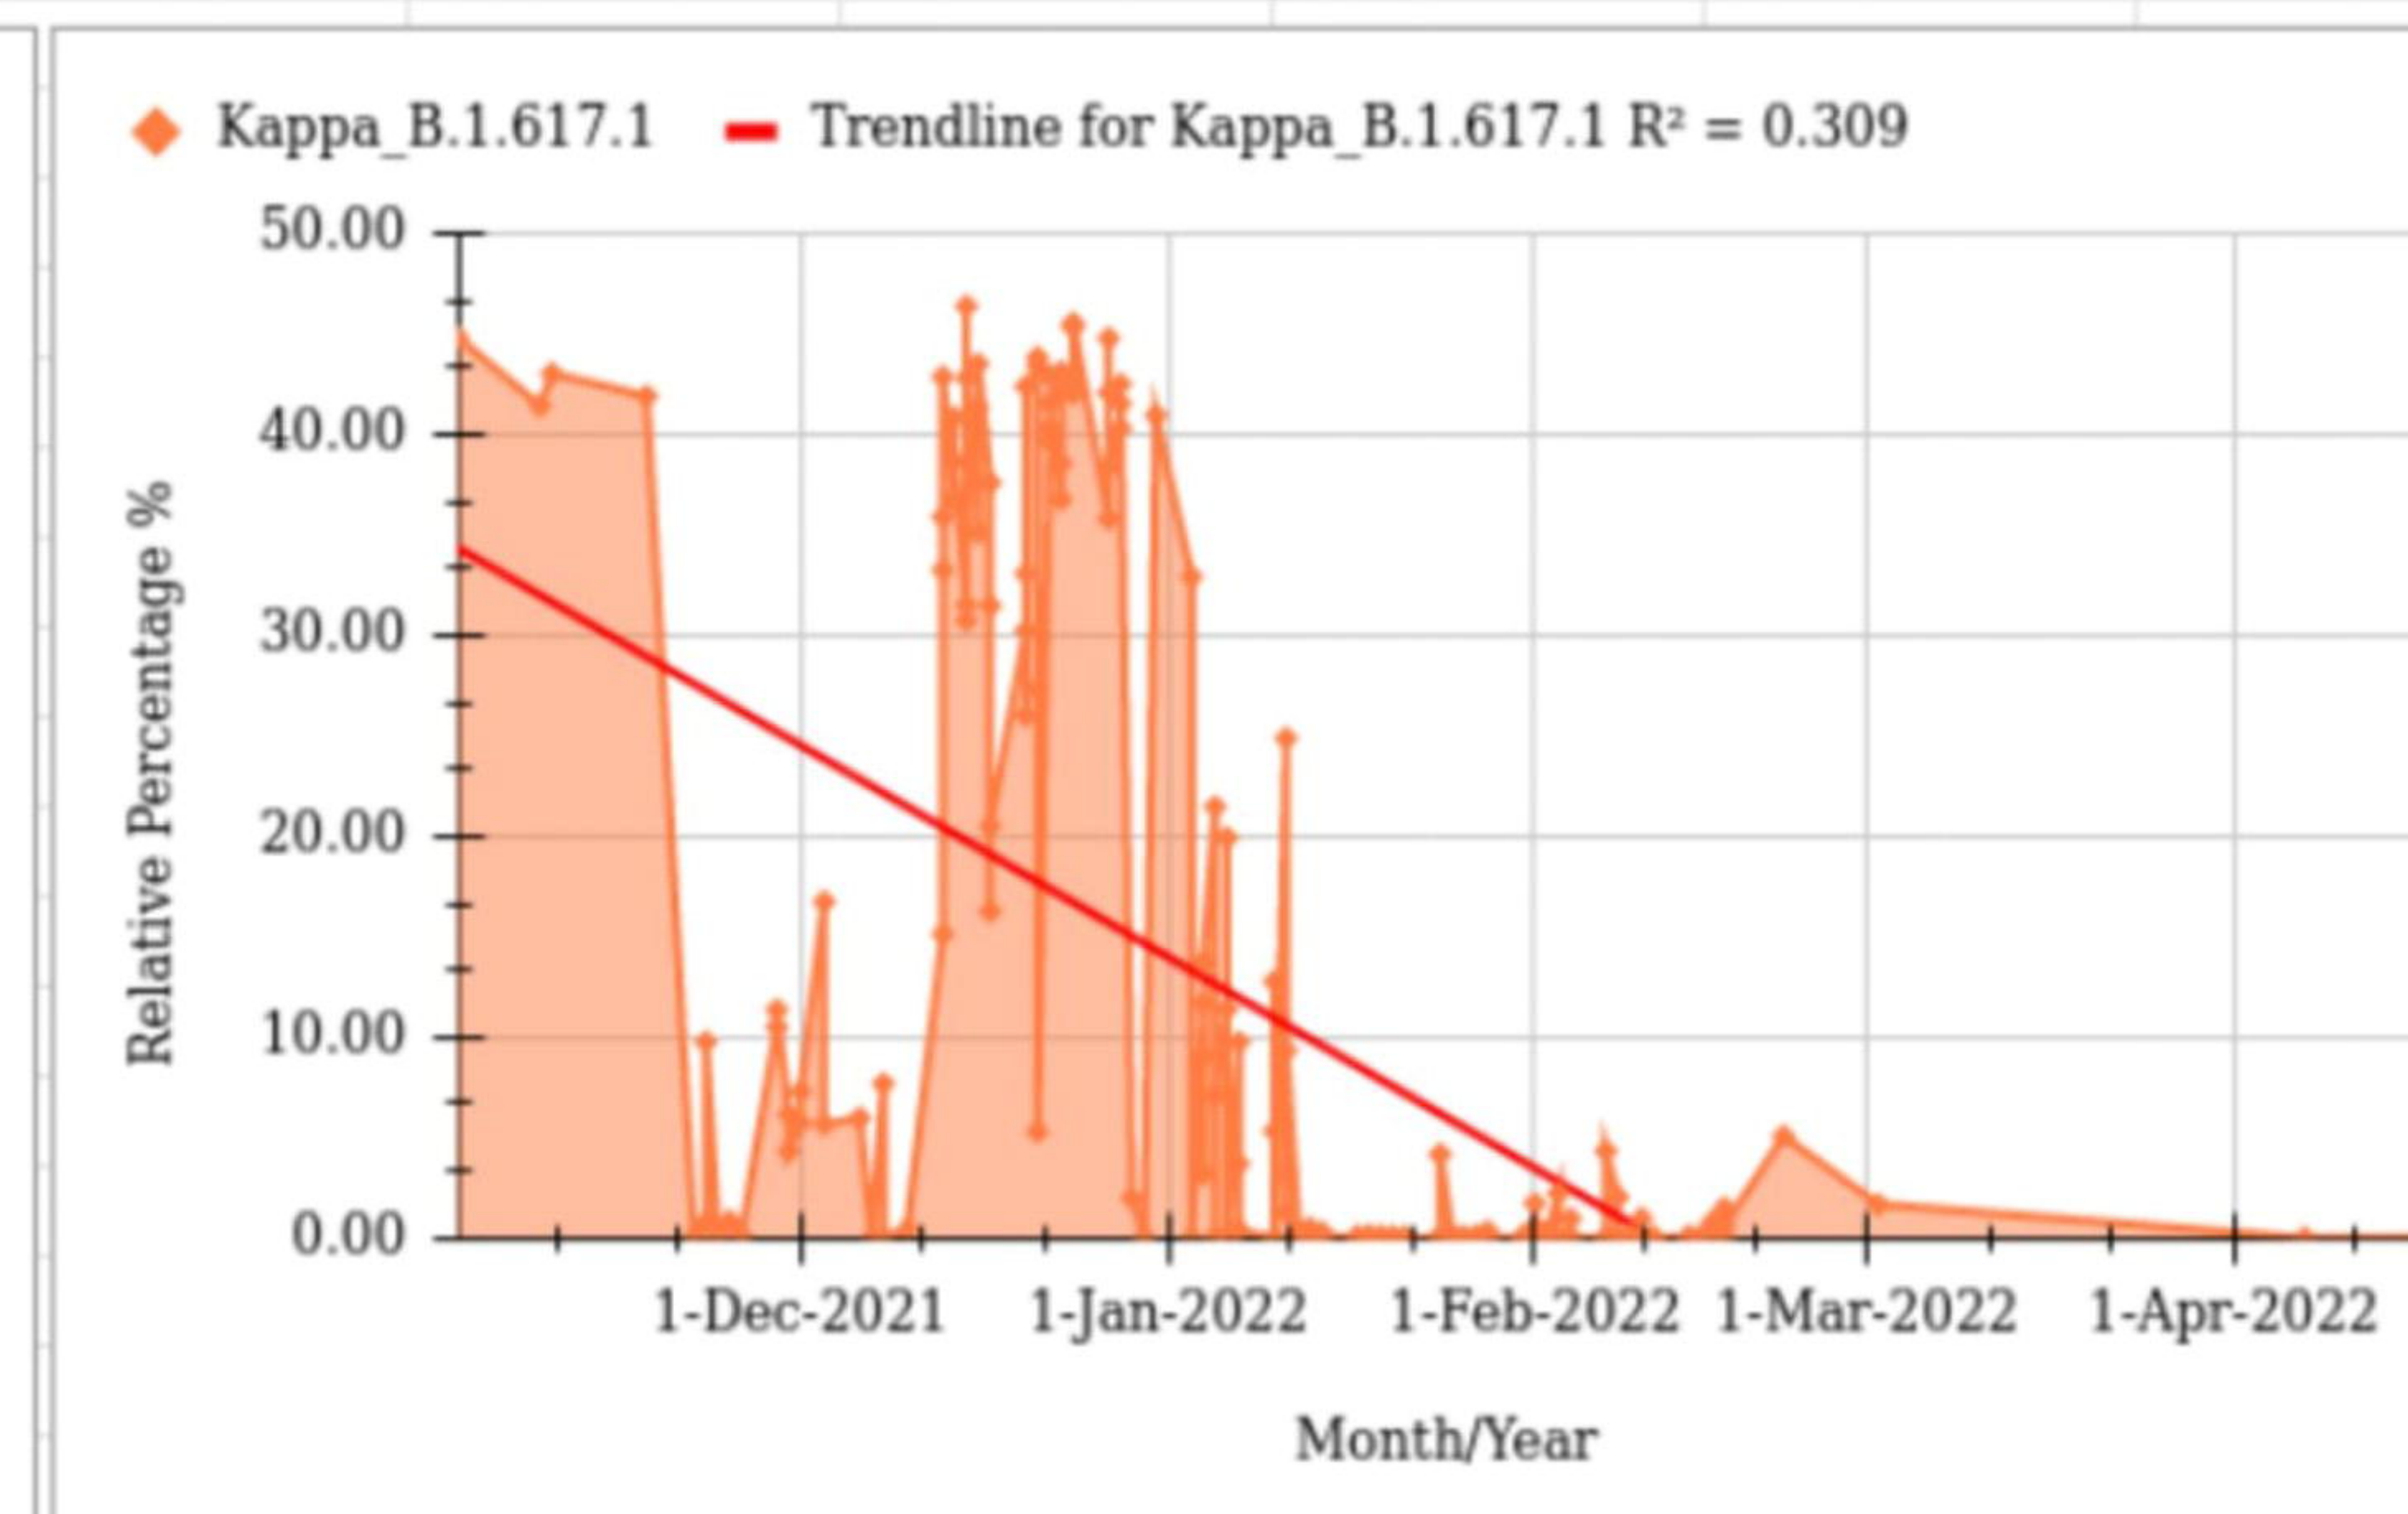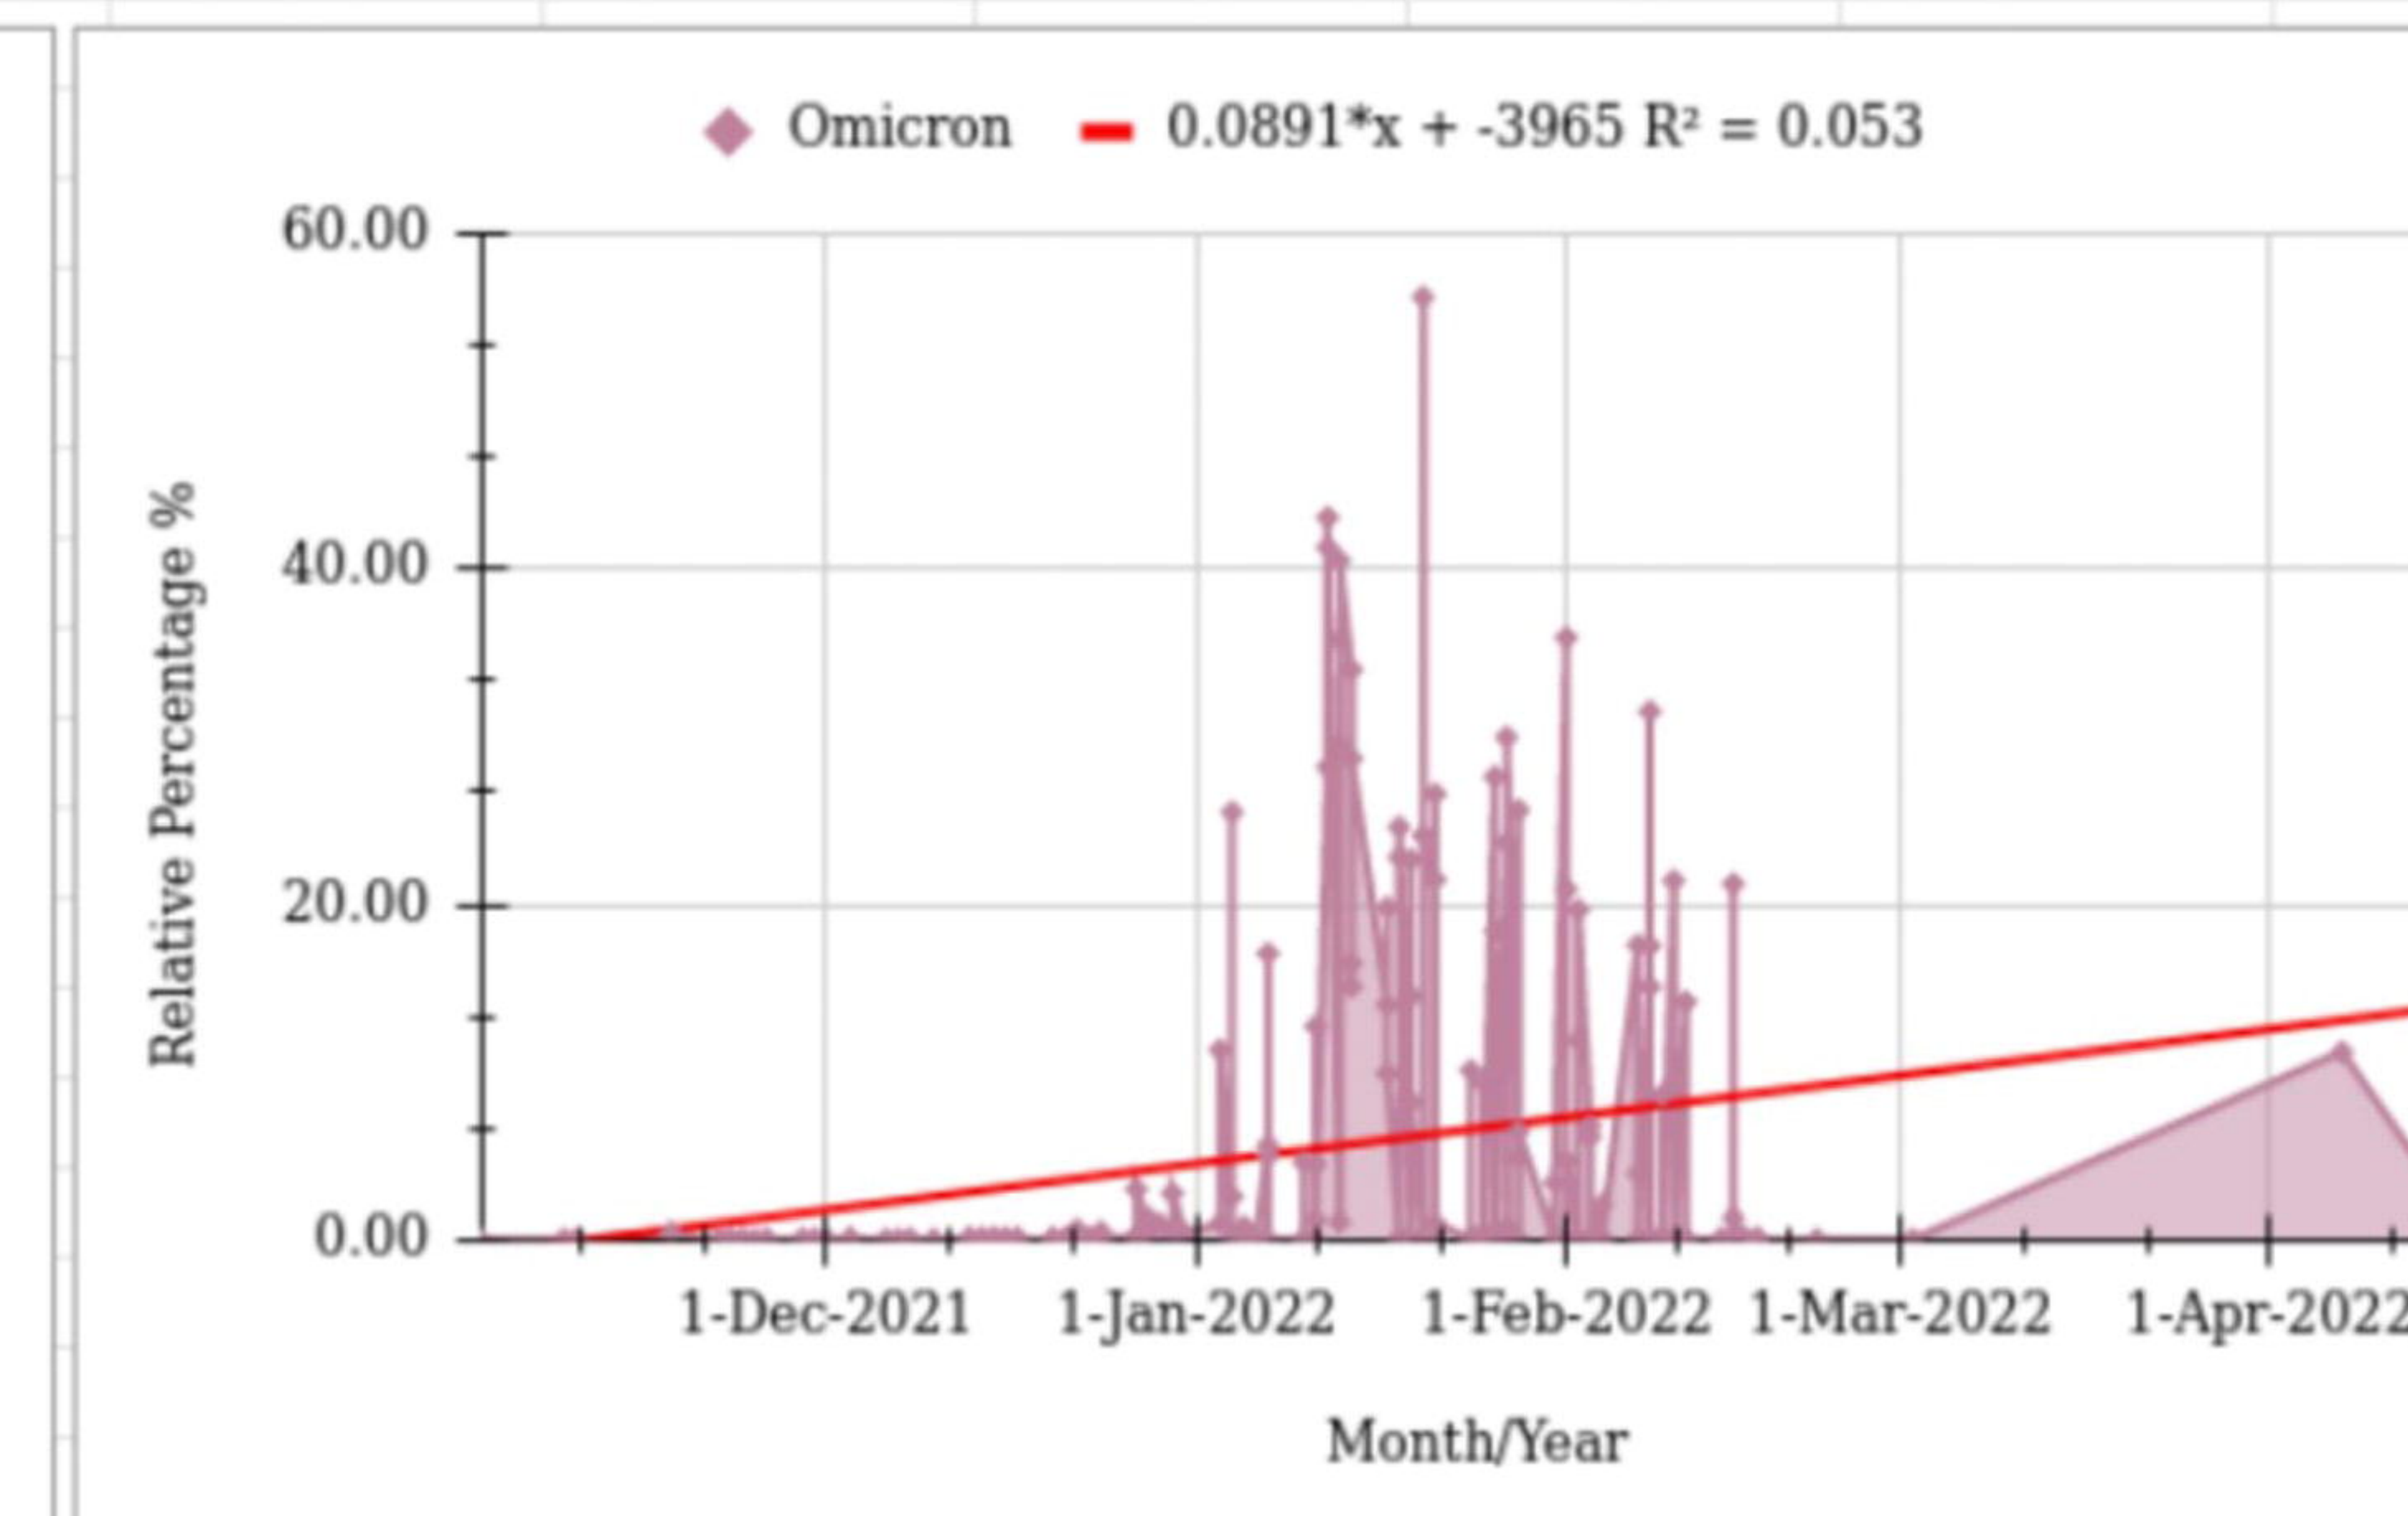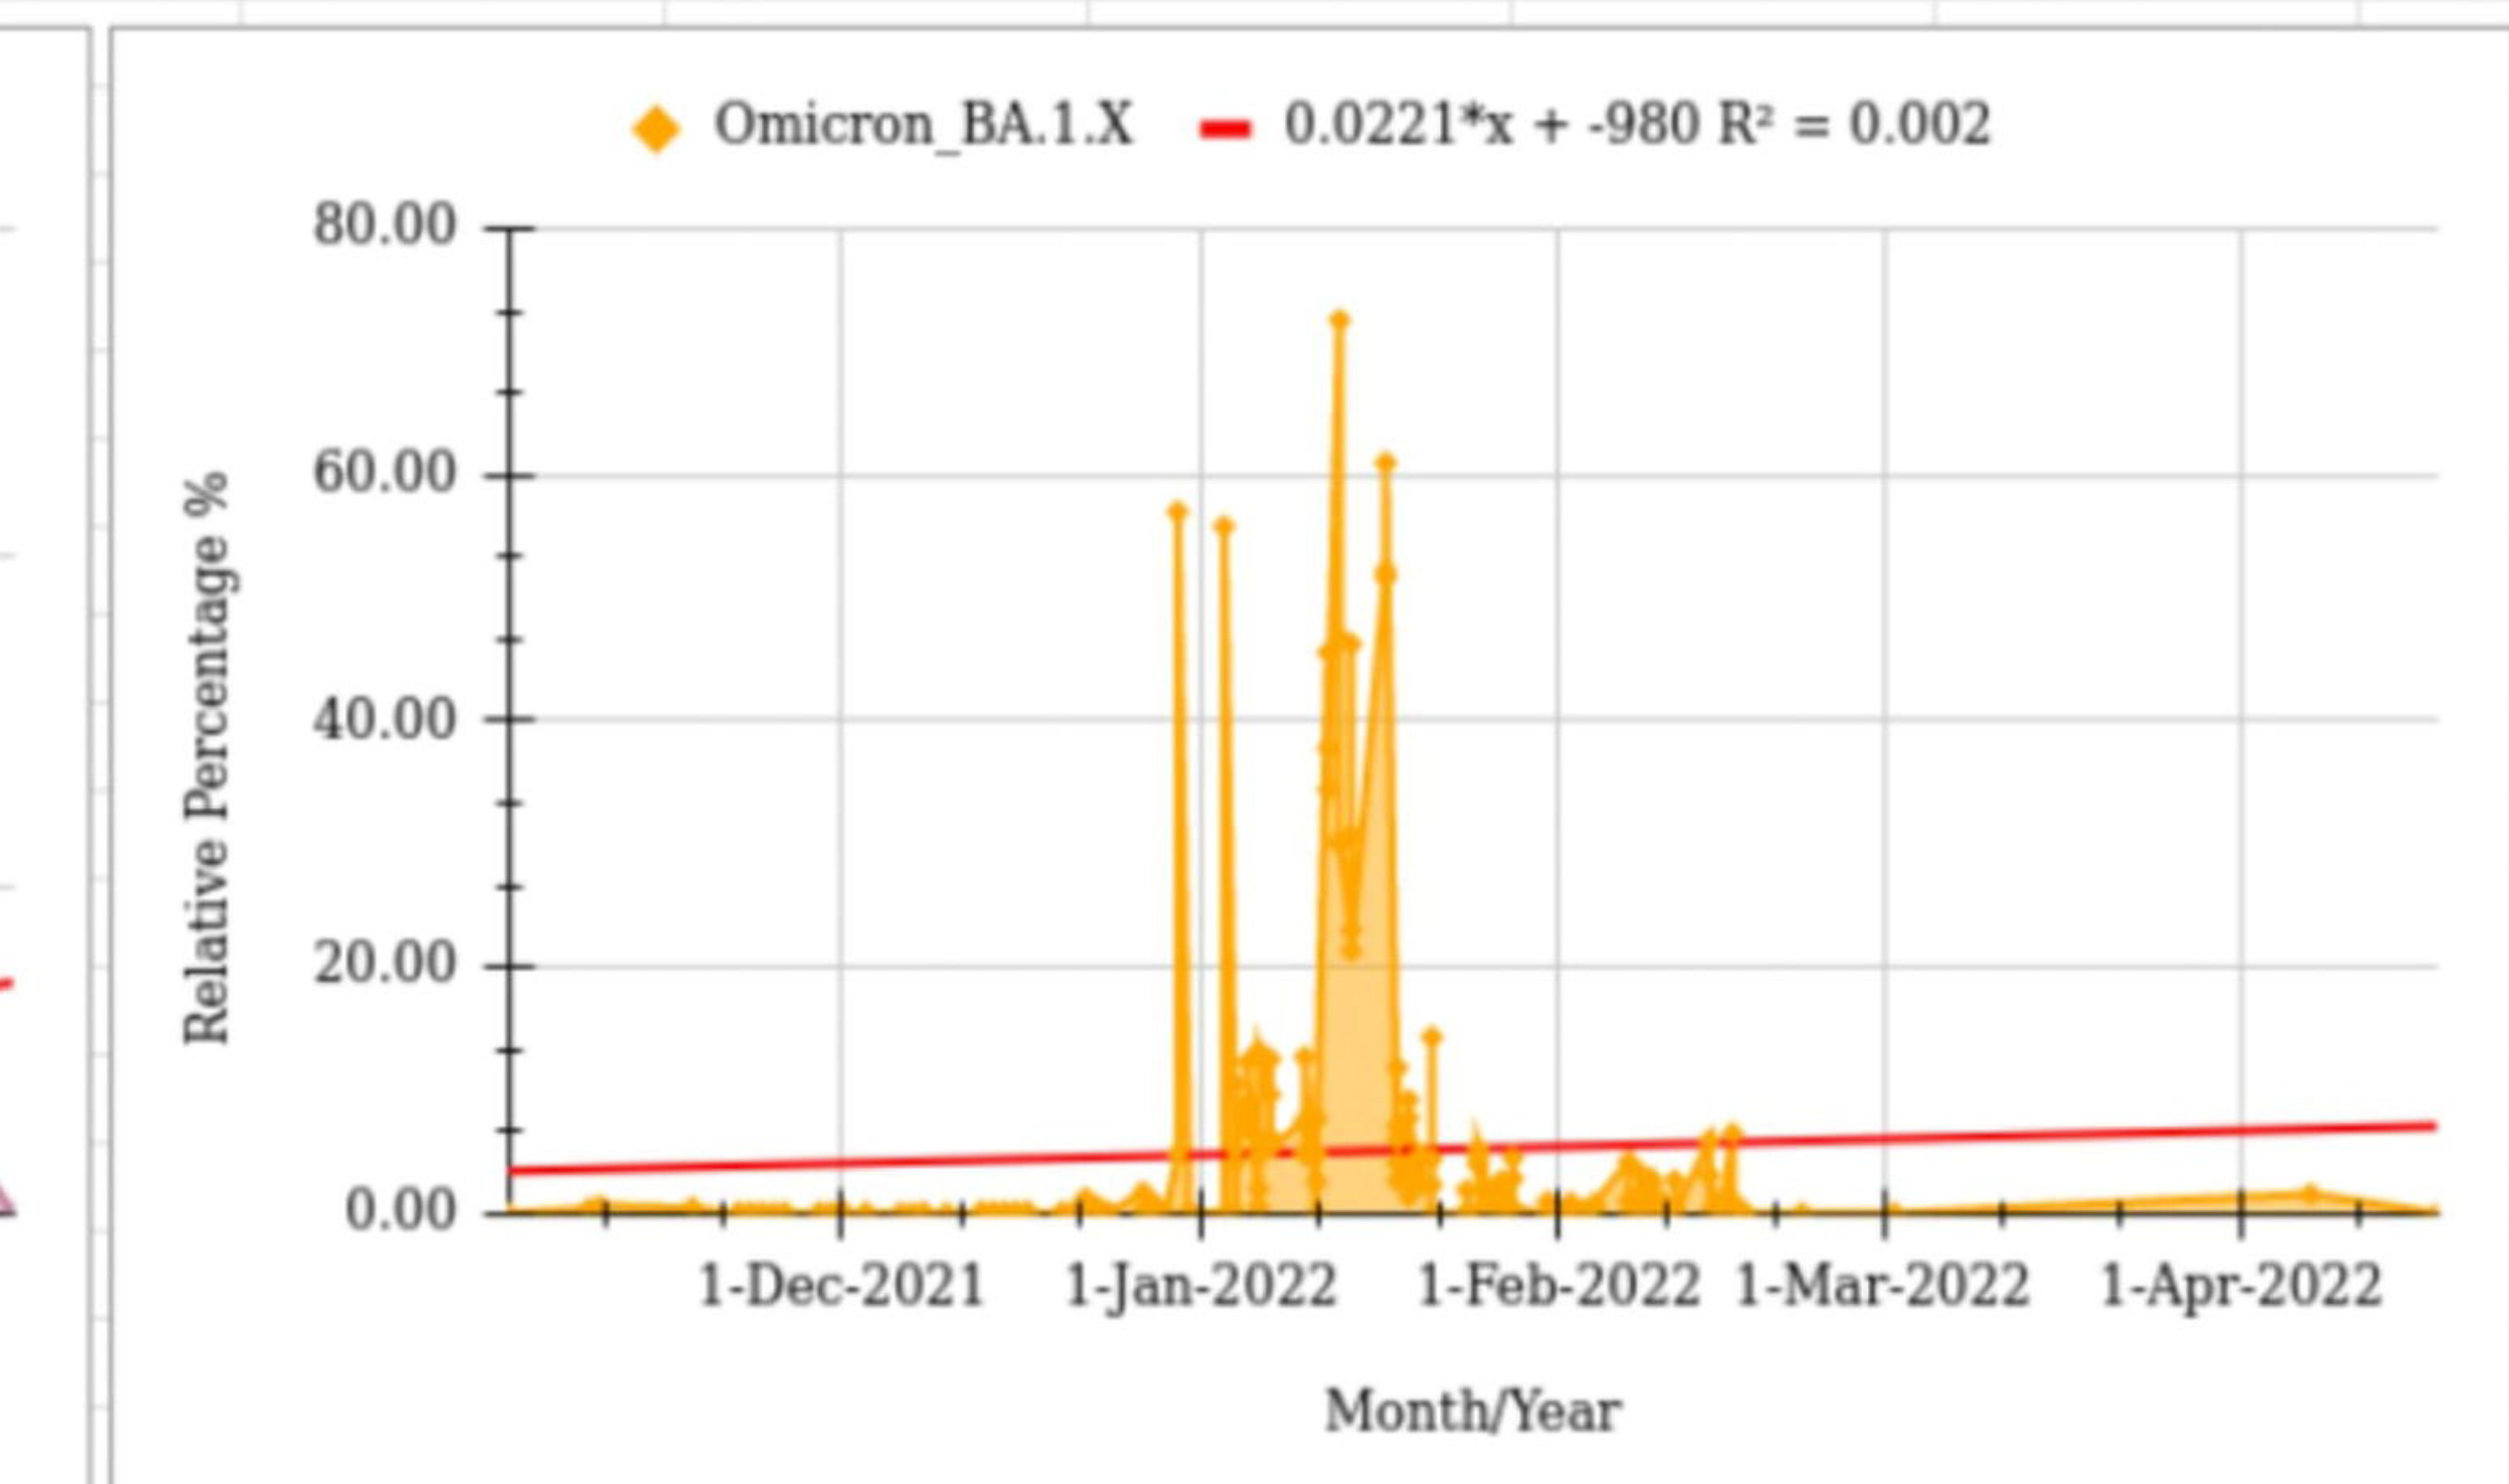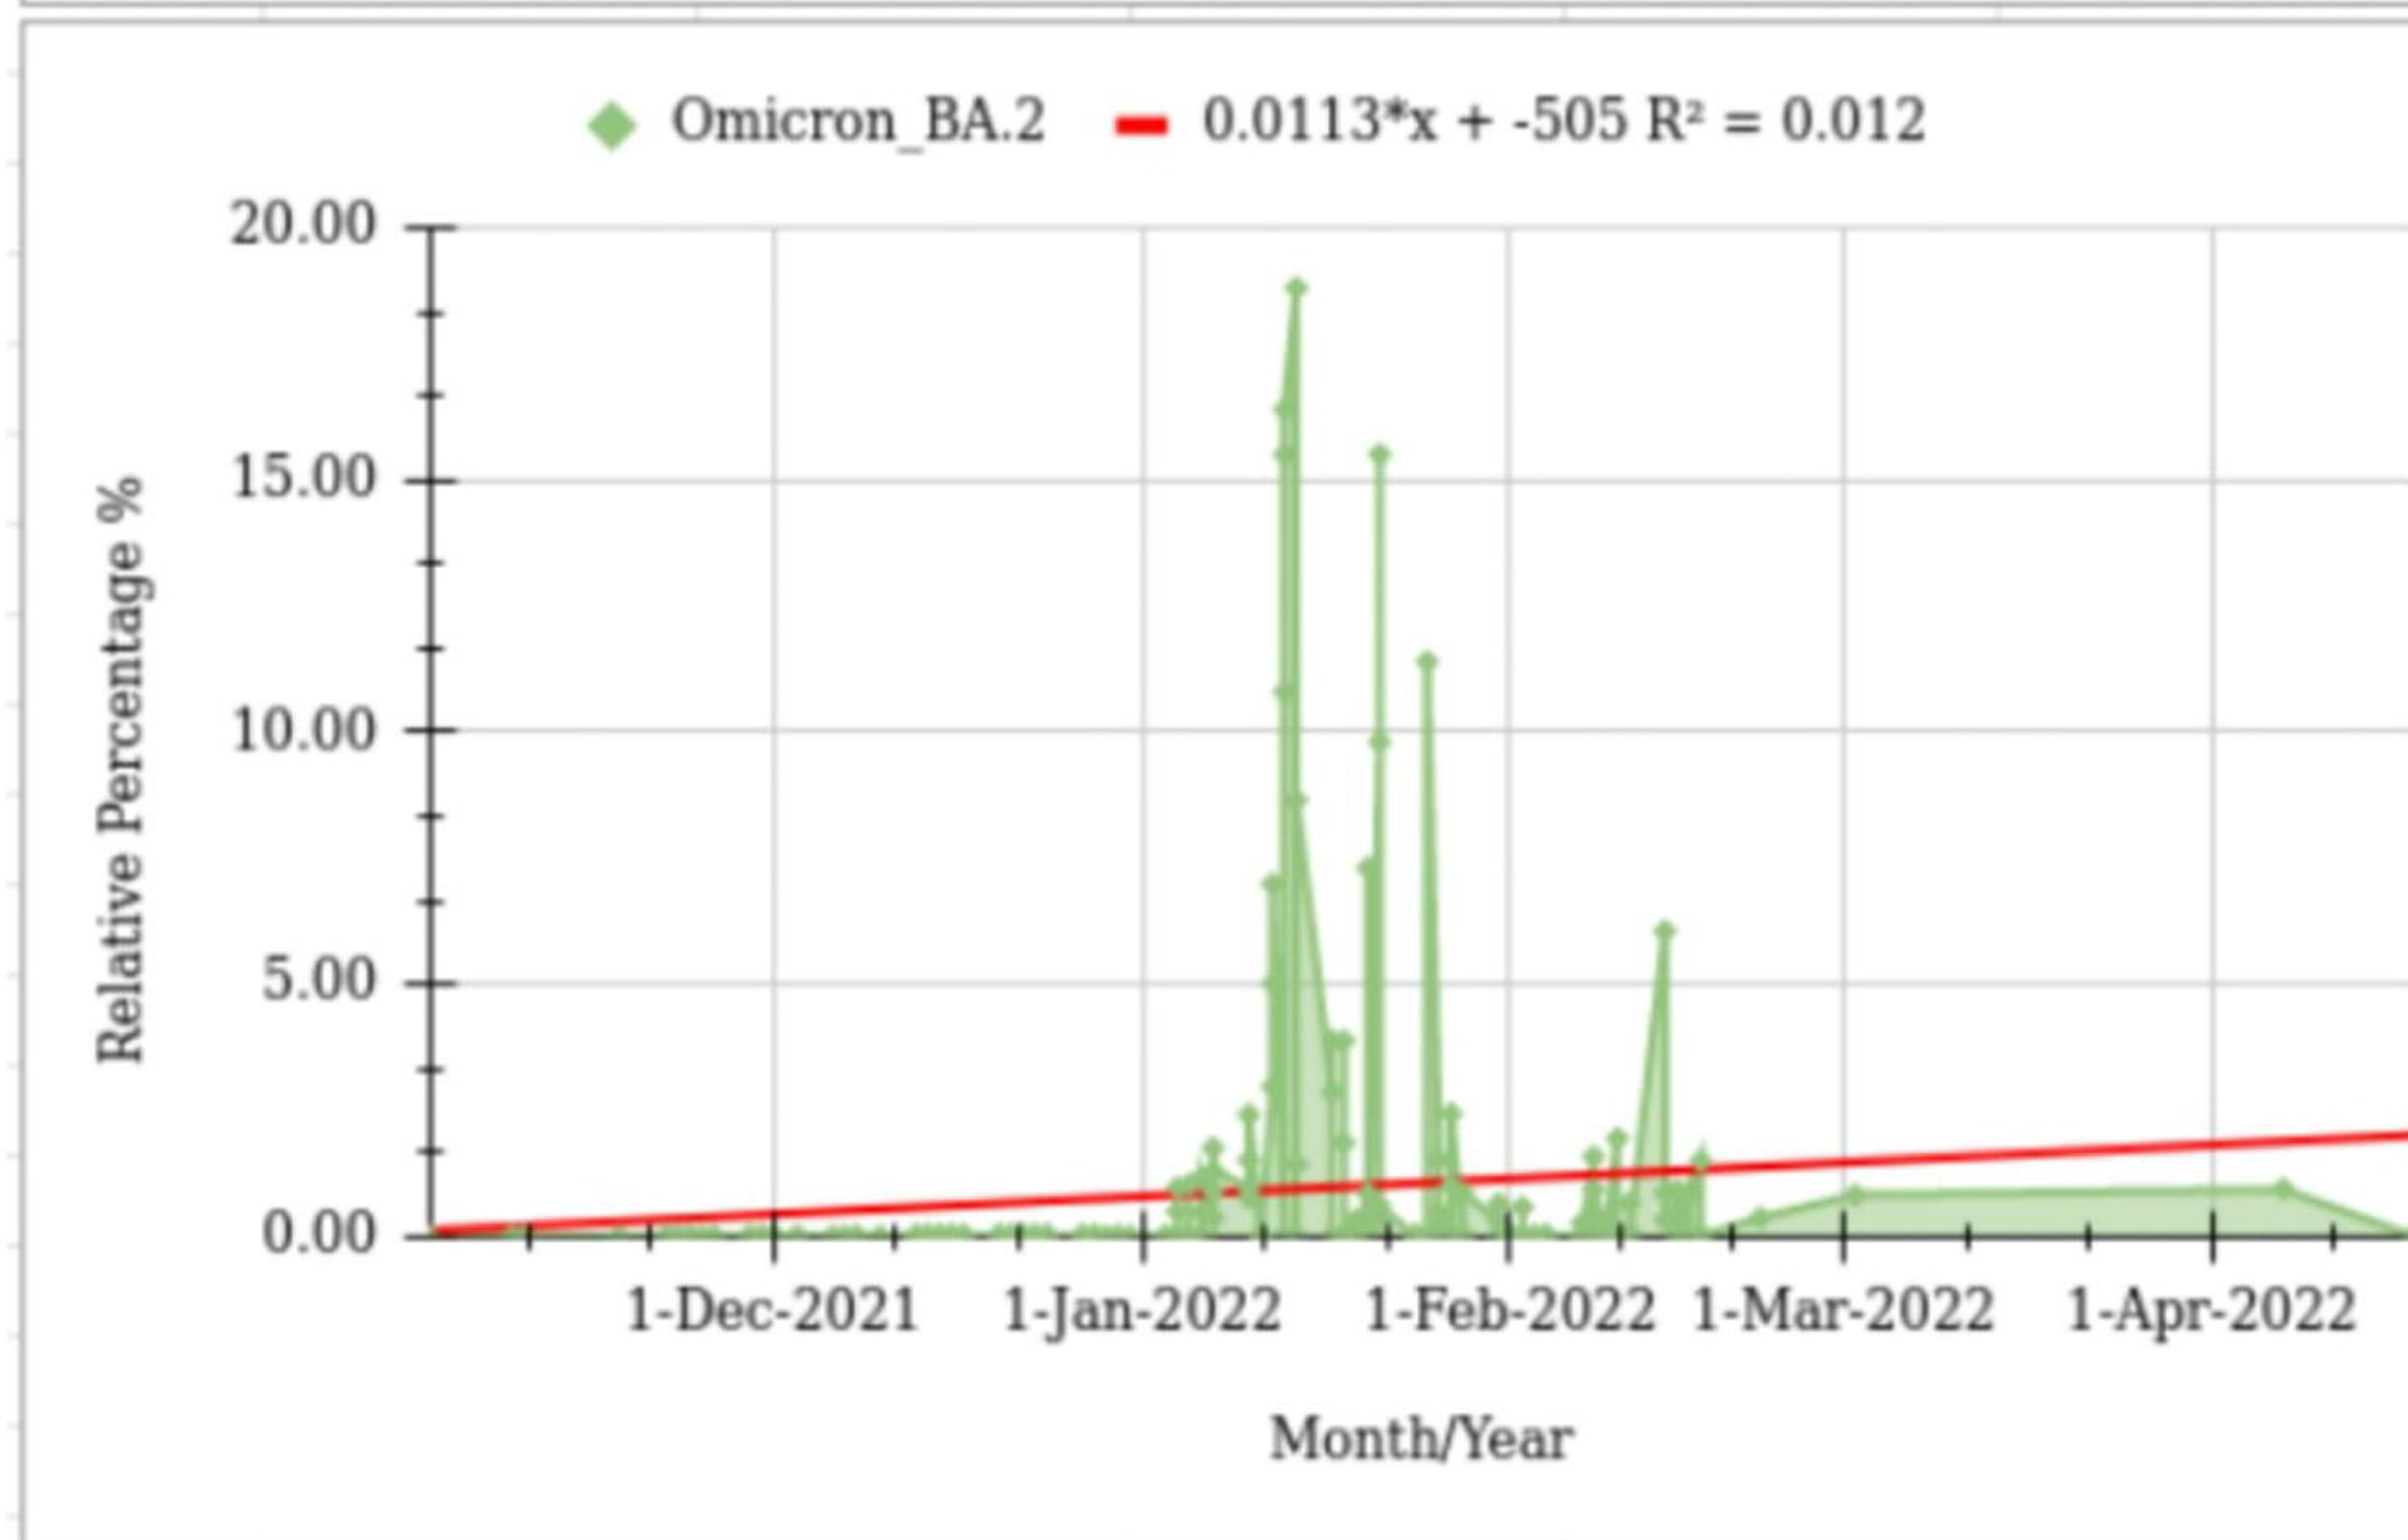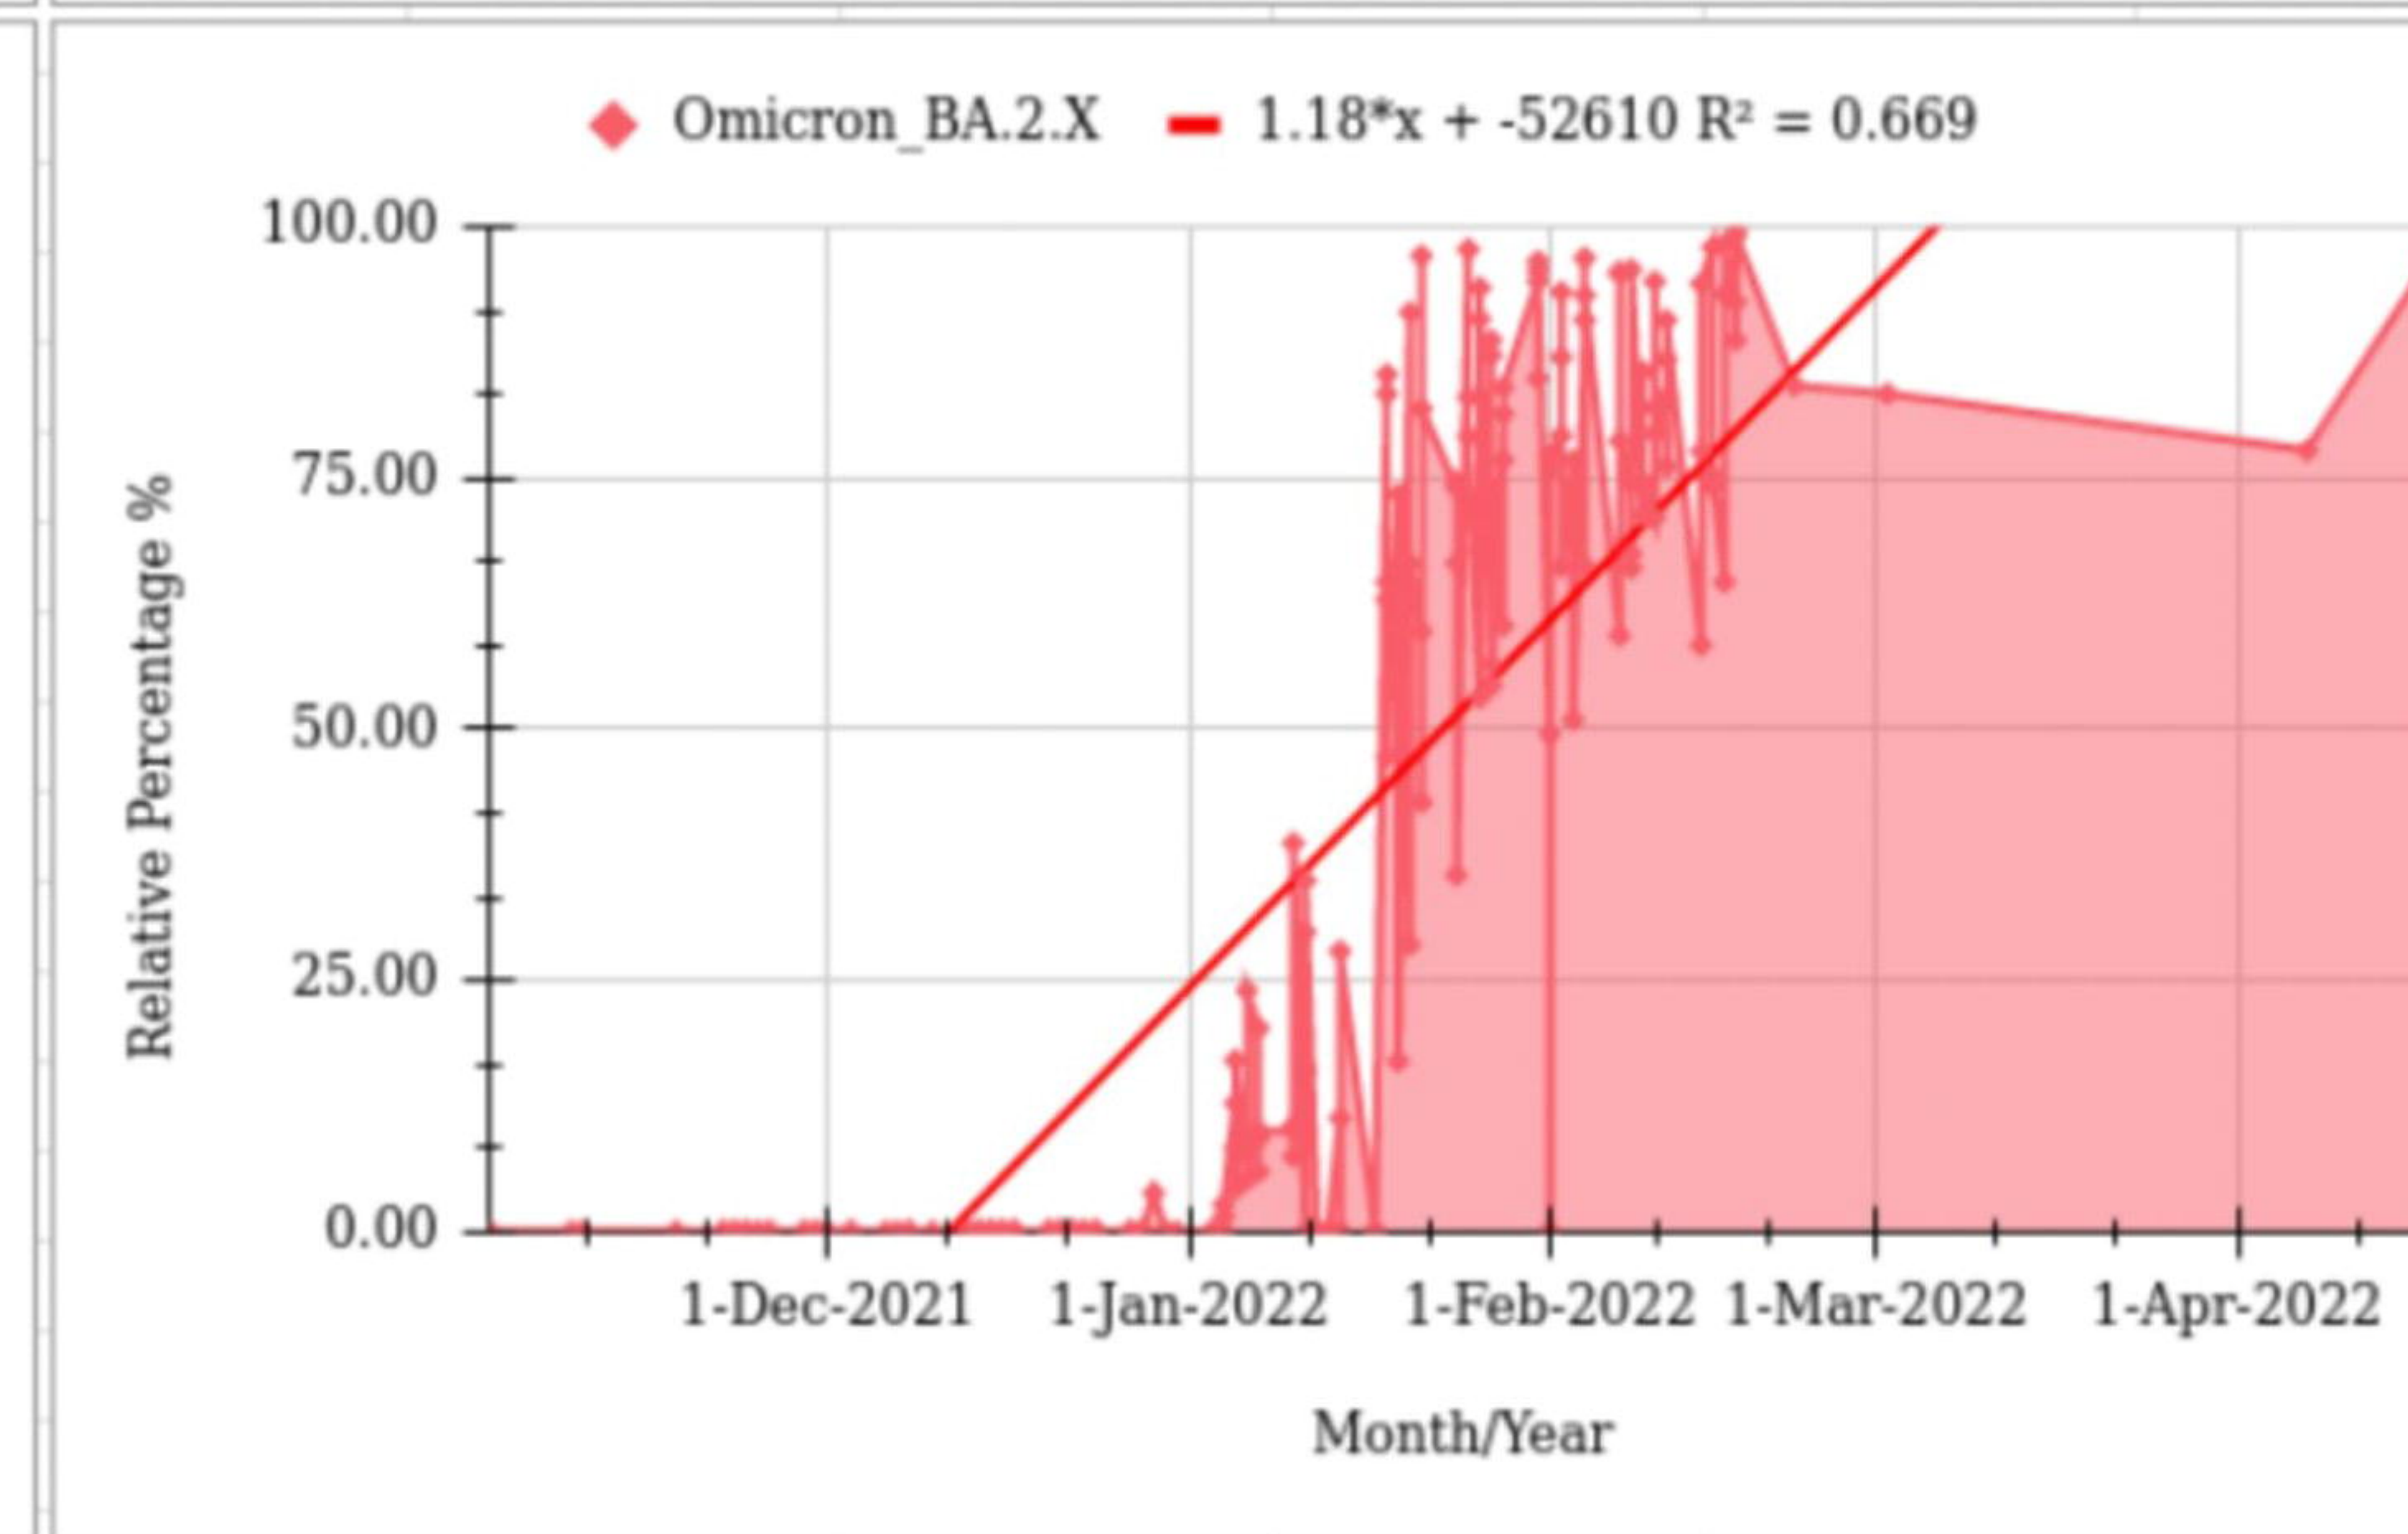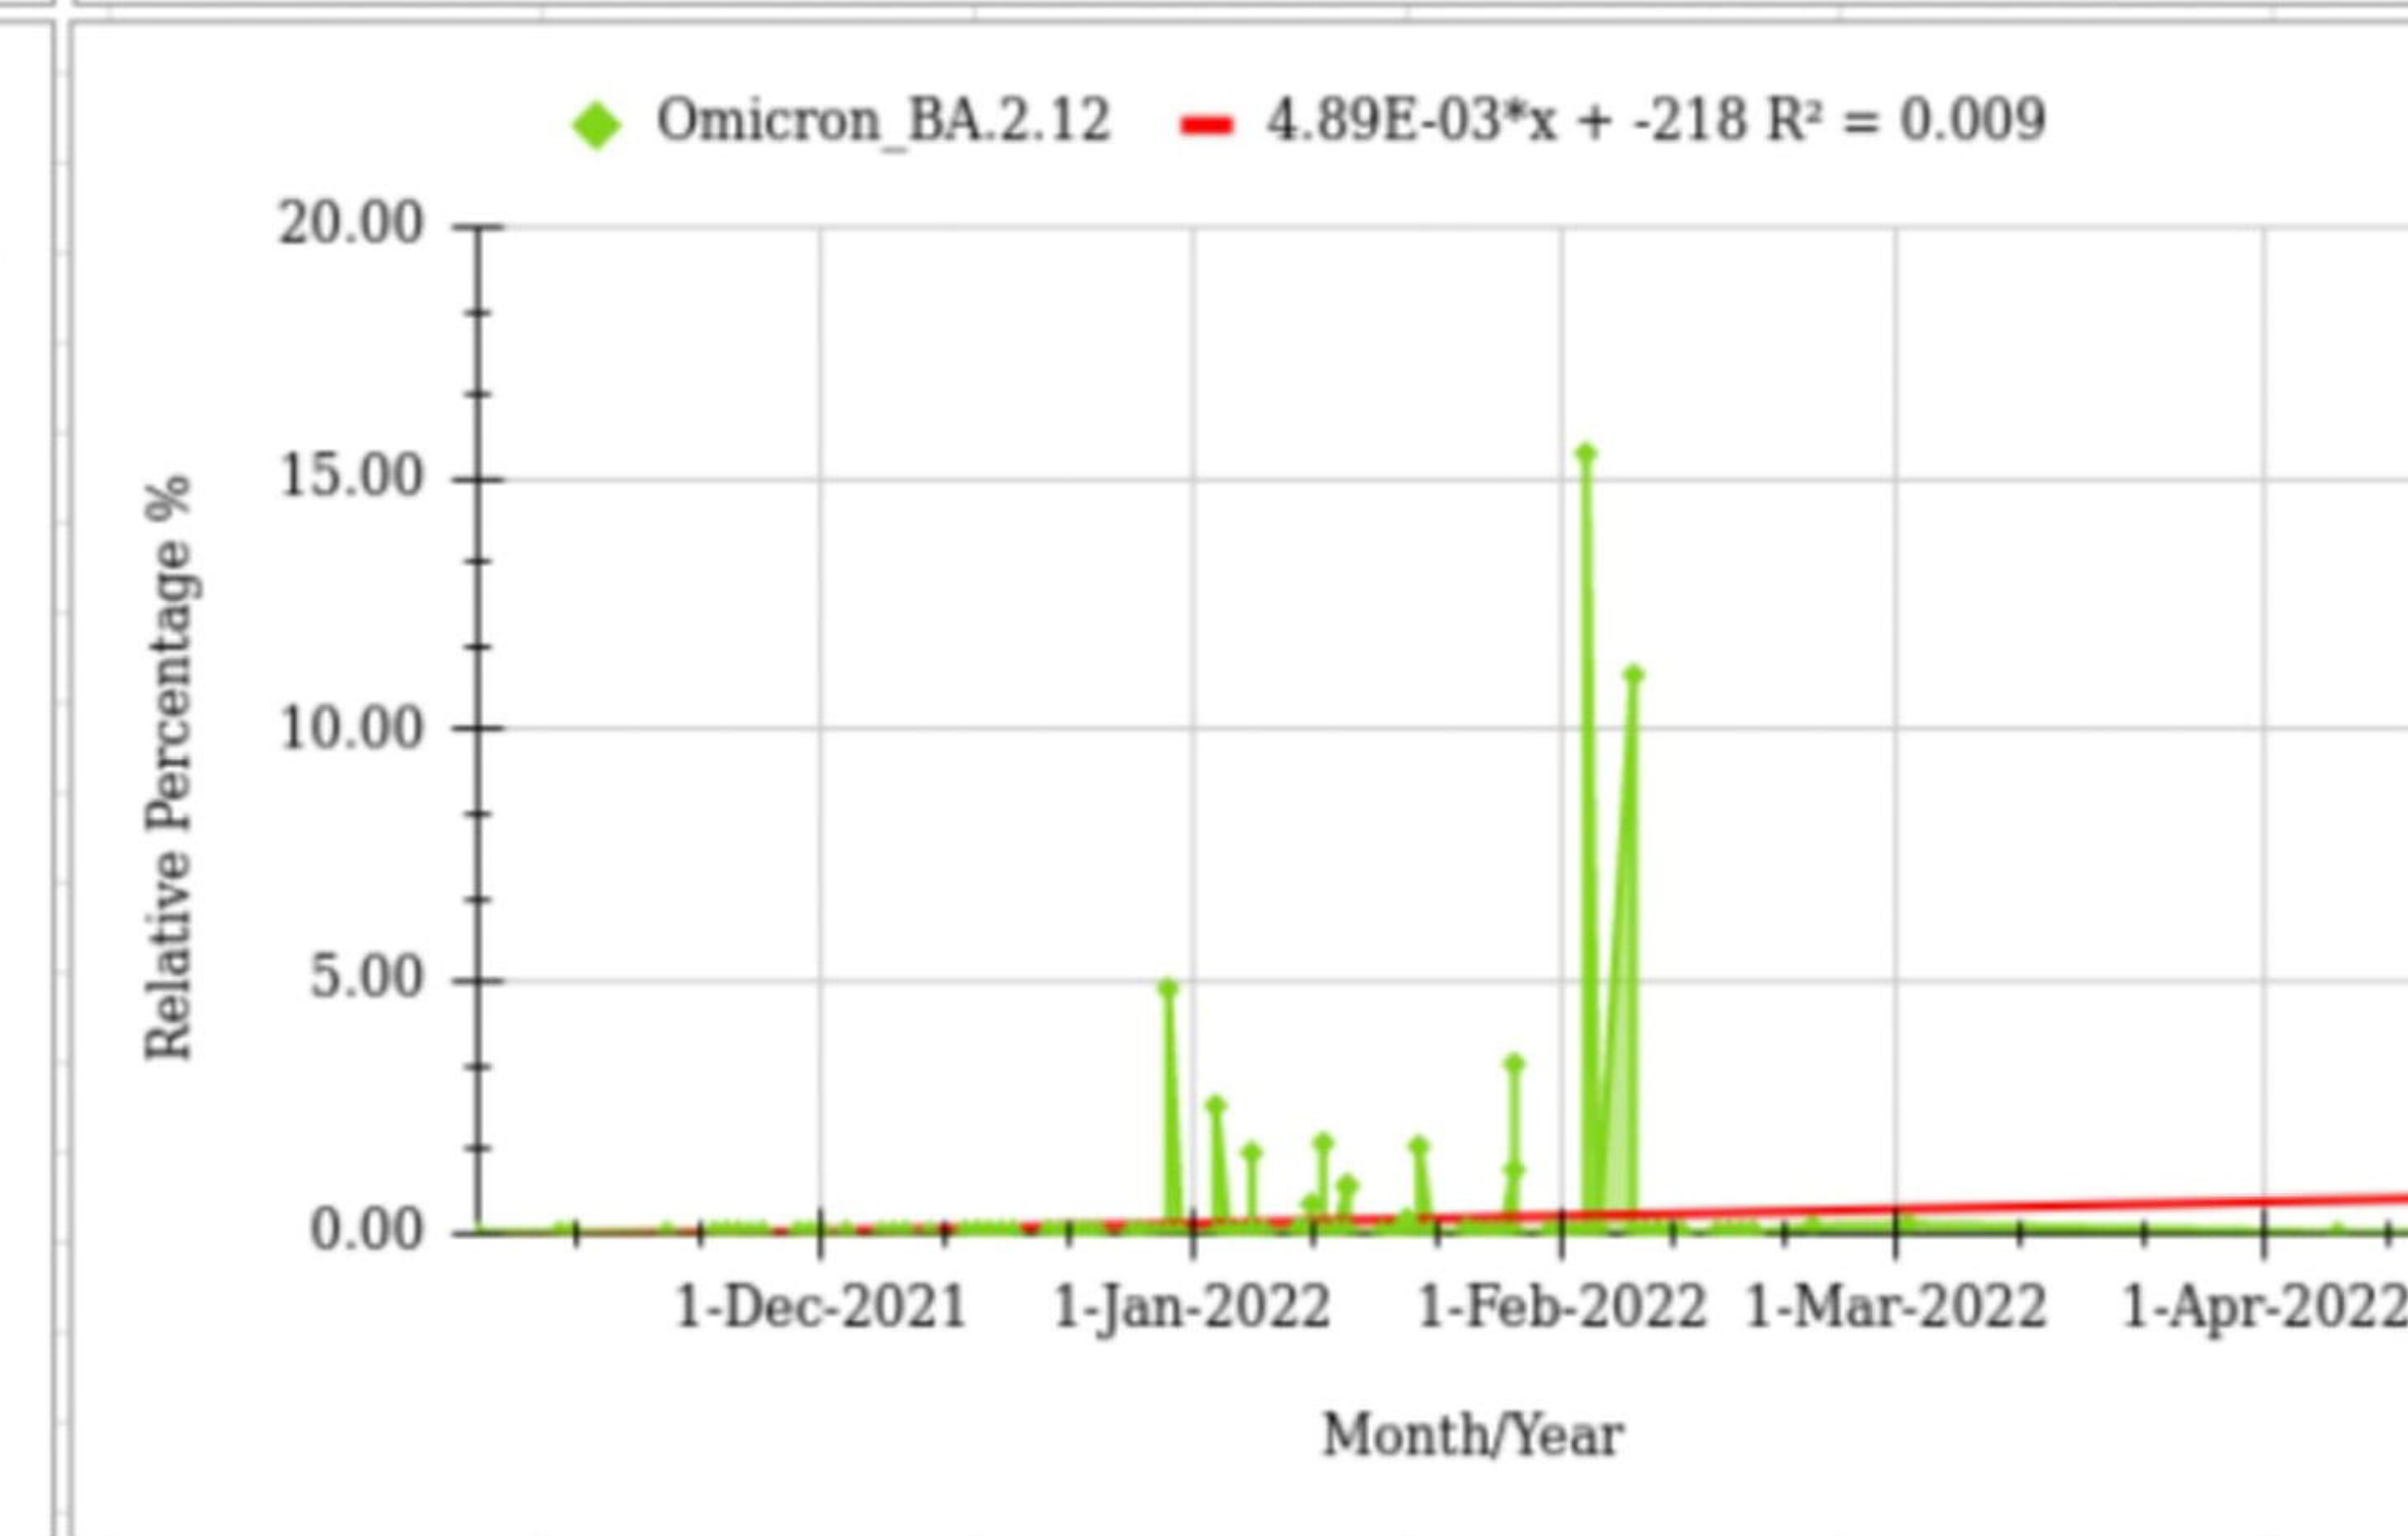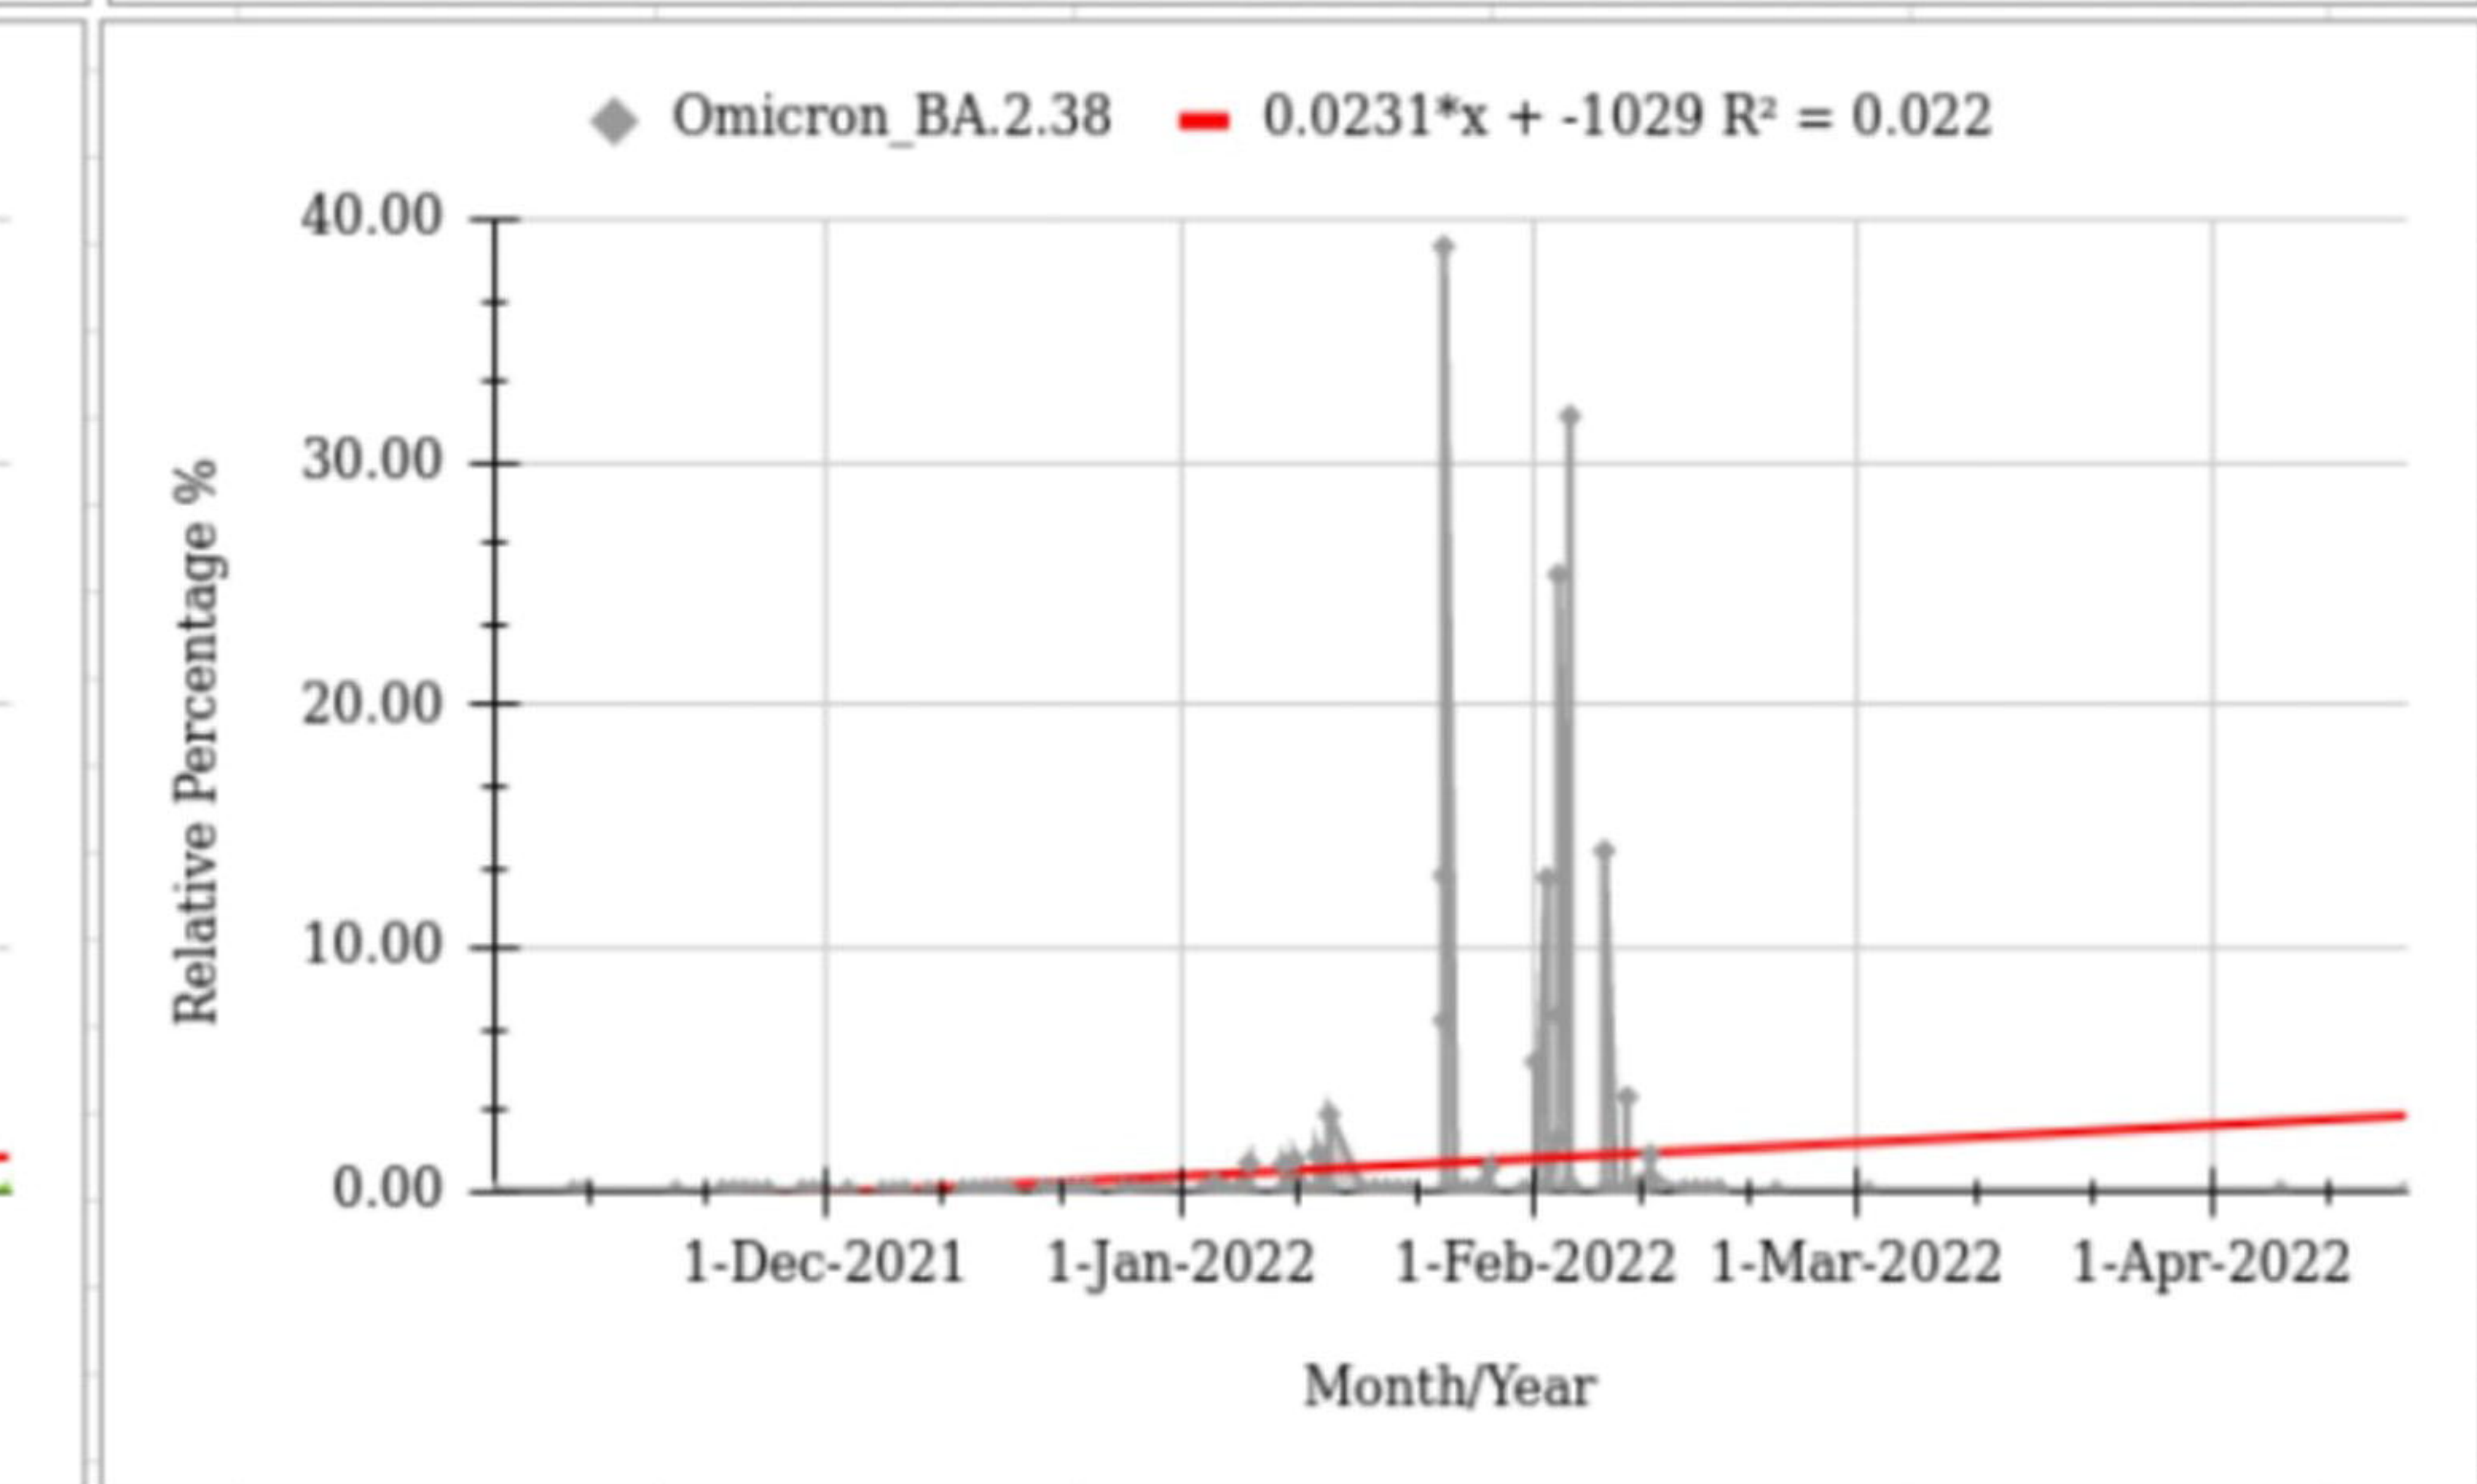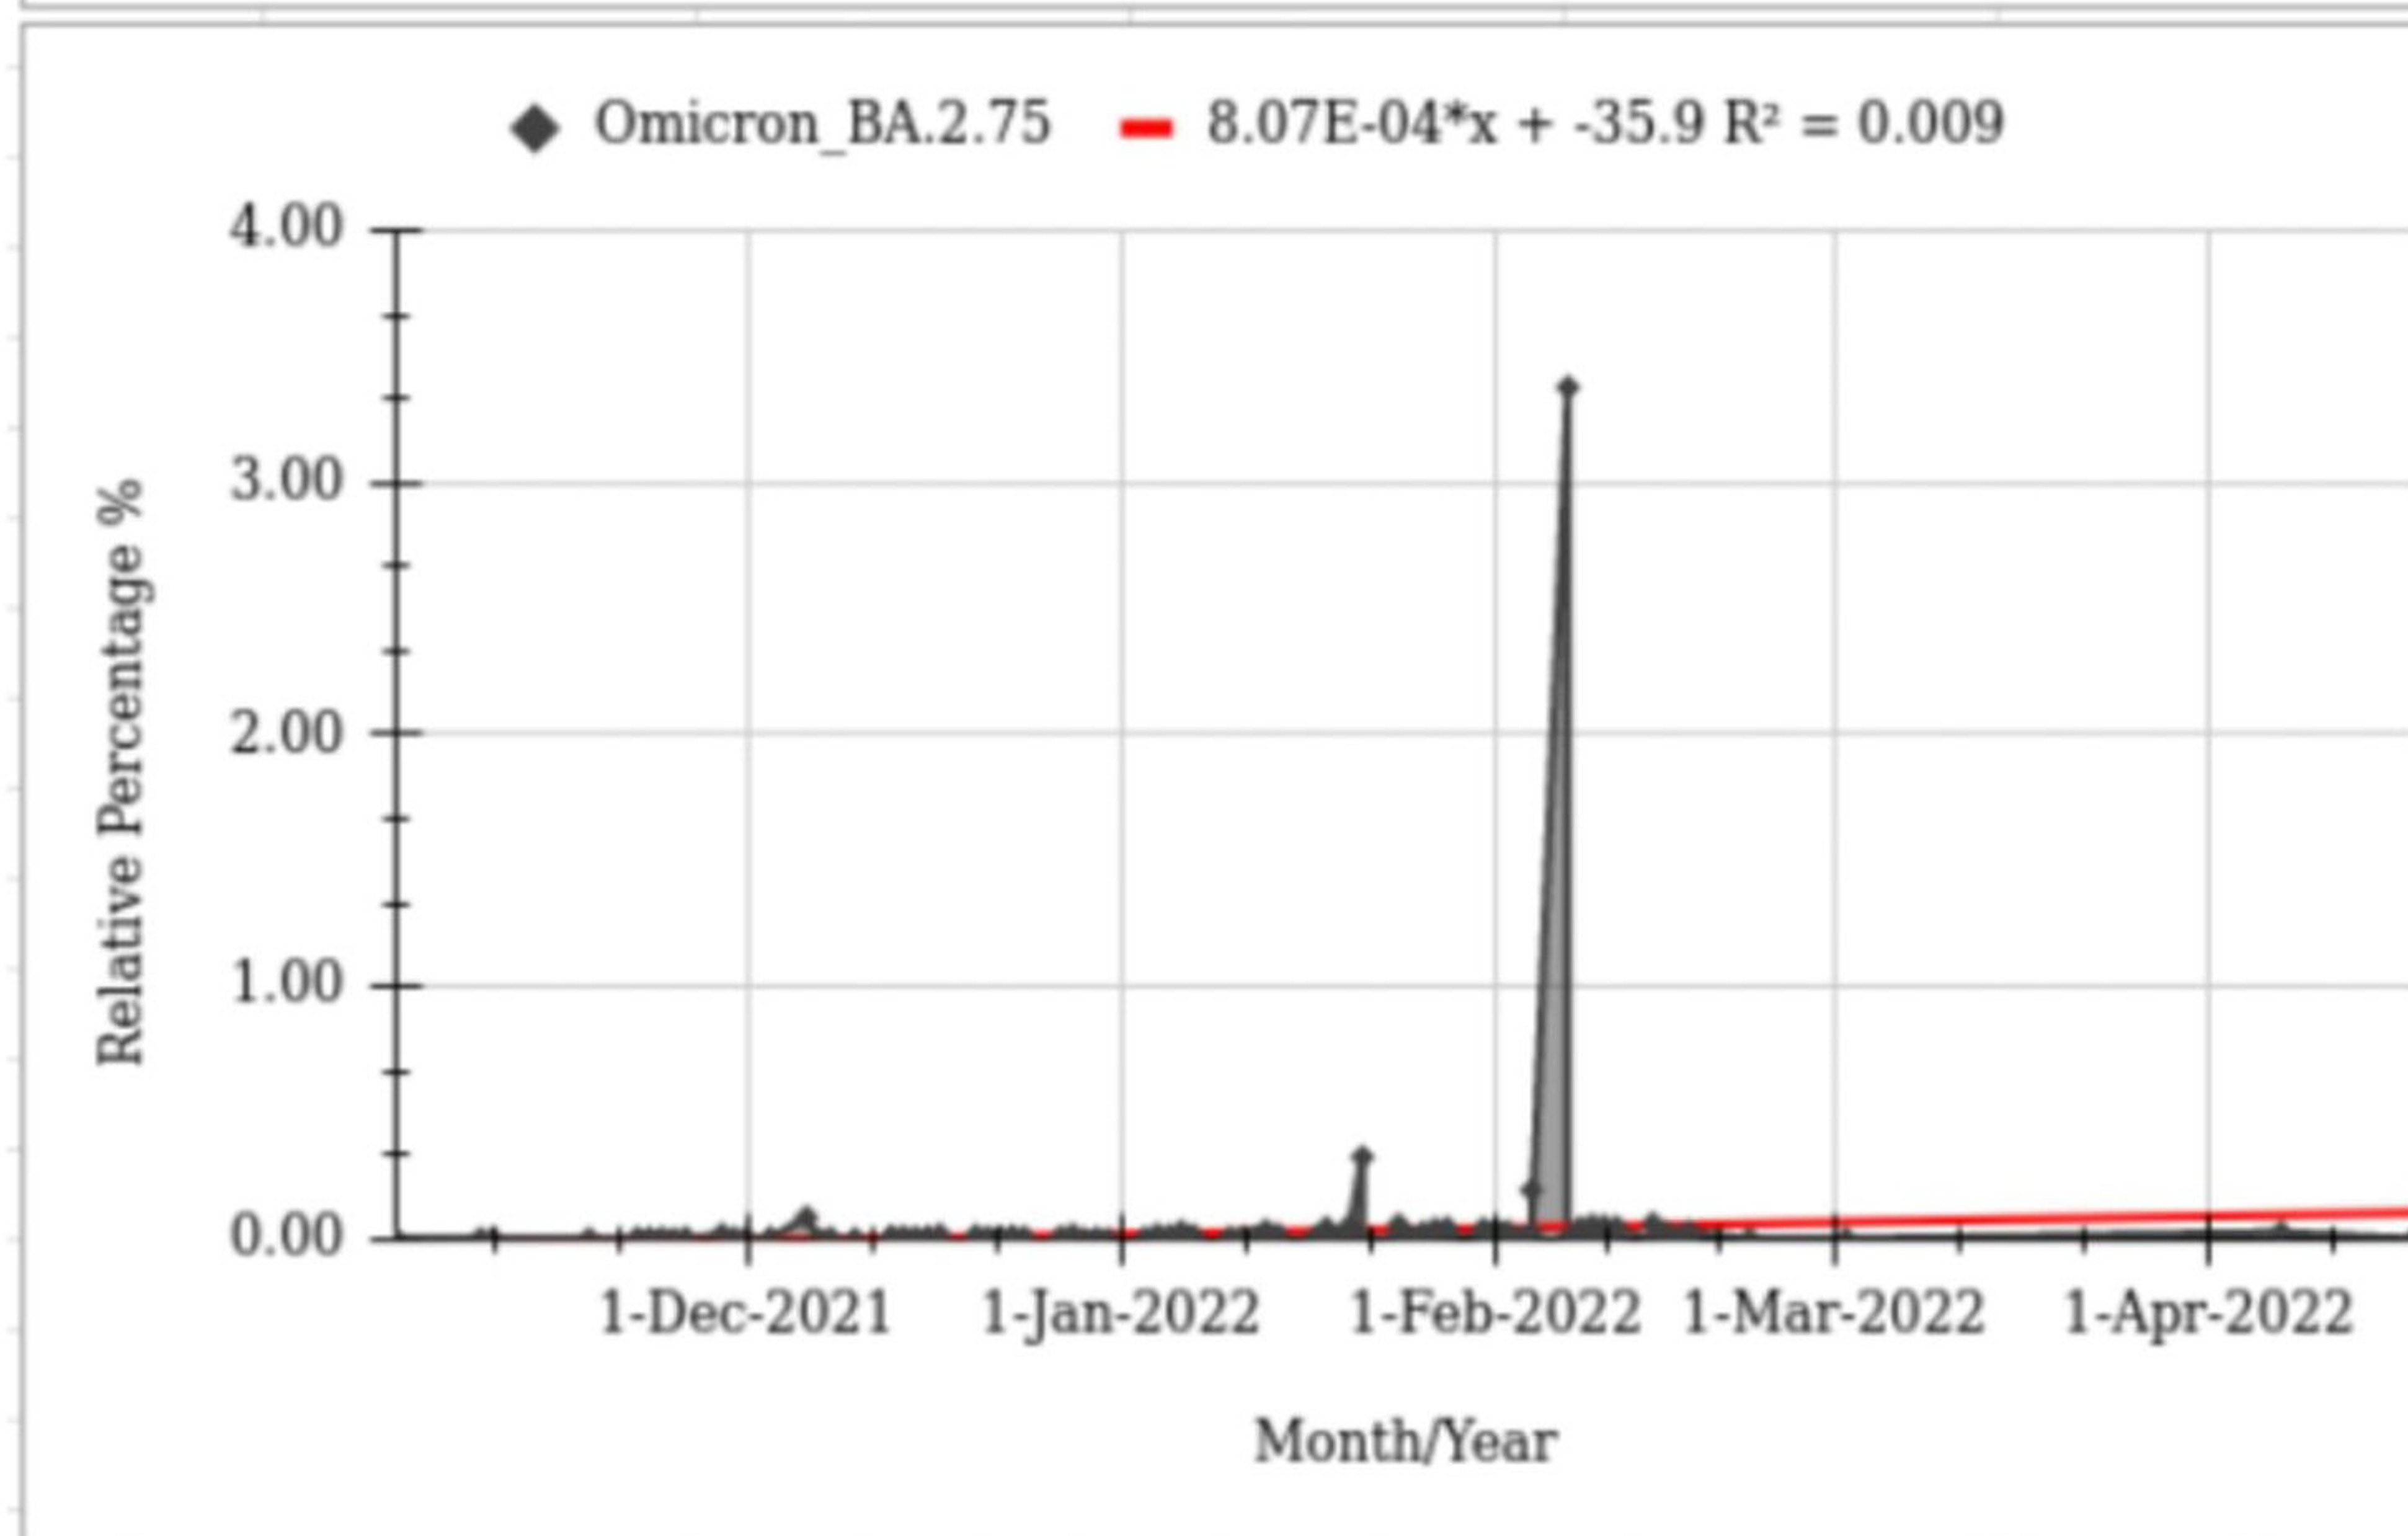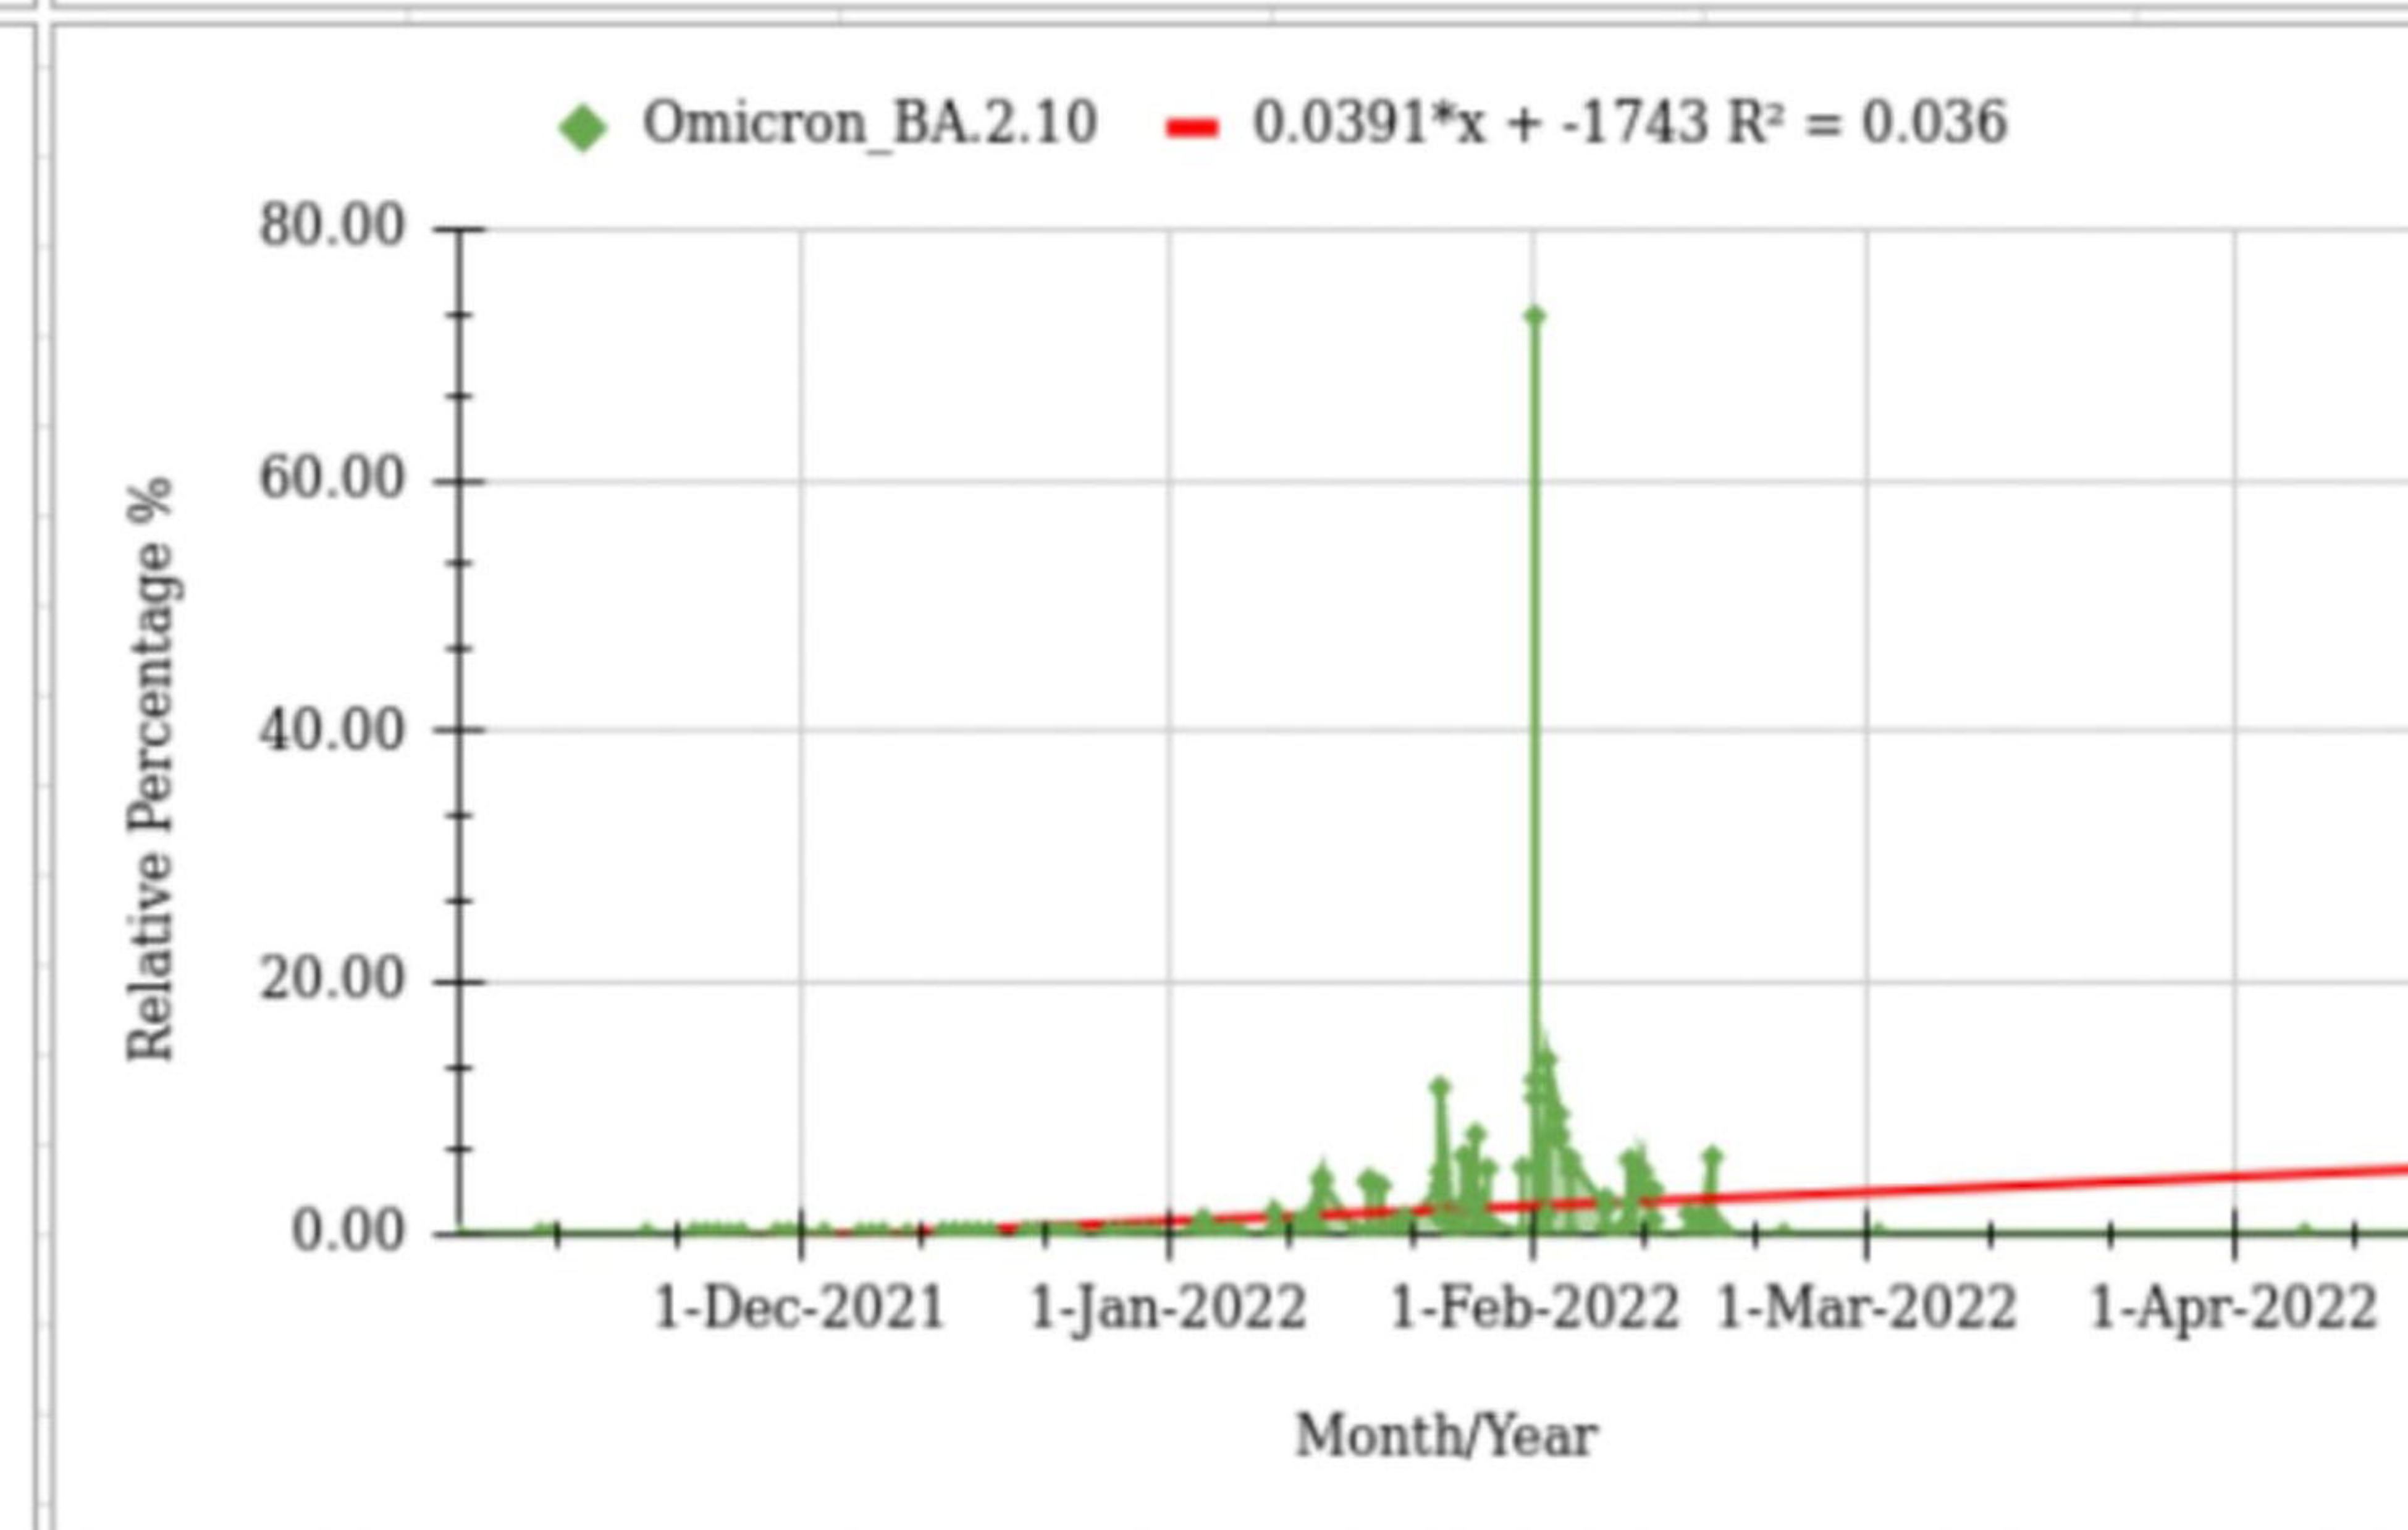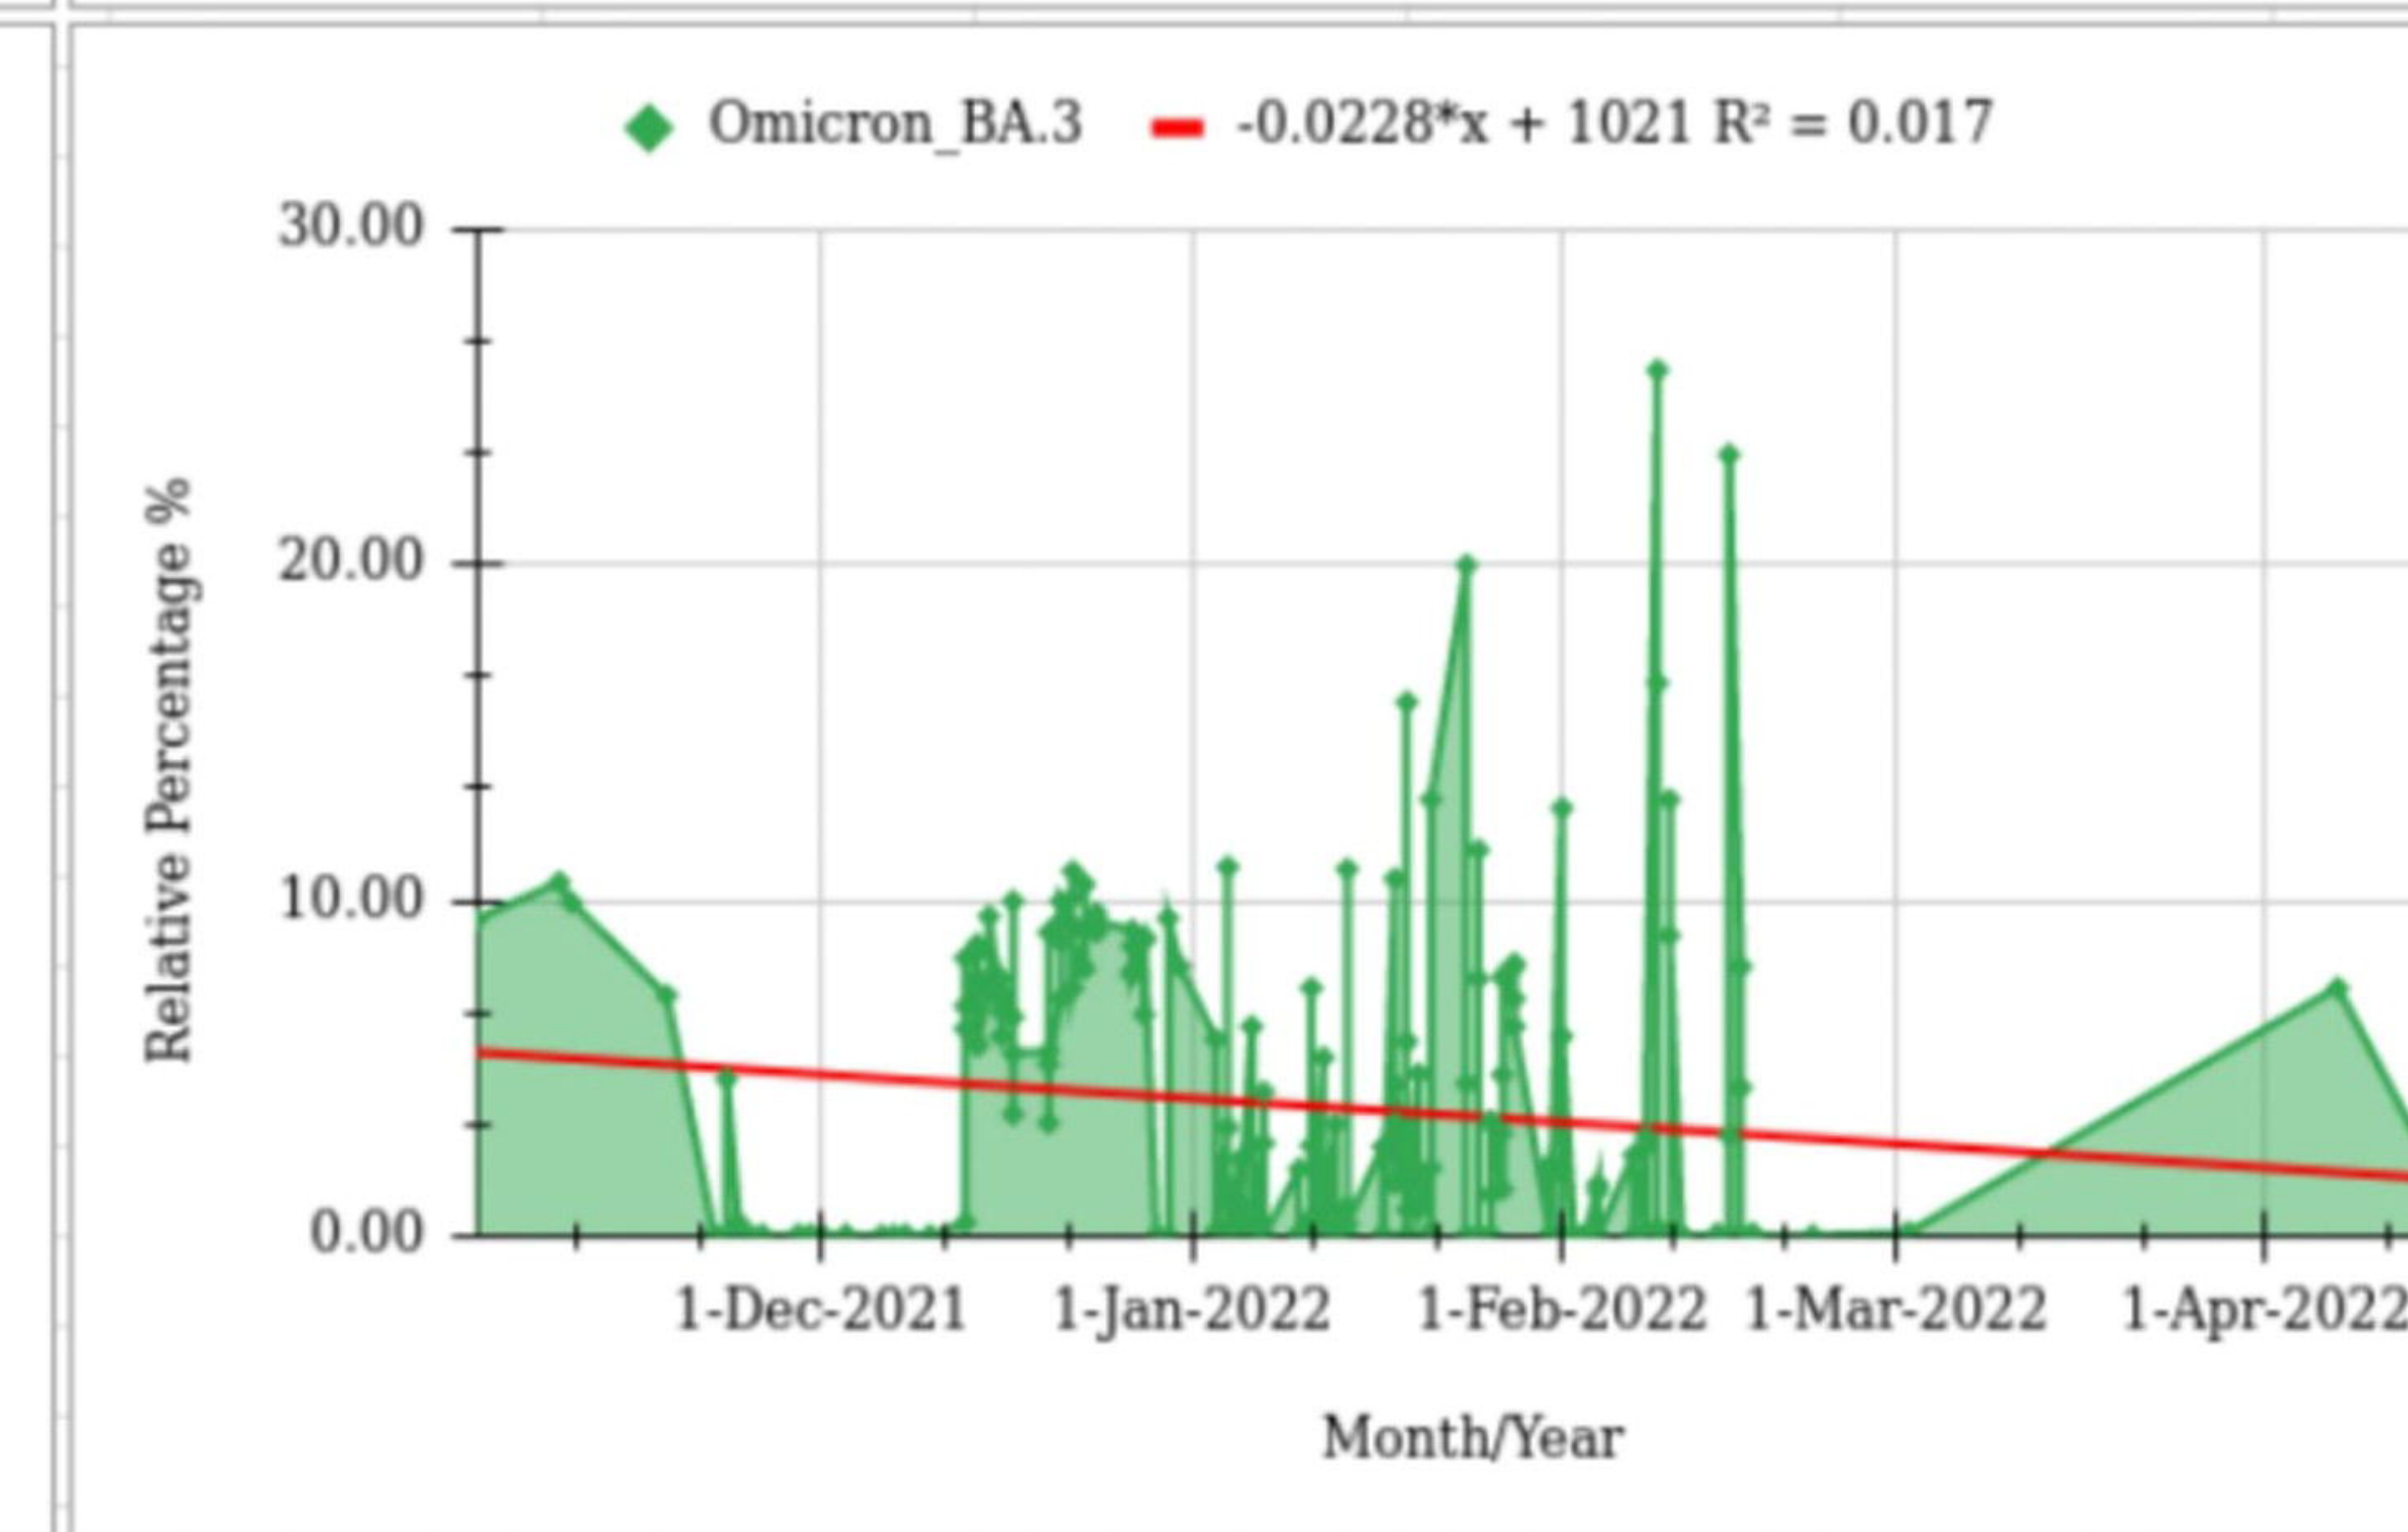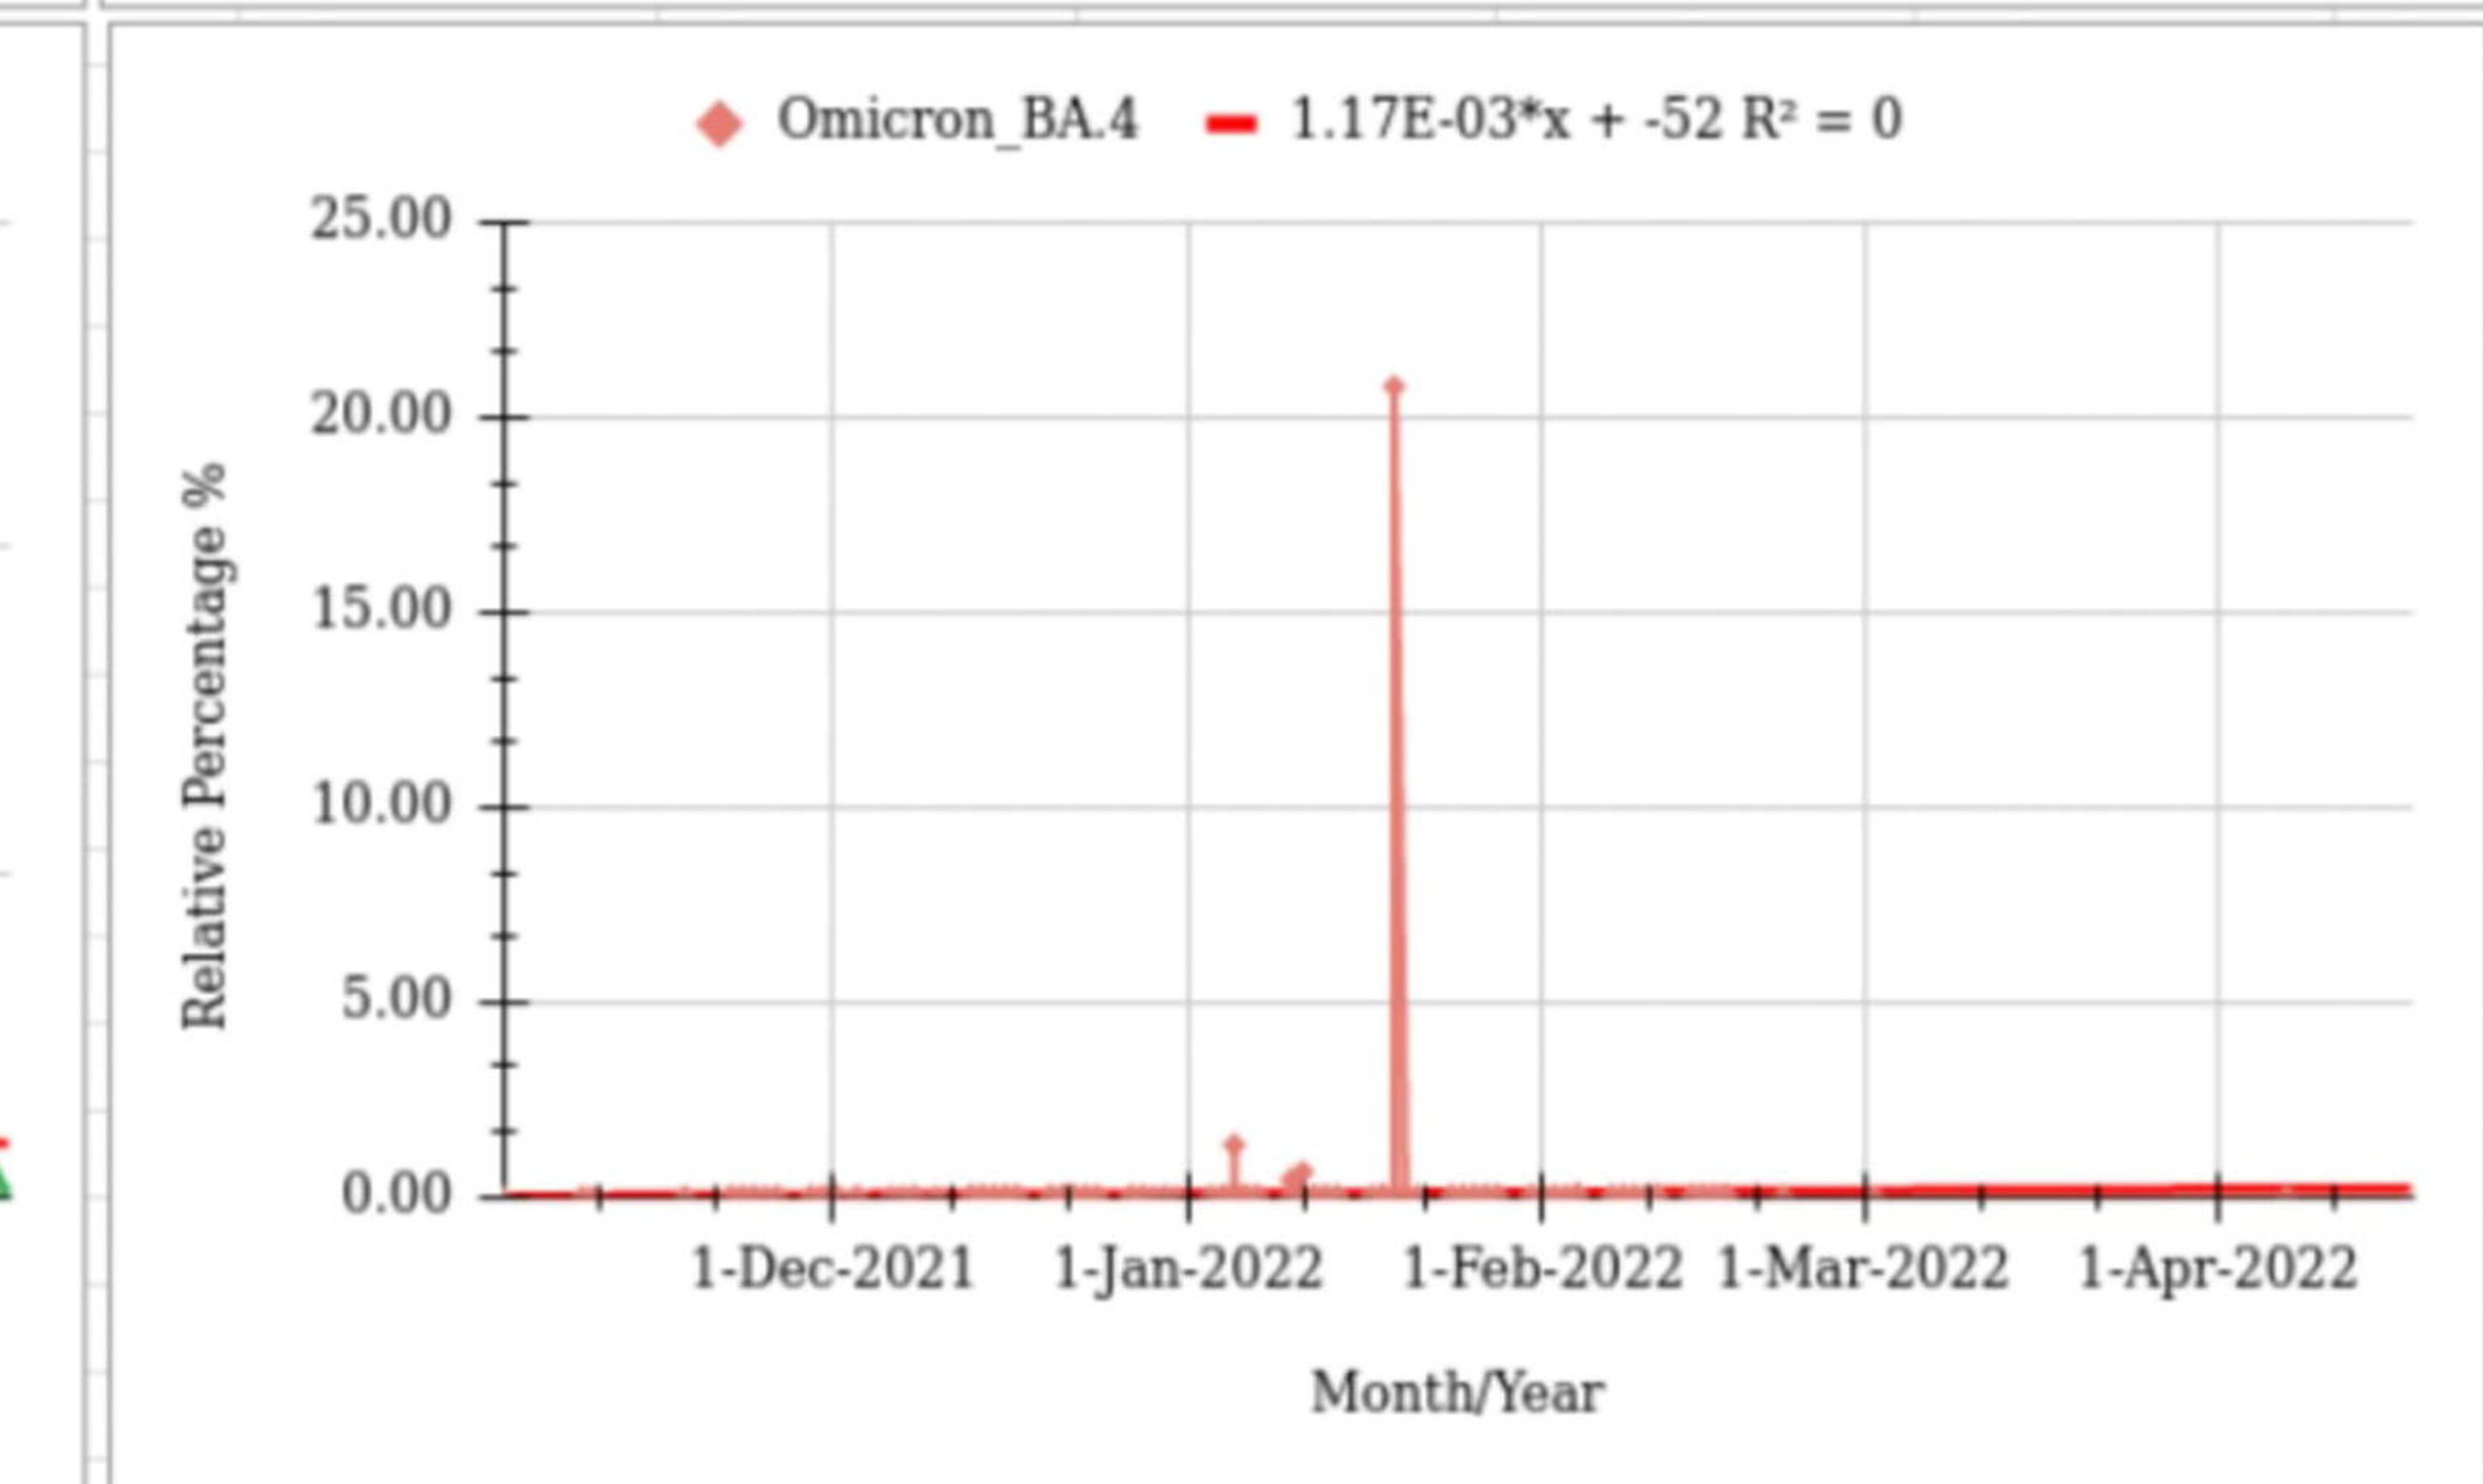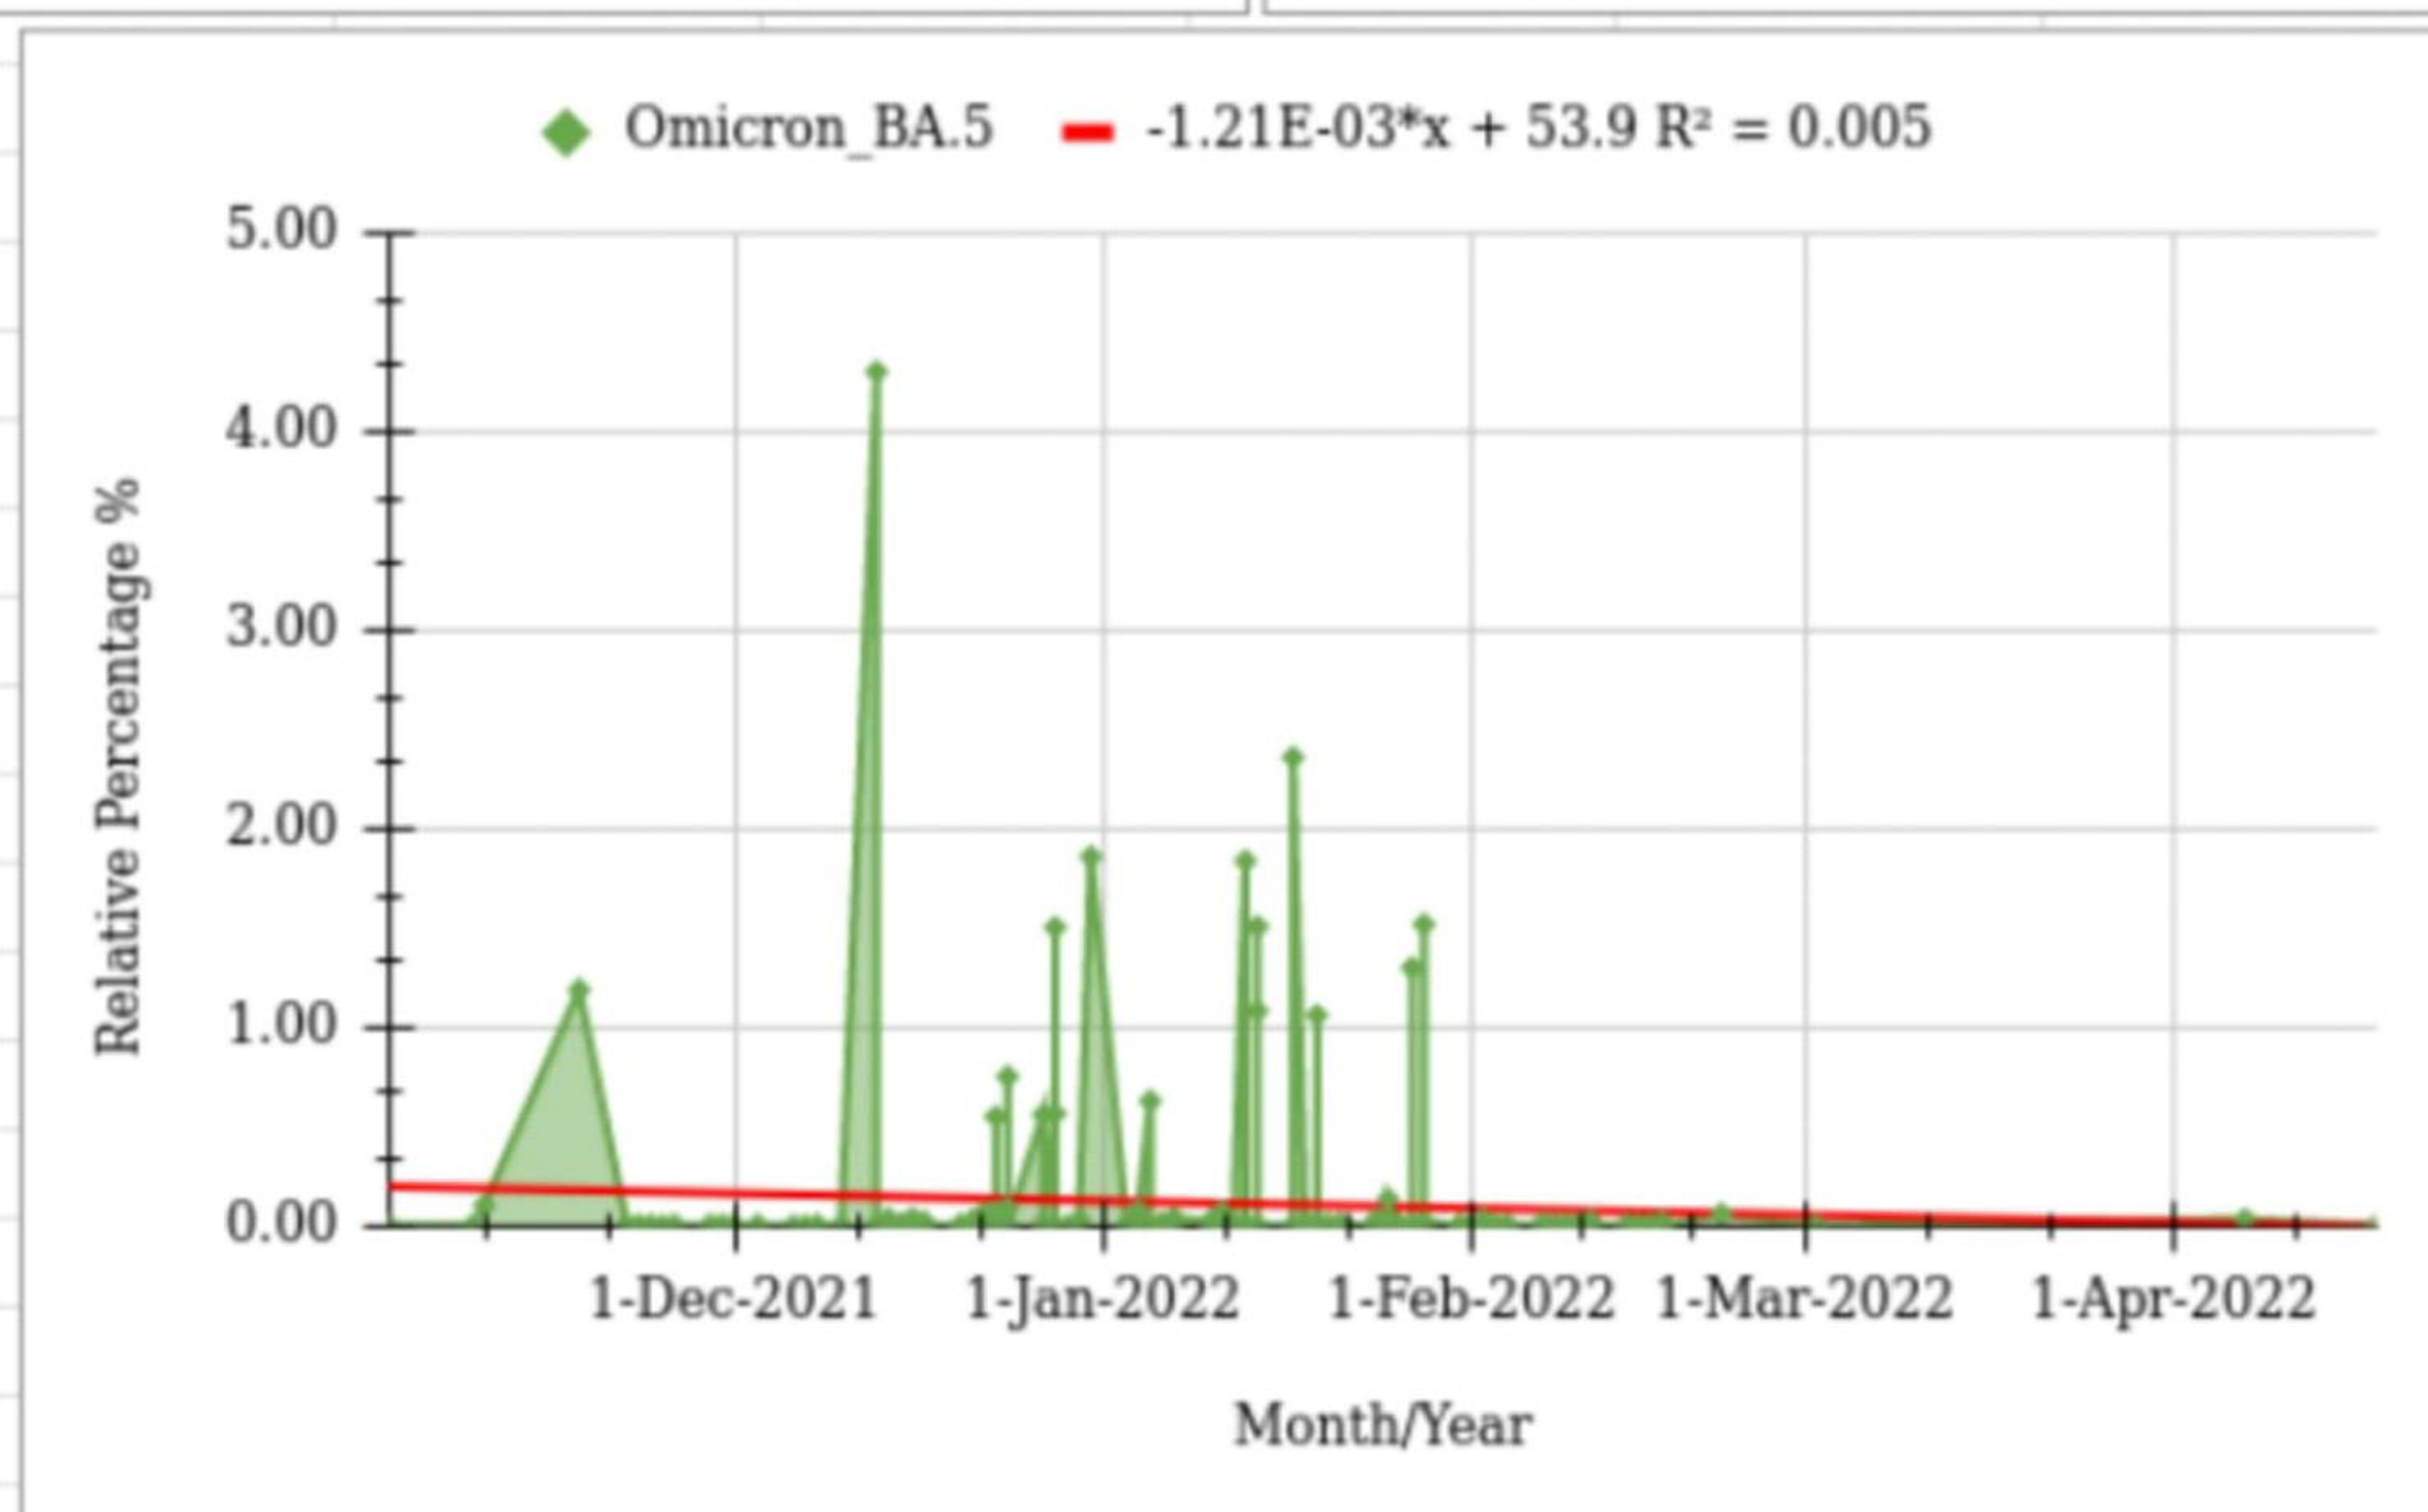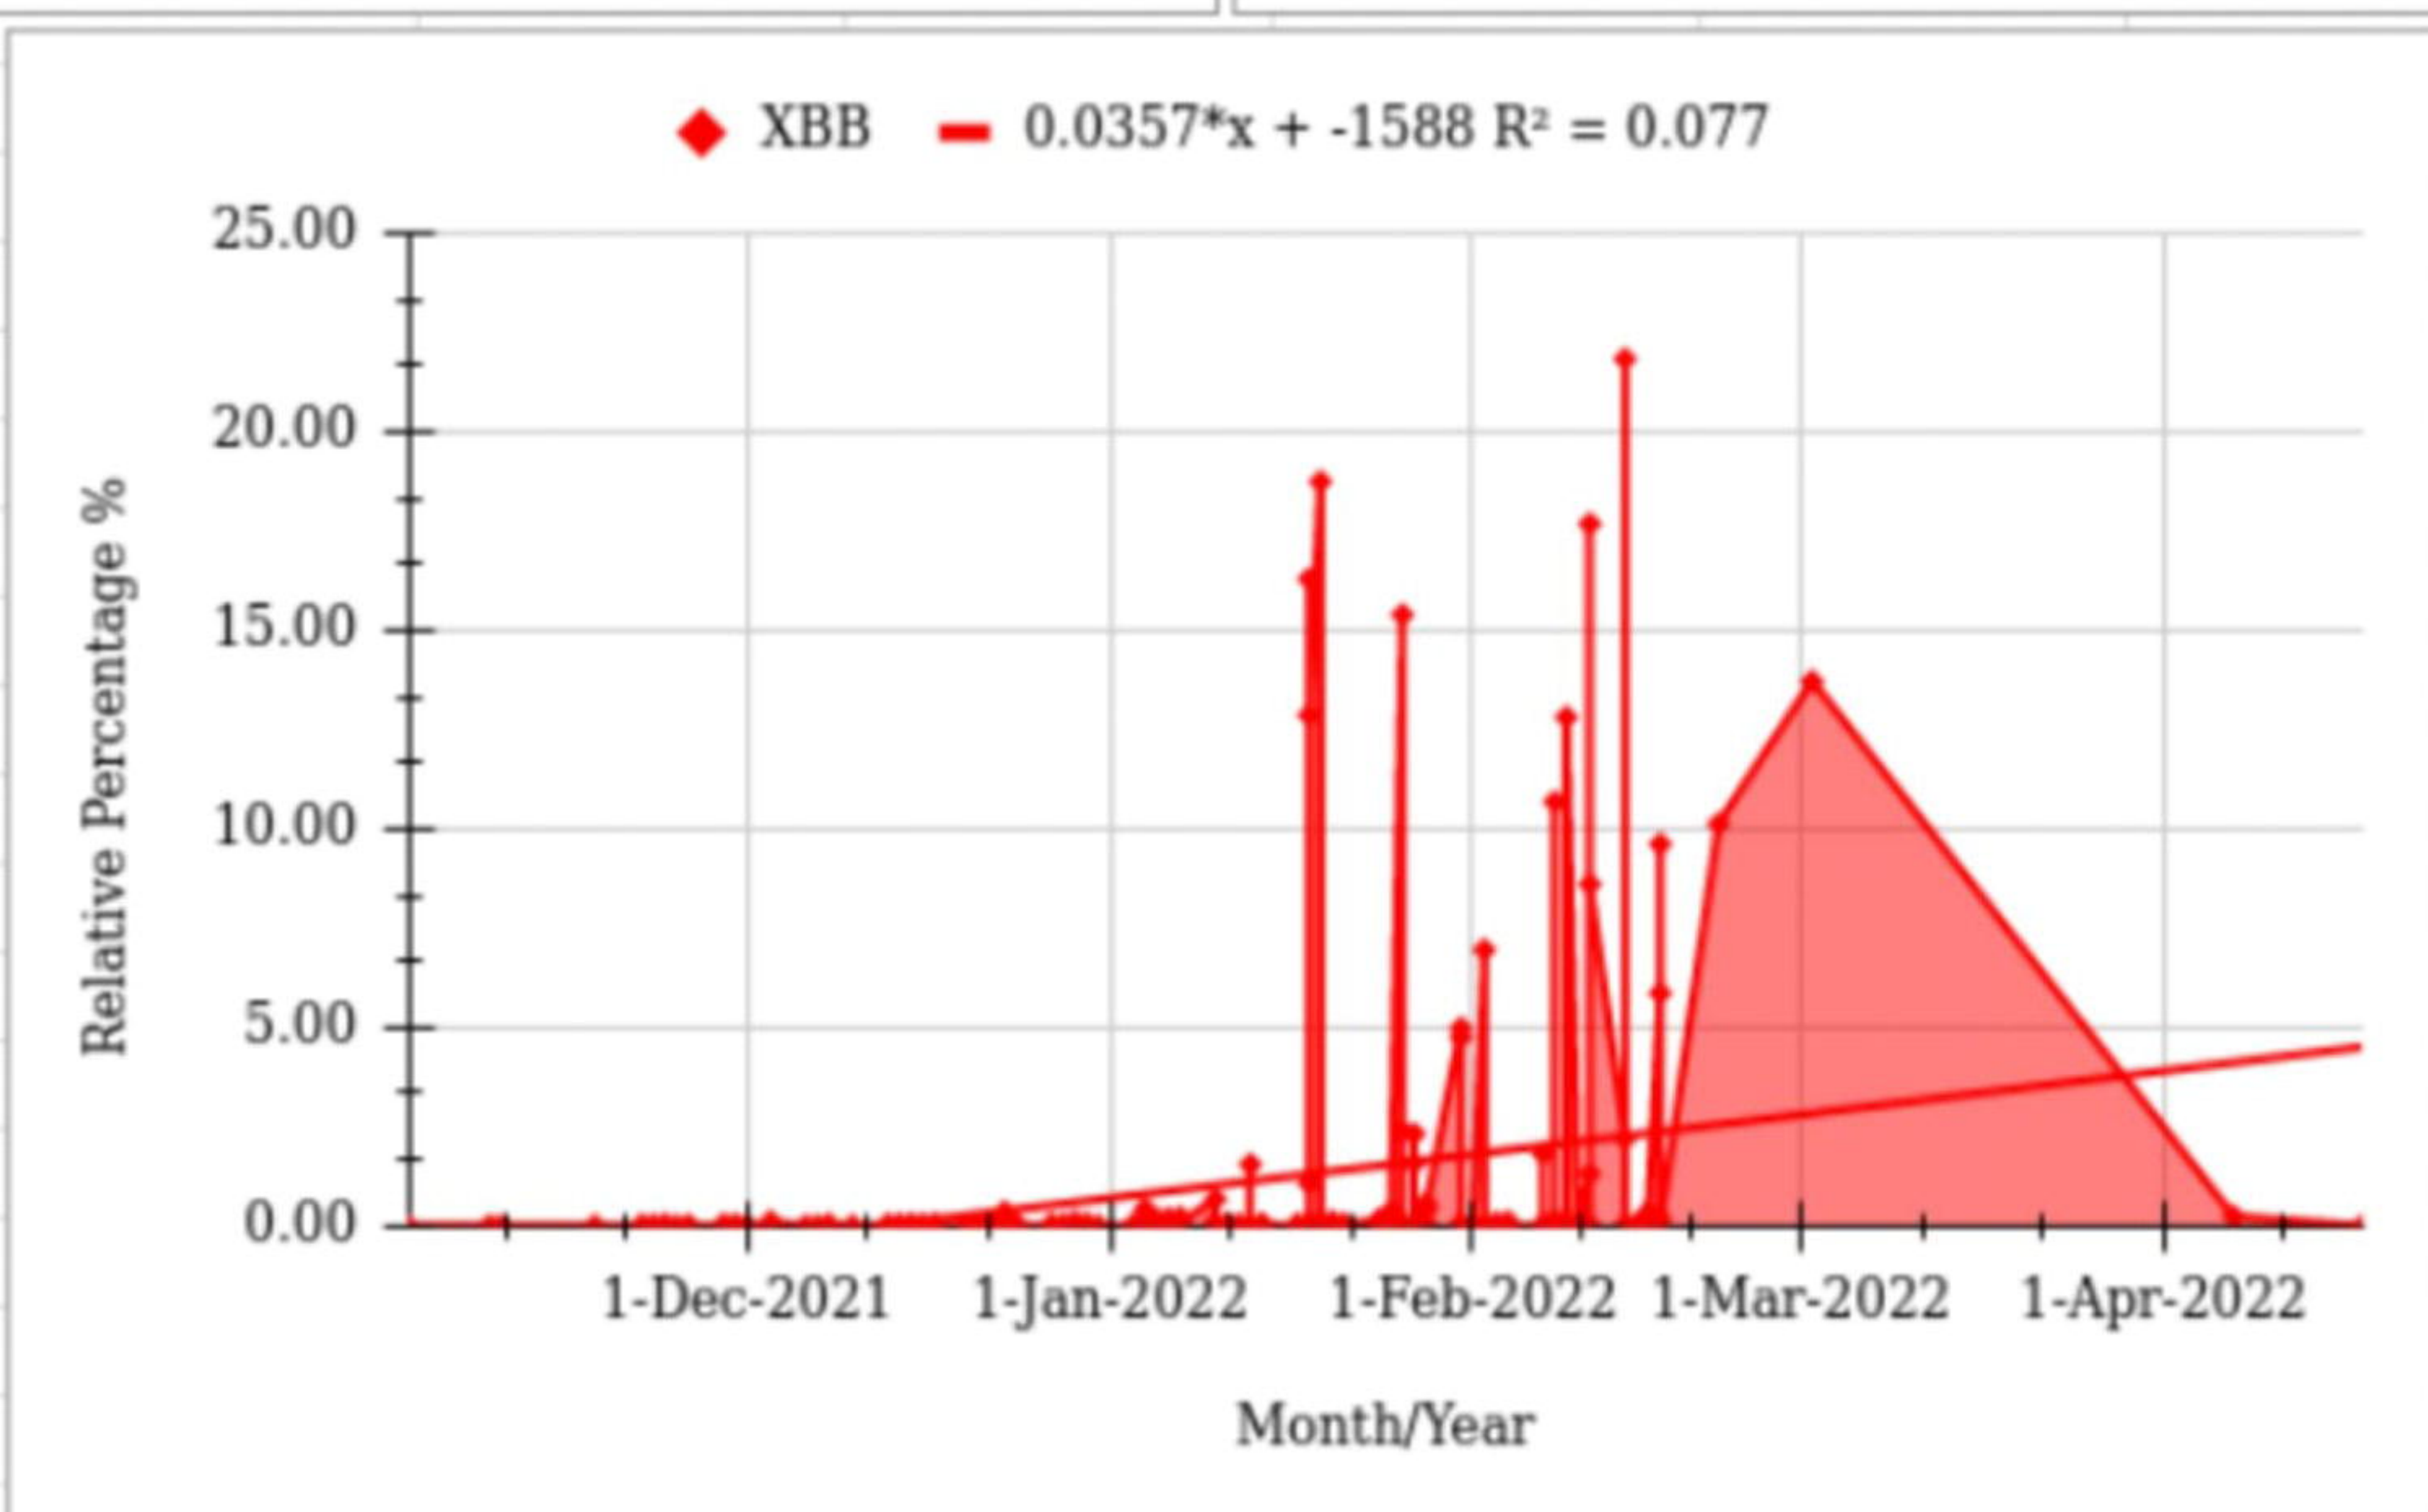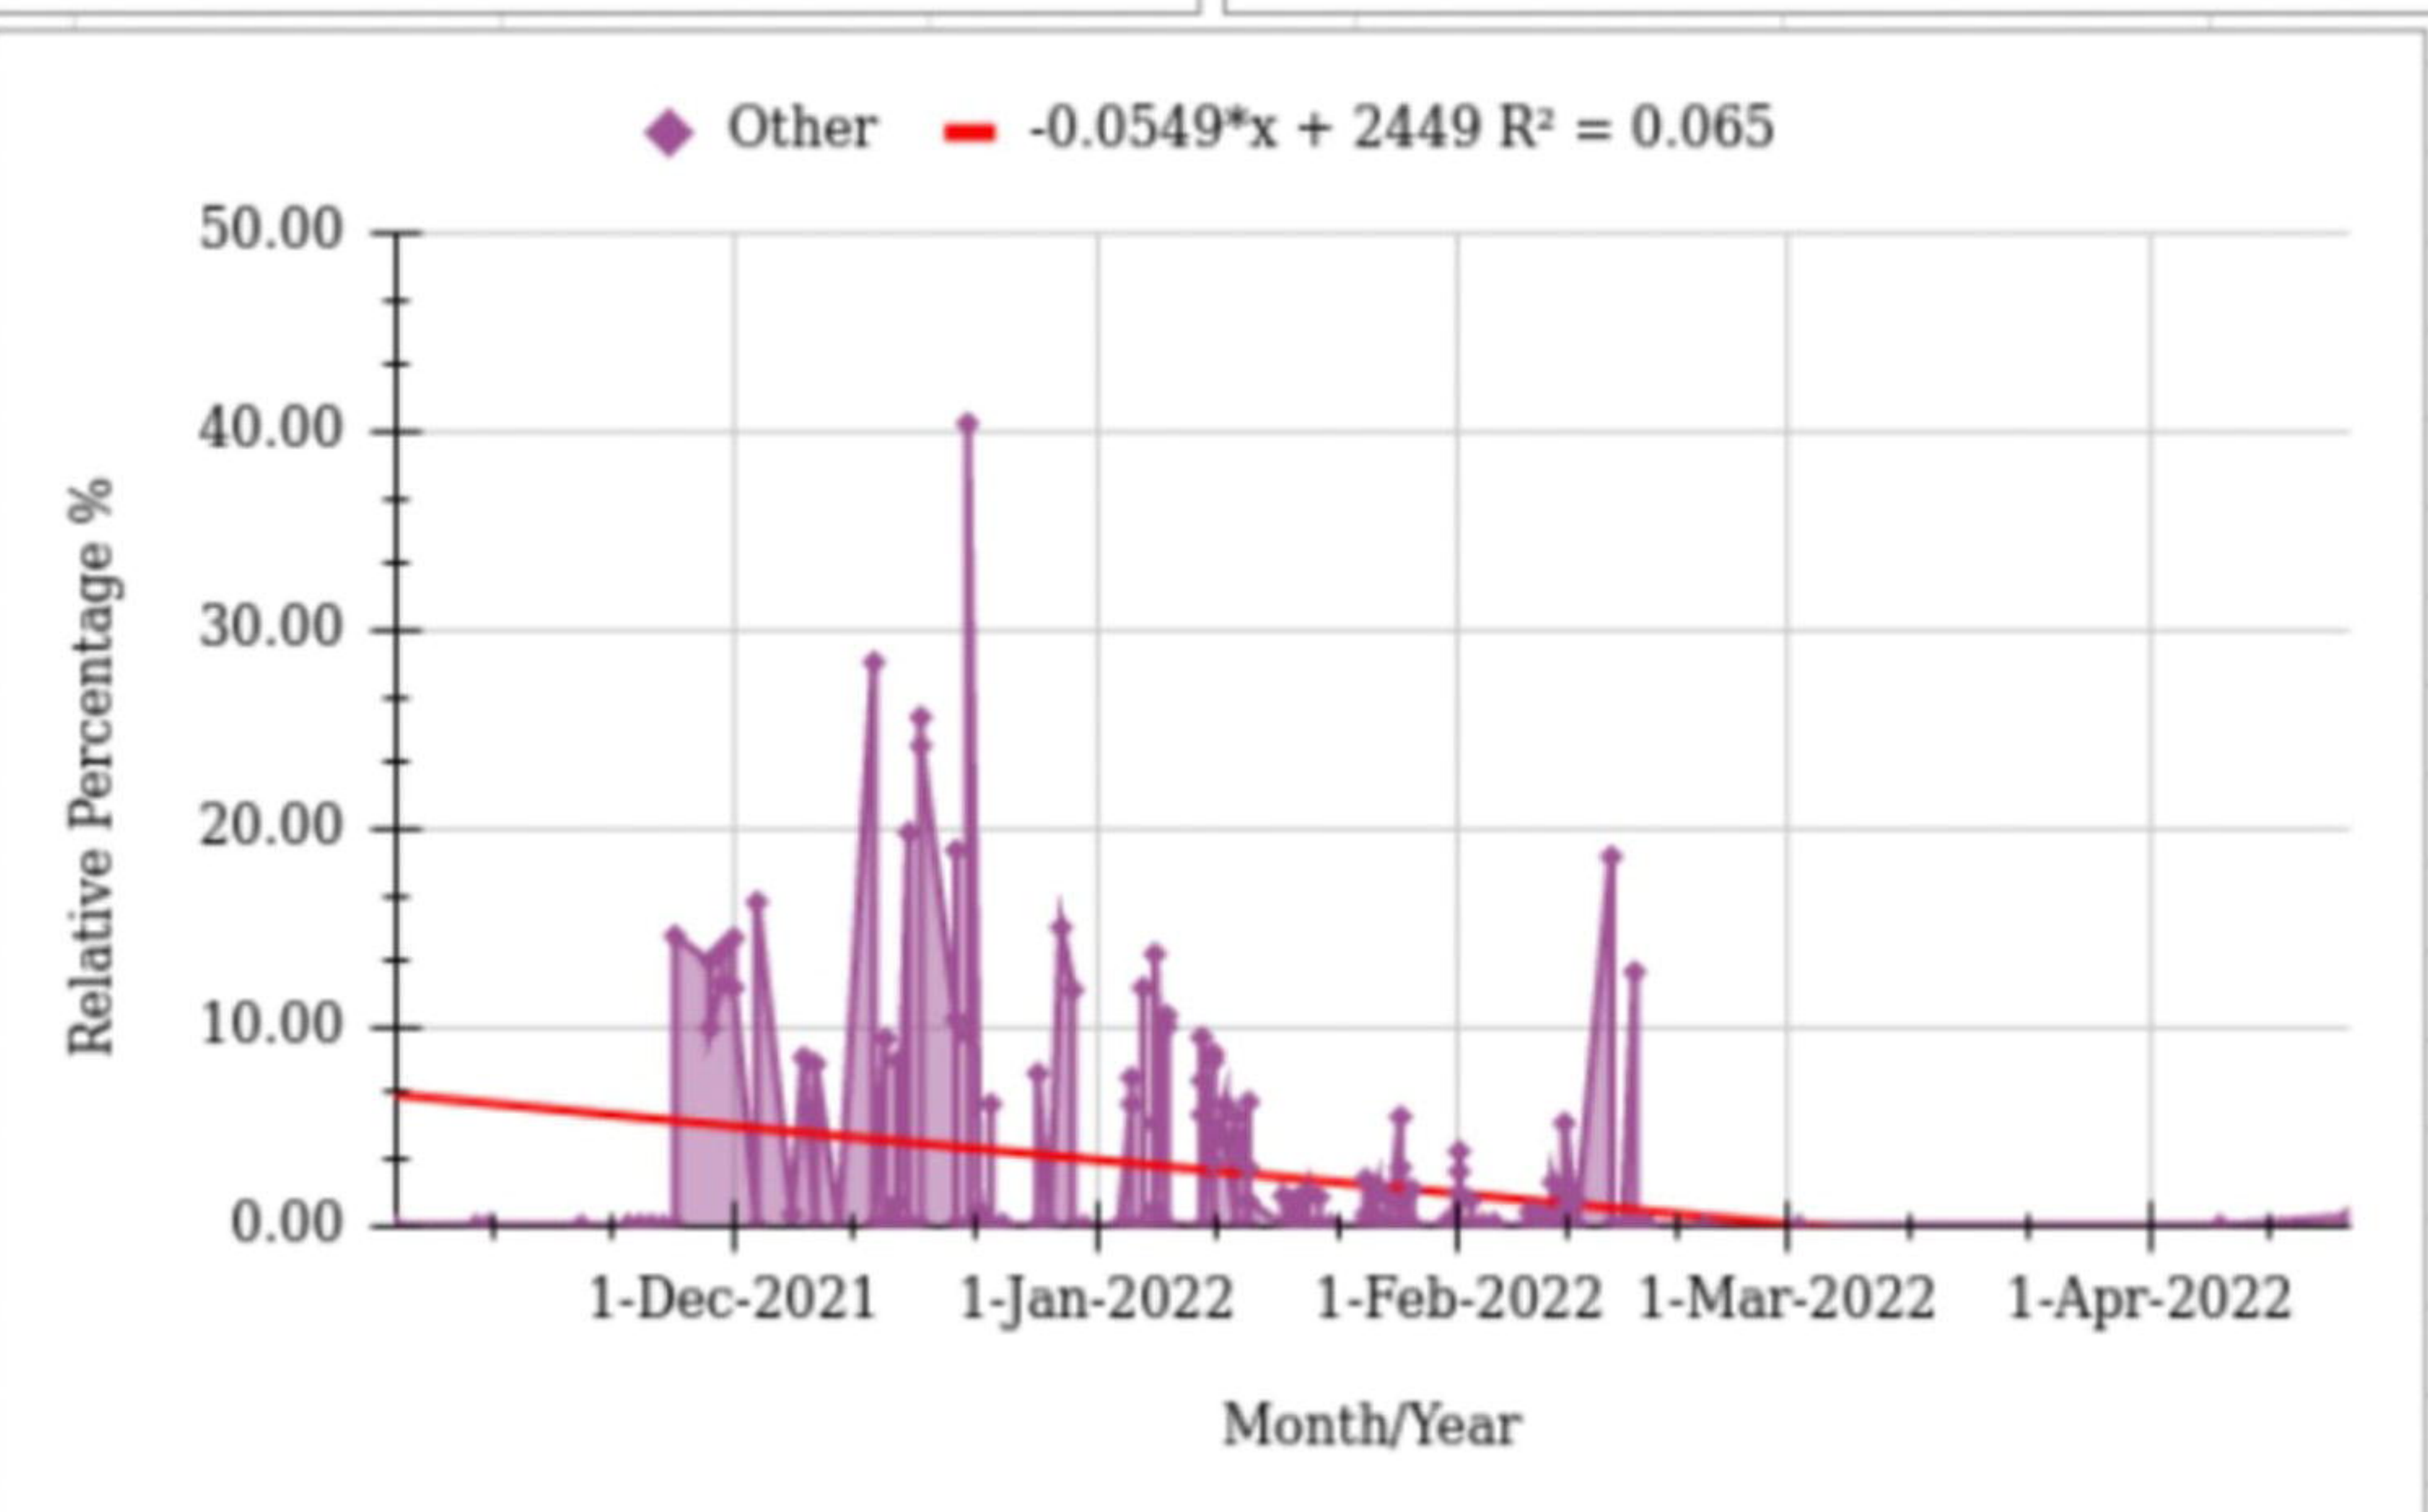

Source: https://medrxiv.org/content/10.1101/2023.02.21.23286222v1.full.pdf
